# Supplementary material
Source: PubMed Central journal article supplement (PMC8137563)

## Supplementary Material

### **The hydroxyquinoline analog YUM70 inhibits GRP78 to induce ER stress-mediated apoptosis in pancreatic cancer**

**Soma Samanta<sup>1</sup>, Suhui Yang<sup>1</sup>, Bikash Debnath<sup>1</sup>, Ding Xue<sup>1</sup>, Yuting Kuang<sup>1,2</sup>, Kavya Ramkumar<sup>1,2</sup>, Amy S. Lee<sup>3</sup>, Mats Ljungman<sup>4</sup>, and Nouri Neamati<sup>1\*</sup>**

<sup>1</sup>Department of Medicinal Chemistry, College of Pharmacy, Rogel Cancer Center, University of Michigan, Ann Arbor, MI, 48109, USA. <sup>2</sup>Department of Pharmacology and Pharmaceutical Sciences, School of Pharmacy, University of Southern California, Los Angeles, CA, USA. <sup>3</sup>Department of Biochemistry and Molecular Medicine, University of Southern California, Keck School of Medicine, USC Norris Comprehensive Cancer Center, Los Angeles 90089, CA, USA, <sup>4</sup>Department of Radiation Oncology, Rogel Cancer Center, Center for RNA Biomedicine, University of Michigan Medical School, and Department of Environmental Health Sciences, School of Public Health, University of Michigan, Ann Arbor, Michigan 48109, USA.

\*Corresponding Author: Nouri Neamati, Ph.D. Department of Medicinal Chemistry, College of Pharmacy, Rogel Cancer Center, University of Michigan, North Campus Research Complex, 1600 Huron Parkway, Bldg 520, Room 1363, Ann Arbor, MI 48109, Phone: 734-647-2732, Email: neamati@umich.edu



## Chemistry

The synthesis of YUM70 and its analogs was generally accomplished by employing the Betti reaction as a modified type of Mannich reaction (Scheme 1) (1). Also, *O*-methylation of two hydroxyquinoline compounds (**4**, **8** and **10**) was carried out by using methyl iodide in the presence of base to yield the analogs **15-17** (Scheme 1). Some of 7-substituted-8-hydroxyquinolines, especially containing aniline in place of amide at C-9, were reported to undergo a retro-Mannich fragmentation (2). Although a poor leaving group, the aniline was somehow displaced to result in the formation of a reactive quinone methide, which in turn is readily attacked by a nucleophile. The similar trends had been found in deamination of phenolic Mannich bases, and the deamination reaction involves elimination of a primary or secondary amine from a Mannich base to afford the vinyl derivative of the original substrates (3,4). In order to test whether our synthetic compounds are likely to undergo a retro-Mannich reaction, we examined the stability of compounds in the presence of different nucleophiles such as aniline, morpholine, piperidine, sodium hydroxide, or sodium acetate under acidic or basic condition (Table I). Interestingly, no reaction occurred either at room temperature for 36 – 63 hours or at 50 °C for 7 – 16 hours, indicating that the retro-Mannich pathway is much less favorable for the amide-containing series of compounds. It is probably because the amide nitrogen at C-9 is less basic than the corresponding aniline nitrogen. In agreement with this finding, the similar 8-hydroxyquinoline compounds have been reported to show good ADME properties, but such analogs containing aniline moiety at C-9 were unstable in the assay (5,6).

**Table I. Stability test of 7-substituted amides of 8-hydroxyquinoline analogs**

| Compound   | Reaction condition |                    |                  |           | Result    |
|------------|--------------------|--------------------|------------------|-----------|-----------|
|            | Acid/Base          | Nucleophile        | Temperature (°C) | Time (hr) |           |
| YUM70 (4)  | NaOH (10 eq.)      | Aniline (5 eq.)    | room temperature | 63        | No change |
|            |                    |                    | 50°C             | 63        | No change |
|            | NaOH (10 eq.)      | Piperidine (3 eq.) | room temperature | 63        | No change |
|            |                    |                    | 50°C             | 63        | No change |
|            | NaOH (5 eq.)       | NaOH (5 eq.)       | room temperature | 63        | No change |
|            |                    |                    | 50°C             | 63        | No change |
|            | HCl (10 eq.)       | EtOH (5 mL)        | room temperature | 63        | No change |
|            |                    |                    | 50°C             | 63        | No change |
|            | HCl (10 eq.)       | NaOAc (5 eq.)      | room temperature | 63        | No change |
|            |                    |                    | 50°C             | 63        | No change |
| YUM94 (13) | NaOH (10 eq.)      | Aniline (3 eq.)    | room temperature | 36        | No change |
|            |                    |                    | 50°C             | 7         | No change |
|            | NaOH (10 eq.)      | Morpholine (3 eq.) | room temperature | 36        | No change |
|            |                    |                    | 50°C             | 7         | No change |
|            | NaOH (5 eq.)       | NaOH (5 eq.)       | room temperature | 36        | No change |
|            |                    |                    | 50°C             | 7         | No change |

## General chemical methods:

All commercial chemicals and solvents were reagent grade and were used without further purification unless otherwise specified. Analytical thin layer chromatography was performed on Merck precoated plates (silica gel 60 F<sub>254</sub>) to follow the course of the reactions. <sup>1</sup>H and <sup>13</sup>C NMR spectra were recorded on a Bruker Ultrashield 300 MHz, a Bruker Ascend 400 MHz, or 500 MHz Varian NMR spectrometer. Chemical shifts ( $\delta$ ) of NMR are reported in parts per million (ppm) units relative to the residual undeuterated solvent. The following abbreviations were used to describe peak splitting patterns when appropriate: s (singlet), d (doublet), t (triplet), q (quartet), m (multiplet), bs (broad singlet), dd (doublet of doublets), td (triplet of doublets). Coupling constants ( $J$ ) are expressed in hertz unit (Hz). Mass spectra were obtained on a Shimadzu LCMS-2020 liquid chromatography mass spectrometer or on a Thermo-Scientific LCQ Fleet mass spectrometer. The purity of compounds was determined by UPLC or HPLC analysis. The Waters Acquity H class analytical UPLC was used for UV detection at 230 and 254 nm wavelengths. The reverse phase column was used in the Acquity UPLC BEH (C18-1.7  $\mu$ m, 2.1 mm  $\times$  50 mm). The analytical HPLC Shimadzu HPLC Test Kit C18 column (3  $\mu$ m, 4.6  $\times$  50 mm) was used under the following gradient elution condition: mobile phase A of acetonitrile/water (10-95%) or mobile phase B of methanol/water (10-95%). The purity was established by integration of the areas of major peaks detected at 254 nm. All tested compounds had  $\geq$ 95% purity unless mentioned. For some compounds, flash chromatography was performed using a Biotage Isolera One flash purification system.

## Detailed synthetic procedures and characterization

***N*-(benzo[d][1,3]dioxol-5-yl(5-chloro-8-hydroxyquinolin-7-yl)methyl)butyramide (YUM70, 4).** A mixture of 5-chloro-8-hydroxyquinoline (486 mg, 2.57 mmol), piperonal (1.06 g, 7.02 mmol), and butyramide (200 mg, 2.34 mmol) were stirred neat at 130-150 °C for 6-12 hrs. Upon heating, the reaction mixture melted and solid was formed after completion of the reaction. The solid was isolated by multiple trituration with ethyl acetate and diethyl ether, and the crude product was purified by recrystallization from ethanol to yield **YUM70** as a tan solid (302 mg, 32%). **<sup>1</sup>H NMR** (500 MHz, DMSO-*d*<sub>6</sub>) δ: 10.30 (bs, 1H), 8.94 (dd, *J* = 4.1, 1.5 Hz, 1H), 8.66 (d, *J* = 8.8 Hz, 1H), 8.46 (dd, *J* = 8.5, 1.5 Hz, 1H), 7.72-7.69 (m, 1H), 7.70 (s, 1H), 6.84-6.80 (m, 2H), 6.70 (d, *J* = 8.1 Hz, 1H), 6.60 (d, *J* = 8.7 Hz, 1H), 5.95 (s, 2H), 2.18 (t, *J* = 7.2 Hz, 2H), 1.51 (sextet, *J* = 7.2 Hz, 2H), 0.84 (t, *J* = 7.3 Hz, 3H). **<sup>13</sup>C NMR** (101 MHz, DMSO-*d*<sub>6</sub>) δ: 171.85, 149.64, 149.52, 147.78, 146.58, 139.14, 136.40, 132.96, 126.53, 126.18, 125.26, 123.38, 120.57, 119.05, 108.51, 107.84, 101.43, 49.72, 37.71, 19.25, 14.08. **MS** (ESI) *m/z* = 399 (M+H)<sup>+</sup>. **UPLC** (mobile phase A): purity 97.4%.

***N*-((5-chloro-8-hydroxyquinolin-7-yl)(phenyl)methyl)butyramide (YUM72, 5).** The same procedure for the synthesis of **YUM70** was followed using 5-chloro-8-hydroxyquinoline (103 mg, 0.55 mmol), benzaldehyde (162 mg, 1.5 mmol), and butyramide (44 mg, 0.50 mmol) as reactants to yield **YUM72** as a shiny brown solid (106 mg, 60%). **<sup>1</sup>H NMR** (500 MHz, DMSO-*d*<sub>6</sub>) δ: 10.32 (bs, 1H), 8.95 (dd, *J* = 4.2, 1.5 Hz, 1H), 8.74 (d, *J* = 8.8 Hz, 1H), 8.47 (dd, *J* = 8.5, 1.5 Hz, 1H), 7.72-7.69 (m, 1H), 7.69 (s, 1H), 7.32-7.29 (m, 2H), 7.25-7.20 (m, 3H), 6.70 (d, *J* = 8.7 Hz, 1H), 2.19 (t, *J* = 7.2 Hz, 2H), 1.53 (sextet, *J* = 7.4 Hz, 2H), 0.85 (t, *J* = 7.4 Hz, 3H). **<sup>13</sup>C NMR** (101 MHz, DMSO-*d*<sub>6</sub>) δ: 171.93, 149.69, 149.66, 142.43, 139.14, 132.98, 128.85, 127.42, 127.38,

126.75, 125.98, 125.29, 123.41, 119.03, 49.93, 37.71, 19.26, 14.09. **MS** (ESI)  $m/z = 355$  (M+H)<sup>+</sup>.

**UPLC** (mobile phase A): purity 98.8%.

***N*-(1-(5-chloro-8-hydroxyquinolin-7-yl)butyl)butyramide (YUM75, 6)**. The same procedure for the synthesis of **YUM70** was followed using 5-chloro-8-hydroxyquinoline (100 mg, 0.53 mmol), butyraldehyde (177 mg, 2.4 mmol), and butyramide (43 mg, 0.48 mmol) as reactants. The product obtained from recrystallization was further purified by column chromatography (*n*-hexane:EtOAc=5:1, EtOAc) to yield **YUM75** as a beige solid (25 mg, 16%). **<sup>1</sup>H NMR** (500 MHz, DMSO-*d*6)  $\delta$ : 10.09 (bs, 1H), 8.93 (dd,  $J = 4.2, 1.5$  Hz, 1H), 8.44 (dd,  $J = 8.7, 1.5$  Hz, 1H), 8.24 (d,  $J = 8.5$  Hz, 1H), 7.68 (dd,  $J = 8.5, 4.1$  Hz, 1H), 7.63 (s, 1H), 5.40-5.36 (m, 1H), 2.11 (td,  $J = 7.2, 3.2$  Hz, 2H), 1.63 (q,  $J = 7.6$  Hz, 2H), 1.50 (sextet,  $J = 7.4$  Hz, 2H), 1.39-1.33 (m, 1H), 1.28-1.23 (m, 1H), 0.87 (t,  $J = 7.4$  Hz, 3H), 0.83 (t,  $J = 7.4$  Hz, 3H). **<sup>13</sup>C NMR** (101 MHz, DMSO-*d*6)  $\delta$ : 172.02, 149.46, 149.12, 139.02, 132.88, 127.90, 126.01, 124.91, 123.06, 118.88, 46.63, 37.85, 37.69, 19.68, 19.29, 14.07, 14.00. **MS** (ESI)  $m/z = 343$  (M+Na)<sup>+</sup>. **UPLC** (mobile phase A): purity 97.9%.

**2-Chloro-*N*-((5-chloro-8-hydroxyquinolin-7-yl)(phenyl)methyl)acetamide (YUM79, 7)**. The same procedure for the synthesis of **YUM70** was followed using 5-chloro-8-hydroxyquinoline (100 mg, 0.53 mmol), benzaldehyde (156 mg, 1.4 mmol), and 2-chloroacetamide (46 mg, 0.48 mmol) as reactants to yield **YUM79** as a brown solid (59 mg, 34%). **<sup>1</sup>H NMR** (500 MHz, DMSO-*d*6)  $\delta$ : 10.43 (bs, 1H), 9.17 (d,  $J = 8.5$  Hz, 1H), 8.95 (dd,  $J = 4.4, 1.5$  Hz, 1H), 8.49-8.46 (m, 1H), 7.72 (dd,  $J = 8.5, 4.2$  Hz, 1H), 7.67 (s, 1H), 7.34-7.31 (m, 2H), 7.27-7.22 (m, 3H), 6.65 (d,  $J = 8.4$  Hz, 1H), 4.19 (d,  $J = 2.6$  Hz, 2H). **<sup>13</sup>C NMR** (101 MHz, DMSO-*d*6)  $\delta$ : 165.89, 149.89, 149.76, 141.58, 139.16, 133.02, 128.97, 127.65, 127.40, 126.63, 125.45, 125.05, 123.56, 119.16, 50.79, 43.19. **MS** (ESI)  $m/z = 383$  (M+Na)<sup>+</sup>. **UPLC** (mobile phase A): purity 94.3%.

**2-Chloro-*N*-((5-chloro-8-hydroxyquinolin-7-yl)(3-methoxyphenyl)methyl)acetamide**

(**YUM82, 8**). The same procedure for the synthesis of **YUM70** was followed using 5-chloro-8-hydroxyquinoline (196 mg, 1.04 mmol), 3-methoxybenzaldehyde (392 mg, 2.82 mmol), and 2-chloroacetamide (90 mg, 0.94 mmol) as reactants to yield **YUM82** as an ivory solid (52 mg, 14%). <sup>1</sup>H NMR (400 MHz, DMSO-*d*<sub>6</sub>) δ: 10.43 (bs, 1H), 9.16 (d, *J* = 8.4 Hz, 1H), 8.97 (dd, *J* = 4.4, 1.6 Hz, 1H), 8.49 (dd, *J* = 8.4, 1.6 Hz, 1H), 7.74 (dd, *J* = 8.4, 4.4 Hz, 1H), 7.66 (s, 1H), 7.25 (t, *J* = 8.0 Hz, 1H), 6.85-6.82 (m, 3H), 6.64 (d, *J* = 8.8 Hz, 1H), 4.20 (d, *J* = 3.6 Hz, 2H), 3.72 (s, 3H). <sup>13</sup>C NMR (101 MHz, DMSO-*d*<sub>6</sub>) δ: 165.88, 159.82, 149.89, 149.76, 143.24, 139.18, 133.02, 130.10, 126.62, 125.45, 125.00, 123.57, 119.59, 119.13, 113.43, 112.58, 55.52, 50.64, 43.20. MS (ESI) *m/z* = 391 (M+H)<sup>+</sup>. UPLC (mobile phase A): purity 99.0%.

**2-Chloro-*N*-((5-chloro-8-hydroxyquinolin-7-yl)(4-methoxyphenyl)methyl)acetamide**

(**YUM86, 9**). The same procedure for the synthesis of **YUM70** was followed using 5-chloro-8-hydroxyquinoline (196 mg, 1.04 mmol), 3-methoxybenzaldehyde (393 mg, 2.82 mmol), and 2-chloroacetamide (90 mg, 0.94 mmol) as reactants to yield **YUM86** as an ivory solid (98 mg, 27%). <sup>1</sup>H NMR (400 MHz, DMSO-*d*<sub>6</sub>) δ: 10.38 (bs, 1H), 9.12 (d, *J* = 8.4 Hz, 1H), 8.97 (dd, *J* = 4.0, 1.2 Hz, 1H), 8.50 (dd, *J* = 8.4, 1.6 Hz, 1H), 7.73 (dd, *J* = 8.4, 4.0 Hz, 1H), 7.69 (s, 1H), 7.19 (d, *J* = 8.4 Hz, 2H), 6.90 (d, *J* = 8.8 Hz, 2H), 6.60 (d, *J* = 8.4 Hz, 1H), 4.19 (d, *J* = 1.2 Hz, 2H), 3.72 (s, 3H). <sup>13</sup>C NMR (101 MHz, DMSO-*d*<sub>6</sub>) δ: 165.76, 158.85, 149.75, 149.71, 139.16, 133.52, 133.00, 128.62, 126.52, 125.44, 125.37, 123.48, 119.10, 114.35, 55.58, 50.32, 43.21. MS (ESI) *m/z* = 391 (M+H)<sup>+</sup>. UPLC (mobile phase A): purity 96.5%.

***N*-((5-chloro-8-hydroxyquinolin-7-yl)(3-methoxyphenyl)methyl)butyramide (YUM89, 10).**

The same procedure used for the synthesis of **YUM70** was followed using 5-chloro-8-hydroxyquinoline (116 mg, 0.61 mmol), 3-methoxybenzaldehyde (254 mg, 1.83 mmol), and



butyramide (60 mg, 0.67 mmol) as reactants to yield **YUM89** as a white fluffy solid (153 mg, 65%). <sup>1</sup>H NMR (400 MHz, DMSO-*d*<sub>6</sub>) δ: 10.32 (s, 1H), 8.96 (dd, *J* = 5.6, 1.6 Hz, 1H), 8.73 (d, *J* = 8.8 Hz, 1H), 8.48 (dd, *J* = 8.4, 1.6 Hz, 1H), 7.72 (dd, *J* = 8.8, 4.4 Hz, 1H), 7.70 (s, 1H), 7.23 (t, *J* = 8.0 Hz, 1H), 6.84-6.80 (m, 3H), 6.70 (d, *J* = 8.8 Hz, 1H), 3.71 (s, 3H), 2.21 (t, *J* = 7.2 Hz, 2H), 1.59 (sextet, *J* = 7.6 Hz, 2H), 0.87 (t, *J* = 7.6 Hz, 3H). <sup>13</sup>C NMR (101 MHz, DMSO-*d*<sub>6</sub>) δ: 171.94, 159.76, 149.69, 149.66, 144.12, 139.16, 132.97, 129.96, 126.73, 125.91, 125.29, 123.42, 119.64, 118.99, 113.42, 112.32, 55.47, 49.79, 37.72, 19.28, 14.08. MS (ESI) *m/z* = 385 (M+H)<sup>+</sup>. UPLC (mobile phase A): purity 99.9%.

***N*-((5-chloro-8-hydroxyquinolin-7-yl)(2-chlorophenyl)methyl)butyramide (YUM91, 11)**. The same procedure for the synthesis of **YUM70** was followed using 5-chloro-8-hydroxyquinoline (116 mg, 0.61 mmol), 2-chlorobenzaldehyde (265 mg, 1.83 mmol), and butyramide (60 mg, 0.67 mmol) as reactants to yield **YUM91** as an off-white solid (45 mg, 19%). <sup>1</sup>H NMR (400 MHz, CDCl<sub>3</sub>) δ: 8.83 (dd, *J* = 4.4, 1.6 Hz, 1H), 8.51 (dd, *J* = 8.4, 1.2 Hz, 1H), 7.59 (s, 1H), 7.57 (dd, *J* = 8.4, 4.0 Hz, 1H), 7.50-7.48 (m, 1H), 7.41-7.39 (m, 1H), 7.26-7.23 (m, 2H), 6.87 (d, *J* = 8.0 Hz, 1H), 6.68 (d, *J* = 8.0 Hz, 1H), 2.29 (t, *J* = 7.2 Hz, 2H), 1.74 (sextet, *J* = 7.6 Hz, 2H), 0.99 (t, *J* = 7.2 Hz, 3H). <sup>13</sup>C NMR (101 MHz, DMSO-*d*<sub>6</sub>) δ: 171.72, 150.47, 149.69, 139.50, 139.08, 133.44, 133.00, 130.08, 129.45, 129.20, 127.63, 126.82, 125.50, 124.06, 123.53, 118.60, 48.50, 37.54, 19.28, 14.06. MS (ESI) *m/z* = 389 (M+H)<sup>+</sup>. UPLC (mobile phase A): purity 99.0%.

***N*-((5-chloro-8-hydroxyquinolin-7-yl)(4-chlorophenyl)methyl)butyramide (YUM92, 12)**. The same procedure for the synthesis of **YUM70** was followed using 5-chloro-8-hydroxyquinoline (116 mg, 0.61 mmol), 4-chlorobenzaldehyde (261 mg, 1.83 mmol), and butyramide (60 mg, 0.67 mmol) as reactants to yield **YUM92** as an off-white solid (102 mg, 43%). <sup>1</sup>H NMR (400 MHz, DMSO-*d*<sub>6</sub>) δ: 10.4 (bs, 1H), 8.97 (dd, *J* = 4.4, 1.6 Hz, 1H), 8.77 (d, *J* = 8.4 Hz, 1H), 8.49 (dd, *J* =

8.8, 1.6 Hz, 1H), 7.74 (dd,  $J = 8.8, 4.4$  Hz, 1H), 7.71 (s, 1H), 7.39 (d,  $J = 8.8$  Hz, 2H), 7.27 (d,  $J = 8.4$  Hz, 2H), 6.69 (d,  $J = 8.8$  Hz, 1H), 2.21 (t,  $J = 7.6$  Hz, 2H), 1.56 (sextet,  $J = 7.6$  Hz, 2H), 0.87 (t,  $J = 7.6$  Hz, 3H).  $^{13}\text{C NMR}$  (101 MHz, DMSO- $d_6$ )  $\delta$ : 170.02, 149.76, 149.73, 141.44, 139.14, 133.00, 132.01, 129.28, 128.84, 126.56, 125.41, 123.50, 119.17, 49.49, 37.69, 19.23, 14.08. **MS** (ESI)  $m/z = 389$  (M+H) $^+$ . **UPLC** (mobile phase A): purity 97.3%.

***N*-((5-chloro-8-hydroxyquinolin-7-yl)(3-chlorophenyl)methyl)butyramide (YUM94, 13)**. The same procedure for the synthesis of **YUM70** was followed using 5-chloro-8-hydroxyquinoline (173 mg, 0.92 mmol), 3-chlorobenzaldehyde (388 mg, 2.76 mmol), and butyramide (90 mg, 1.01 mmol) as reactants to yield **YUM94** as a white cotton (180 mg, 50%).  $^1\text{H NMR}$  (400 MHz, DMSO- $d_6$ )  $\delta$ : 10.4 (bs, 1H), 8.97 (dd,  $J = 4.4, 1.6$  Hz, 1H), 8.80 (d,  $J = 8.8$  Hz, 1H), 8.49 (dd,  $J = 8.4, 1.6$  Hz, 1H), 7.74 (dd,  $J = 8.4, 4.0$  Hz, 1H), 7.72 (s, 1H), 7.38-7.30 (m, 3H), 7.24-7.22 (m, 1H), 6.71 (d,  $J = 8.8$  Hz, 1H), 2.22 (t,  $J = 7.2$  Hz, 2H), 1.56 (sextet,  $J = 7.2$  Hz, 2H), 0.87 (t,  $J = 7.2$  Hz, 3H).  $^{13}\text{C NMR}$  (101 MHz, DMSO- $d_6$ )  $\delta$ : 172.08, 149.80, 149.76, 145.00, 139.15, 133.54, 133.01, 130.85, 127.43, 127.01, 126.48, 126.20, 125.46, 125.19, 123.54, 119.22, 49.68, 37.68, 19.22, 14.04. **MS** (ESI)  $m/z = 389$  (M+H) $^+$ . **UPLC** (mobile phase A): purity 98.9%.

***N*-((5-chloro-8-hydroxyquinolin-7-yl)(3-hydroxyphenyl)methyl)butyramide (YUM166, 14)**. The same procedure for the synthesis of **YUM70** was followed using 5-chloro-8-hydroxyquinoline (250 mg, 1.40 mmol), 3-hydroxybenzaldehyde (512 mg, 4.19 mmol), and butyramide (134 mg, 1.54 mmol) as reactants. The product obtained from recrystallization was further purified by column chromatography (*n*-hexane:EtOAc=1:1) to yield **YUM166** as a beige solid (185 mg, 36%).  $^1\text{H NMR}$  (400 MHz,  $\text{CDCl}_3$ )  $\delta$ : 8.81 (d,  $J = 4.0$  Hz, 1H), 8.49 (d,  $J = 8.4$  Hz, 1H), 7.55 (dd,  $J = 8.4, 4.0$  Hz, 1H), 7.51 (s, 1H), 7.14 (t,  $J = 7.6$  Hz, 1H), 7.09 (d,  $J = 8.8$  Hz, 1H), 6.88 – 6.84 (m, 2H), 6.72 (d,  $J = 7.6$  Hz, 1H), 6.50 (d,  $J = 8.4$  Hz, 1H), 2.28 (t,  $J = 7.6$  Hz, 2H), 1.70 (sextet,  $J =$

7.6 Hz, 2H), 0.94 (t,  $J = 7.6$  Hz, 3H).  $^{13}\text{C}$  NMR (101 MHz, DMSO- $d_6$ )  $\delta$ : 171.99, 157.77, 149.64, 149.61, 143.83, 139.10, 132.96, 129.81, 126.83, 125.99, 125.26, 123.38, 119.00, 118.10, 114.44, 114.32, 49.76, 37.70, 19.28, 14.06. MS (ESI)  $m/z = 371$  (M+H) $^+$ . UPLC (mobile phase A): purity 95.1%.

**2-Chloro-*N*-((5-chloro-8-methoxyquinolin-7-yl)(3-methoxyphenyl)methyl)acetamide**

(**YUM227**, **16**). To a stirring solution of **YUM82** (39 mg, 0.10 mmol) in DMF (~4 mL) at room temperature was added potassium carbonate (17 mg, 0.12 mmol) followed by methyl iodide (16 mg, 0.11 mmol) dropwise. The reaction mixture was stirred for 4 hrs, and then concentrated. The resulting residue was diluted with EtOAc, and the organic layer was washed with water (20 mL), sat. NaHCO<sub>3</sub> (aq.) (20 mL), and brine (20 mL), and then concentrated *in vacuo*. The residue was purified by column chromatography (*n*-hexane:EtOAc=3:1) to yield **YUM227** as a white crystal (28 mg, 69%).  $^1\text{H}$  NMR (400 MHz, DMSO- $d_6$ )  $\delta$ : 9.22 (d,  $J = 8.4$  Hz, 1H), 9.03 (dd,  $J = 4.0, 1.6$  Hz, 1H), 8.53 (dd,  $J = 8.8, 1.6$  Hz, 1H), 7.72 (dd,  $J = 8.4, 4.0$  Hz, 1H), 7.71 (s, 1H), 7.27 (td,  $J = 7.6, 1.6$  Hz, 1H), 6.86 – 6.82 (m, 3H), 6.66 (d,  $J = 8.4$  Hz, 1H), 4.24 – 4.16 (m, 2H), 4.03 (s, 3H), 3.72 (s, 3H).  $^{13}\text{C}$  NMR (101 MHz, CDCl<sub>3</sub>)  $\delta$ : 165.38, 159.90, 152.99, 150.08, 143.43, 141.98, 133.37, 133.07, 129.80, 127.24, 126.67, 126.22, 122.12, 118.79, 112.93, 112.42, 62.74, 55.29, 53.93, 42.71. MS (ESI)  $m/z = 405$  (M+H) $^+$ . UPLC (mobile phase A): purity 99.0%.

***N*-((5-chloro-8-methoxyquinolin-7-yl)(3-methoxyphenyl)methyl)butyramide** (**YUM117**, **15**).

The same procedure for the synthesis of **YUM227** was followed using **YUM89** (50 mg, 0.13 mmol), potassium carbonate (22 mg, 0.16 mmol), methyl iodide (21 mg, 0.14 mmol) in DMF (~4 mL). The resulting residue after extraction was purified by column chromatography (*n*-hexane:EtOAc=3:1, EtOAc) to yield **YUM117** as a yellow oil (33 mg, 64%).  $^1\text{H}$  NMR (400 MHz, CDCl<sub>3</sub>)  $\delta$ : 8.97 (d,  $J = 2.4$  Hz, 1H), 8.56 (dd,  $J = 8.8, 1.6$  Hz, 1H), 7.63 (s, 1H), 7.53 (dd,  $J = 8.8,$

4.4 Hz, 1H), 7.24 (t,  $J = 8.0$  Hz, 1H), 6.86 – 6.74 (m, 4H), 6.59 (d,  $J = 8.4$  Hz, 1H), 3.93 (s, 3H), 3.78 (s, 3H), 2.29 (td,  $J = 7.6, 2.4$  Hz, 2H), 1.74 (sextet,  $J = 7.6$  Hz, 2H), 0.99 (t,  $J = 7.2$  Hz, 3H).  $^{13}\text{C}$  NMR (101 MHz,  $\text{CDCl}_3$ )  $\delta$ : 172.29, 159.81, 152.82, 150.03, 143.48, 142.87, 134.23, 133.36, 129.61, 127.07, 126.84, 126.14, 121.96, 118.97, 112.98, 112.19, 62.54, 55.26, 53.40, 38.77, 19.15, 13.83. MS (ESI)  $m/z = 399$  (M+H)<sup>+</sup>. UPLC (mobile phase A): purity 98.6%.

***N*-(Benzo[*d*][1,3]dioxol-5-yl(5-chloro-8-methoxyquinolin-7-yl)methyl)butyramide**

(**YUM245**, **17**). The same procedure for the synthesis of **YUM227** was followed using **YUM70** (33 mg, 0.0827 mmol), potassium carbonate (14 mg, 0.0992 mmol), methyl iodide (13 mg, 0.0910 mmol) in DMF (~4 mL). The resulting residue after extraction was purified by column chromatography (*n*-hexane:EtOAc=3:1, 1:1) to yield **YUM245** as a white solid (24 mg, 70%).  $^1\text{H}$  NMR (400 MHz,  $\text{CDCl}_3$ )  $\delta$ : 8.95 (dd,  $J = 4.4, 1.6$  Hz, 1H), 8.54 (dd,  $J = 8.4, 1.2$  Hz, 1H), 7.58 (s, 1H), 7.51 (dd,  $J = 8.4, 4.0$  Hz, 1H), 6.75 – 6.69 (m, 3H), 6.64 (d,  $J = 8.0$  Hz, 1H), 6.50 (d,  $J = 8.0$  Hz, 1H), 5.92 (d,  $J = 2.0$  Hz, 2H), 3.97 (s, 3H), 2.26 (td,  $J = 7.6, 2.8$  Hz, 2H), 1.71 (sextet,  $J = 7.2$  Hz, 2H), 0.96 (t,  $J = 7.2$  Hz, 3H).  $^{13}\text{C}$  NMR (101 MHz,  $\text{CDCl}_3$ )  $\delta$ : 172.26, 152.73, 150.08, 147.94, 146.84, 143.50, 135.14, 134.21, 133.34, 127.04, 126.60, 126.19, 121.98, 119.90, 108.20, 107.42, 101.17, 62.62, 53.25, 38.75, 19.12, 13.83. MS (ESI)  $m/z = 413$  (M+H)<sup>+</sup>. UPLC (mobile phase A): purity 98.9%.

***N*-(Benzo[*d*][1,3]dioxol-5-yl(8-hydroxyquinolin-7-yl)methyl)butyramide** (**YUM272**, **20**).

8-Hydroxyquinoline (183 mg, 1.26 mmol), piperonal (518 mg, 3.45 mmol), butyramide (100 mg, 1.15 mmol) and ethyl acetate were placed in a microwave tube, the sealed vessel was heated by microwave to 180 °C for 30 min. After cooling to room temperature, the mixture was triturated with ethyl acetate and hexane. The crude solid was purified by column chromatography (*n*-hexane:EtOAc=3:1) to yield **YUM272** as an ivory solid (60 mg, 14%).  $^1\text{H}$  NMR (400 MHz,

DMSO-*d*<sub>6</sub>)  $\delta$ : 9.89 (bs, 1H), 8.85 (dd,  $J = 4.4, 1.6$  Hz, 1H), 8.61 (d,  $J = 8.8$  Hz, 1H), 8.30 (dd,  $J = 8.4, 1.6$  Hz, 1H), 7.55 – 7.52 (m, 2H), 7.41 (d,  $J = 8.4$  Hz, 1H), 6.81 (d,  $J = 8.0$  Hz, 1H), 6.79 (d,  $J = 1.6$  Hz, 1H), 6.70 (dd,  $J = 8.0, 1.2$  Hz, 1H), 6.61 (d,  $J = 8.4$  Hz, 1H), 5.95 (d,  $J = 0.8$  Hz, 2H), 2.18 (td,  $J = 7.2, 2.8$  Hz, 2H), 1.53 (sextet,  $J = 7.2$  Hz, 2H), 0.85 (t,  $J = 7.2$  Hz, 3H). <sup>13</sup>C NMR (75 MHz, DMSO-*d*<sub>6</sub>)  $\delta$ : 171.76, 149.76, 148.79, 147.63, 146.35, 138.47, 137.02, 136.48, 127.90, 126.64, 125.39, 122.17, 120.57, 117.77, 108.40, 107.89, 101.33, 49.91, 37.68, 19.28, 14.12. MS (ESI)  $m/z = 365$  (M+H)<sup>+</sup>, 363 (M-H)<sup>-</sup>. HPLC (mobile phase A): purity 97.1%.

**Methyl 2-(3-(butyramido(5-chloro-8-hydroxyquinolin-7-yl)methyl)phenoxy)acetate (YUM347A, 21).** YUM166 (130 mg, 0.35 mmol), methyl chloroacetate (0.034 mL, 0.385 mmol), and potassium carbonate (58 mg, 0.42 mmol) were added in anhydrous DMF (2 mL), and the reaction mixture was heated at 80 °C for overnight. After cooling to room temperature, the residue was partitioned between water and ethyl acetate, and the aqueous layer was extracted with EtOAc. The combined organic phase was dried over Na<sub>2</sub>SO<sub>4</sub>, and concentrated *in vacuo*. The resulting residue was purified using column chromatography (DCM:EtOAc=10:1, 5:1, *n*-Hexane:EtOAc=1:1, EtOAc) to obtain YUM347A as a beige crystal (72 mg, 46%). <sup>1</sup>H NMR (300 MHz, CDCl<sub>3</sub>)  $\delta$ : 8.86 (d,  $J = 3.0$  Hz, 1H), 8.52 (d,  $J = 8.4$  Hz, 1H), 8.04 (d,  $J = 9.0$  Hz, 1H), 7.62 (s, 1H), 7.49 (dd,  $J = 8.4, 3.9$  Hz, 1H), 7.05 (t,  $J = 7.8$  Hz, 1H), 6.77 (s, 1H), 6.69 – 6.66 (m, 2H), 6.48 (d,  $J = 9.0$  Hz, 1H), 5.27 (d,  $J = 15.9$  Hz, 1H), 4.53 (d,  $J = 15.9$  Hz, 1H), 3.74 (s, 3H), 2.30 (td,  $J = 7.5, 3.0$  Hz, 2H), 1.70 (sextet,  $J = 7.5$  Hz, 2H), 0.92 (t,  $J = 7.5$  Hz, 3H). <sup>13</sup>C NMR (75 MHz, CDCl<sub>3</sub>)  $\delta$ : 173.46, 170.53, 156.77, 150.63, 149.67, 142.64, 142.30, 133.71, 133.55, 129.49, 127.99, 126.89, 126.30, 122.04, 117.80, 114.70, 113.85, 70.53, 54.36, 52.17, 38.56, 19.18, 13.82. MS (ESI)  $m/z = 443$  (M+H)<sup>+</sup>, 441 (M-H)<sup>-</sup>. HPLC: purity 98.6%.

**2-(3-(Butyramido(5-chloro-8-hydroxyquinolin-7-yl)methyl)phenoxy)acetic acid (YUM354, 22).** To a solution of **YUM347A** (43 mg, 0.097 mmol) in MeOH (2 mL) was added 50% NaOH (40 drops), and the mixture was stirred at room temperature for 1 hr. After neutralization with 3 eq of 1N HCl, the precipitate was filtered, washed with ice-water, and dried to obtain **YUM354** as a beige solid (14 mg, 34%). **<sup>1</sup>H NMR** (400.1 MHz, CDCl<sub>3</sub>) δ: 8.97 (d, *J* = 2.4 Hz, 1H), 8.56 (dd, *J* = 8.8, 1.6 Hz, 1H), 7.63 (s, 1H), 7.53 (dd, *J* = 8.8, 4.4 Hz, 1H), 7.24 (t, *J* = 8.0 Hz, 1H), 6.86 – 6.74 (m, 4H), 6.59 (d, *J* = 8.4 Hz, 1H), 3.93 (s, 3H), 3.78 (s, 3H), 2.29 (td, *J* = 7.6, 2.4 Hz, 2H), 1.74 (sextet, *J* = 7.6 Hz, 2H), 0.99 (t, *J* = 7.2 Hz, 3H). **<sup>13</sup>C NMR** (100.6 MHz, CDCl<sub>3</sub>) δ: 172.29, 159.81, 152.82, 150.03, 143.48, 142.87, 134.23, 133.36, 129.61, 127.07, 126.84, 126.14, 121.96, 118.97, 112.98, 112.19, 62.54, 55.26, 53.40, 38.77, 19.15, 13.83. **MS** (ESI) *m/z* = 429 (M+H)<sup>+</sup>, 427 (M-H)<sup>-</sup>. **UPLC**: purity 98.6%.

**3-(Butyramido(5-chloro-8-hydroxyquinolin-7-yl)methyl)benzoic acid (YUM401, 23).** The same procedure for the synthesis of **YUM70** was followed using 5-chloro-8-hydroxyquinoline (350 mg, 1.95 mmol), 3-carboxybenzaldehyde (586 mg, 3.9 mmol), and butyramide (186 mg, 2.14 mmol) to obtain **YUM401** as an off-white solid (461 mg, 59%) after washing the crude product with diethyl ether and methanol. **<sup>1</sup>H NMR** (300 MHz, DMSO-*d*<sub>6</sub>) δ: 12.98 (s, 1H), 10.43 (s, 1H), 8.97 (d, *J* = 3.3 Hz, 1H), 8.85 (d, *J* = 8.8 Hz, 1H), 8.50 (d, *J* = 8.6 Hz, 1H), 7.88 – 7.79 (m, 2H), 7.77 – 7.70 (m, 2H), 7.55 – 7.42 (m, 2H), 6.77 (d, *J* = 8.6 Hz, 1H), 2.22 (t, *J* = 7.2 Hz, 2H), 1.56 (sextet, *J* = 7.2 Hz, 2H), 0.87 (t, *J* = 7.3 Hz, 3H). **<sup>13</sup>C NMR** (75 MHz, DMSO-*d*<sub>6</sub>) δ: 172.05, 167.60, 149.77, 142.93, 139.10, 133.02, 132.01, 131.34, 129.24, 128.42, 128.08, 126.54, 125.40, 123.53, 119.13, 49.77, 37.67, 19.25, 14.05. **MS** (ESI) *m/z* = 399 (M+H)<sup>+</sup>, 397 (M-H)<sup>-</sup>. **HPLC** (mobile phase A): purity 97.5%.

***N*-((5-Chloro-8-hydroxyquinolin-7-yl)(3-cyanophenyl)methyl)butyramide (YUM402, 24).**

The same procedure for the synthesis of **YUM70** was followed using 5-chloro-8-hydroxyquinoline (200 mg, 1.11 mmol), 3-cyanobenzaldehyde (292 mg, 2.227 mmol), and butyramide (106 mg, 1.22 mmol) to obtain **YUM402** as an ivory solid (8 mg, 2%) after purification by column chromatography (*n*-Hexane:EtOAc=3:1) followed by recrystallization from ethanol. **<sup>1</sup>H NMR** (300 MHz, CDCl<sub>3</sub>+2 drops of MeOD) δ: 8.85 (d, *J* = 4.0 Hz, 1H), 8.54 (d, *J* = 8.4 Hz, 1H), 7.64 – 7.57 (m, 3H), 7.56 – 7.51 (m, 2H), 7.41 (t, *J* = 8.0 Hz, 1H), 6.53 (s, 1H), 2.30 (t, *J* = 7.5 Hz, 2H), 1.72 (d, *J* = 7.5 Hz, 2H), 0.97 (t, *J* = 7.4 Hz, 3H). **<sup>13</sup>C NMR** (75 MHz, DMSO-*d*<sub>6</sub>) δ: 172.20, 149.90, 149.80, 143.95, 139.14, 133.04, 132.49, 131.37, 130.65, 130.27, 126.37, 125.54, 124.77, 123.62, 119.28, 119.18, 111.83, 49.78, 37.63, 19.18, 14.04. **MS** (ESI) *m/z* = 380 (M+H)<sup>+</sup>. **HPLC** (mobile phase B): purity 95%.

***N*-(Benzo[*d*][1,3]dioxol-5-yl(5-bromo-8-hydroxyquinolin-7-yl)methyl)butyramide**

**(YUM411, 25).** The same procedure for the synthesis of **YUM70** was followed using 5-bromoquinoline-8-ol (300 mg, 1.339 mmol), piperonal (402 mg, 2.678 mmol), and butyramide (128 mg, 1.473 mmol) to obtain **YUM411** as a tan solid (14 mg, 2%). **<sup>1</sup>H NMR** (300 MHz, DMSO-*d*<sub>6</sub>) δ: 10.39 (bs, 1H), 8.93 (s, 1H), 8.68 (d, *J* = 8.3 Hz, 1H), 8.41 (d, *J* = 7.5 Hz, 1H), 7.87 (s, 1H), 7.71 (d, *J* = 4.0 Hz, 1H), 6.91 – 6.76 (m, 2H), 6.70 (d, *J* = 7.5 Hz, 1H), 6.60 (d, *J* = 7.5 Hz, 1H), 5.96 (s, 2H), 2.19 (t, *J* = 6.6 Hz, 2H), 1.54 (sextet, *J* = 7.2 Hz, 2H), 0.85 (t, *J* = 6.6 Hz, 3H). **<sup>13</sup>C NMR** (75 MHz, DMSO-*d*<sub>6</sub>) δ: 171.83, 150.11, 149.66, 147.74, 146.56, 139.35, 136.36, 135.42, 129.96, 126.83, 126.54, 123.73, 120.54, 108.92, 108.51, 107.81, 101.42, 49.64, 37.68, 19.25, 14.07. **MS** (ESI) *m/z* = 444 (M+H)<sup>+</sup>, 442 (M-H)<sup>-</sup>. **HPLC** (mobile phase B): purity 98.8%.

***N*-((5-Chloro-8-(((2*E*,6*E*)-3,7,11-trimethyldodeca-2,6,10-trien-1-yl)oxy)quinolin-7-yl)(3-chlorophenyl)methyl)butyramide (YUM137, 26).** To a dried flask were added **YUM194** (97

mg, 0.25 mmol), triphenylphosphine (72 mg, 0.275 mmol), and trans-farnesol (61 mg, 0.275 mmol) in THF with stirring, and the flask was covered by rubber septum. While stirring, DEAD (40% in toluene, 120 mg, 0.275 mmol) was added dropwise, and the reaction mixture was heated at 60 °C for overnight. After cooling, the resulting residue was concentrated under reduced pressure, and then purified by column chromatography (*n*-Hexane:EtOAc=5:1) to afford **YUM137** as an ivory solid (24 mg, 28%). **<sup>1</sup>H NMR** (400 MHz, CDCl<sub>3</sub>) δ: 8.96 (dd, *J* = 4.0, 1.6 Hz, 1H), 8.55 (dd, *J* = 8.4, 1.6 Hz, 1H), 7.61 (s, 1H), 7.53 (dd, *J* = 8.4, 4.0 Hz, 1H), 7.27 (s, 1H), 7.23 – 7.21 (m, 2H), 7.15 – 7.12 (m, 1H), 6.99 (d, *J* = 8.8 Hz, 1H), 6.56 (d, *J* = 8.4 Hz, 1H), 5.39 (td, *J* = 6.8, 0.8 Hz, 1H), 5.16 – 5.09 (m, 3H), 4.39 (dd, *J* = 10.8, 6.8 Hz, 1H), 2.28 (td, *J* = 8.0, 4.4 Hz, 2H), 2.11 – 1.97 (m, 8H), 1.78 – 1.71 (m, 2H), 1.70 (s, 3H), 1.62 (s, 9H), 0.98 (t, *J* = 7.2 Hz, 3H). **MS** (ESI) *m/z* = 593 (M+H)<sup>+</sup>, 615 (M+Na)<sup>+</sup>.

***N*-((5-Chloro-8-hydroxyquinolin-7-yl)(3-(((2*E*,6*E*)-3,7,11-trimethyldodeca-2,6,10-trien-1-yl)oxy)phenyl)methyl)butyramide (YUM168, 27)**. The same procedure for the synthesis of **YUM137** was followed using **YUM166** (100 mg, 0.269 mmol), triphenylphosphine (78 mg, 0.296 mmol), trans-farnesol (66 mg, 0.296 mmol), and DEAD (40% in toluene, 129 mg, 0.296 mmol) to obtain **YUM168** as a yellow solid (55 mg, 36%). **<sup>1</sup>H NMR** (400 MHz, CDCl<sub>3</sub>) δ: 8.92 (dd, *J* = 4.0, 1.6 Hz, 1H), 8.52 (dd, *J* = 8.4, 1.6 Hz, 1H), 7.56 (s, 1H), 7.49 (dd, *J* = 8.8, 4.4 Hz, 1H), 7.27 (s, 1H), 7.13 (t, *J* = 8.0 Hz, 1H), 6.96 (d, *J* = 8.4 Hz, 1H), 6.77 (d, *J* = 7.6 Hz, 1H), 6.70 – 6.68 (m, 2H), 6.50 (d, *J* = 8.8 Hz, 1H), 5.71 (s, 1H), 5.42 (t, *J* = 6.8 Hz, 1H), 5.11 – 5.02 (m, 3H), 4.42 (dd, *J* = 10.8, 6.8 Hz, 1H), 2.24 (td, *J* = 7.6, 4.4 Hz, 2H), 2.06 – 1.95 (m, 8H), 1.75 – 1.68 (m, 5H), 1.59 (s, 9H), 0.95 (t, *J* = 7.2 Hz, 3H). **MS** (ESI) *m/z* = 575.19 (M+H)<sup>+</sup>, **HPLC** (mobile phase A): purity 96.0%.



## Scheme 2. Synthesis of BODIPY conjugated YUM401 (YUM488)

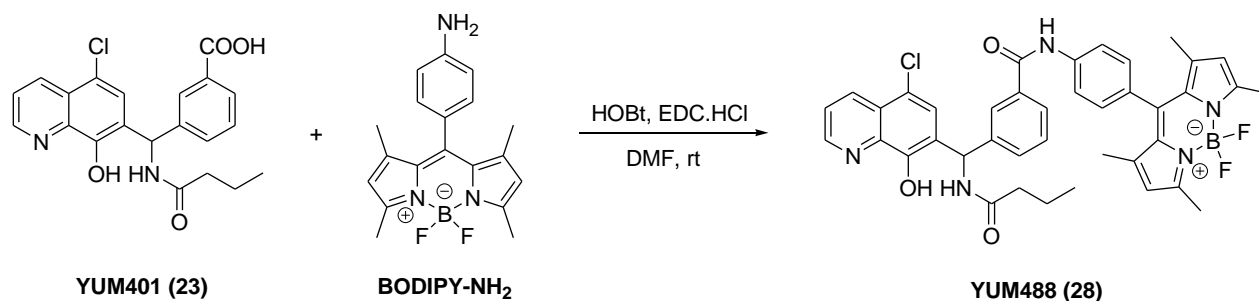

**3-(Butyramido(5-chloro-8-hydroxyquinolin-7-yl)methyl)-N-(4-(5,5-difluoro-1,3,7,9-tetramethyl-5H-4λ<sup>4</sup>,5λ<sup>4</sup>-dipyrrolo[1,2-c:2',1'-f][1,3,2]diazaborinin-10-yl)phenyl)benzamide (YUM488, 28).** To a stirred solution of **YUM401** (30 mg, 0.075 mmol) in DMF was added HOBT (10 mg, 0.075 mmol) and EDC.HCl (14 mg, 0.075 mmol) at 0 °C. The mixture was stirred for 15 min at 0 °C, and for 1 hr at room temperature. Then, **BODIPY-NH<sub>2</sub>** (26 mg, 0.075 mmol) was added and the reaction mixture was stirred for overnight at room temperature. The mixture was diluted with brine and extracted with ethyl acetate, and the organic phase was concentrated under reduced pressure. The resulting residue was triturated with ethyl acetate and dichloromethane to obtain **YUM488** (17 mg, 31%) as an orange solid. <sup>1</sup>H NMR (300 MHz, DMSO-*d*<sub>6</sub>) δ: 10.53 (s, 1H), 8.98 (dd, *J* = 4.2, 1.5 Hz, 1H), 8.86 (d, *J* = 8.6 Hz, 1H), 8.50 (dd, *J* = 8.6, 1.6 Hz, 1H), 7.95 (d, *J* = 8.6 Hz, 2H), 7.87 – 7.84 (m, 2H), 7.76 – 7.72 (m, 2H), 7.53 – 7.48 (m, 2H), 7.33 (d, *J* = 8.4 Hz, 2H), 6.81 (d, *J* = 8.6 Hz, 1H), 6.19 (s, 2H), 2.45 (s, 6H), 2.24 (t, *J* = 7.3 Hz, 2H), 1.58 (sextet, *J* = 7.3 Hz, 2H), 1.42 (s, 6H), 0.88 (t, *J* = 7.4 Hz, 3H). MS (ESI) *m/z* = 720 (M+H)<sup>+</sup>, 700 (M-F)<sup>+</sup>, 718 (M-H)<sup>-</sup>. HPLC (mobile phase A): purity 97.6%.

### Scheme 3. Synthesis of PROTAC conjugate to YUM401 (YUM513)

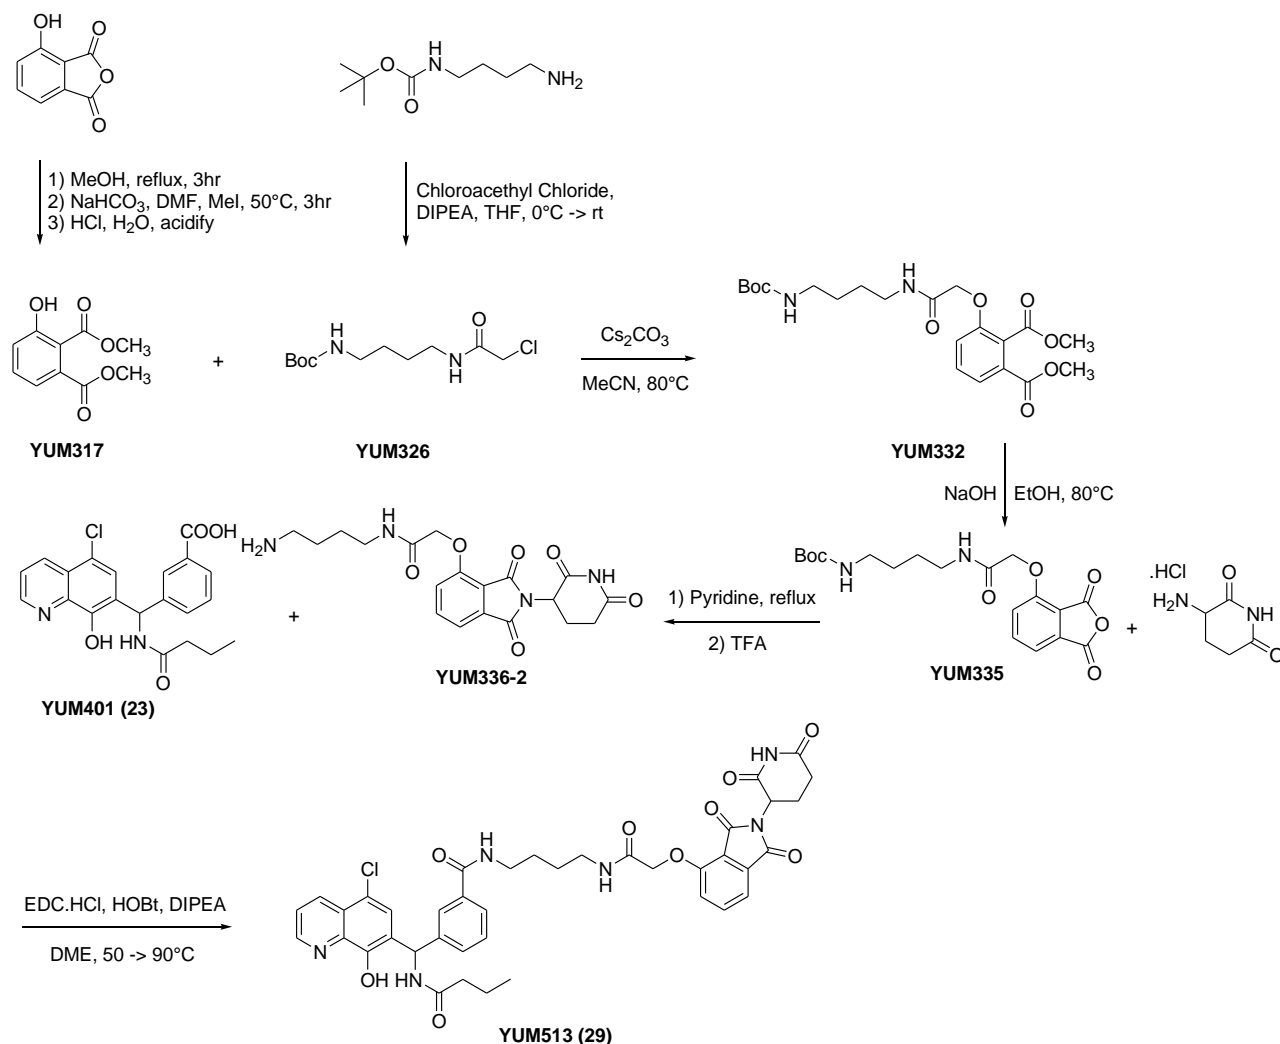

**Tert-butyl (4-(2-chloroacetamido)butyl)carbamate (YUM326)**. To a solution of *N*-*tert*-butyl-4-aminobutan-1-amine (1.0 mL, 5.22 mmol) in anhydrous THF was added chloroacetyl chloride (0.57 mL, 5.74 mmol) and DIPEA (0.91 mL, 5.22 mmol) in the ice bath. The resulting solution was allowed to warm at room temperature for 3 hrs. The reaction mixture was then diluted with EtOAc and water. The organic layer was separated, washed with water, dried over Na<sub>2</sub>SO<sub>4</sub> and concentrated to obtain **YUM326** as an ivory solid (1.3 g, 97%). <sup>1</sup>H NMR (300 MHz, CDCl<sub>3</sub>) δ:

6.66 (bs, 1H), 4.58 (bs, 1H), 4.05 (s, 1H), 3.33 (q,  $J = 6.3$  Hz, 2H), 3.14 (q,  $J = 6.3$  Hz, 2H), 1.60 – 1.50 (m, 4H), 1.44 (s, 9H).

**Dimethyl 3-hydroxyphthalate (YUM317).** A mixture of 3-hydroxy phthalic anhydride (250 mg, 1.52 mmol) in MeOH was refluxed for 3 hrs. The mixture was cooled and concentrated, and the resulting residue was suspended in the solution of NaHCO<sub>3</sub> (358 mg, 4.25 mmol) in DMF followed by addition of iodomethane (0.23 mL, 3.64 mmol). The reaction mixture was heated at 50 °C for 3 hrs, and then acidified with 4N HCl and aqueous layer was extracted with EtOAc. The combined organic layer was washed with water and brine, dried over Na<sub>2</sub>SO<sub>4</sub>, and concentrated. The crude product was purified by column chromatography (*n*-Hexane:EtOAc=1:1) to obtain **YUM317** as a yellow liquid (300 mg, 94%). <sup>1</sup>H NMR (300 MHz, CDCl<sub>3</sub>)  $\delta$ : 10.57 (s, 1H), 7.46 (t,  $J = 7.8$  Hz, 1H), 7.08 (dd,  $J = 8.7, 1.2$  Hz, 1H), 6.96 (dd,  $J = 7.5, 1.2$  Hz, 1H), 3.92 (s, 3H), 3.89 (s, 3H).

**Dimethyl 3-(2-((4-((tert-butoxycarbonyl)amino)butyl)amino)-2-oxoethoxy)phthalate (YUM332).** A solution of **YUM317** (1.1 g, 5.23 mmol) in MeCN was treated with **YUM326** (1.26 g, 4.76 mmol) and Cs<sub>2</sub>CO<sub>3</sub> (4.19 g, 12.8 mmol). The resulting mixture was heated at 80 °C for 12 hrs, and then concentrated under reduced pressure. The residue was then diluted with EtOAc and water, and the combined organic layer was separated, washed with water, dried over Na<sub>2</sub>SO<sub>4</sub> and concentrated. The crude product was purified by column chromatography (DCM:MeOH=10:1) to obtain **YUM332** as a yellow liquid (1.63 g, 78%). <sup>1</sup>H NMR (300 MHz, CDCl<sub>3</sub>)  $\delta$ : 7.64 (d,  $J = 7.8$  Hz, 1H), 7.48 (t,  $J = 8.1$  Hz, 1H), 7.14 (d,  $J = 8.4$  Hz, 1H), 7.05 (bs, 1H), 4.60 (s, 3H), 3.95 (s, 3H), 3.91 (s, 3H), 3.32 (q,  $J = 6.5$  Hz, 2H), 3.15 – 3.10 (m, 2H), 1.64 – 1.47 (m, 4H), 1.44 (s, 9H).

**Tert-butyl (4-(2-((1,3-dioxo-1,3-dihydroisobenzofuran-4-yl)oxy)acetamido)butyl)carbamate (YUM335).** To a solution of **YUM332** (1.6 g, 3.65 mmol) in EtOH was added 3N NaOH (3.65 mL, 10.9 mmol), and the resulting mixture was heated at 80 °C for 2 hrs. The reaction mixture was

concentrated under reduced pressure, and the crude mixture was dissolved in water and EtOAc, and then acidified using 1N HCl. The combined organic layer was separated, washed with water, dried over Na<sub>2</sub>SO<sub>4</sub>, and concentrated under reduced pressure to obtain **YUM335** as a yellow solid (540 mg, 38%). <sup>1</sup>H NMR (300 MHz, CDCl<sub>3</sub>) δ: 7.64 (d, *J* = 7.2 Hz, 1H), 7.46 (t, *J* = 8.1 Hz, 1H), 7.22 (bs, 1H), 7.14 (d, *J* = 8.4 Hz, 1H), 4.62 (s, 2H), 3.35 (d, *J* = 5.1 Hz, 2H), 3.14 (bs, 2H), 1.57 (bs, 4H), 1.45 (s, 9H).

***N*-(4-Aminobutyl)-2-((2-(2,6-dioxopiperidin-3-yl)-1,3-dioxoisindolin-4-yl)oxy)acetamide (YUM336-2)**. To a solution of **YUM335** (540 mg, 1.37 mmol) in pyridine was added 3-aminopiperidine-2,6-dione HCl (227 mg, 1.37 mmol), and the resulting solution was heated under reflux for 12 hrs. After cooling, the reaction mixture was concentrated under reduced pressure, and the crude Boc-protected intermediate was purified by column chromatography (DCM:MeOH=10:1). The Boc-protected intermediate was dissolved in DCM and treated with TFA, and the reaction mixture was heated at 50 °C for 2 hrs. The crude product was purified by crystallization from EtOAc to obtain **YUM336-2** as an ivory solid (99 mg, 19%). <sup>1</sup>H NMR (300 MHz, MeOD) δ: 8.19 (t, *J* = 7.0 Hz, 1H), 7.82 (t, *J* = 7.8 Hz, 1H), 7.56 (d, *J* = 7.3 Hz, 1H), 7.45 (d, *J* = 8.5 Hz, 1H), 5.14 (dd, *J* = 12.4, 5.4 Hz, 1H), 4.78 (s, 2H), 3.40 – 3.37 (m, 2H), 2.96 (t, *J* = 6.6 Hz, 2H), 2.90 – 2.64 (m, 3H), 2.18 – 2.10 (m, 1H), 1.72 – 1.64 (m, 4H).

**3-(Butyramido(5-chloro-8-hydroxyquinolin-7-yl)methyl)-*N*-(4-(2-((2-(2,6-dioxopiperidin-3-yl)-1,3-dioxoisindolin-4-yl)oxy)acetamido)butyl)benzamide (YUM513, 29)**. To a solution of **YUM401** (15 mg, 0.037 mmol), EDC.HCl (7.2 mg, 0.037 mmol), HOBT (6.1 mg, 0.045 mmol) and DIPEA (14.5 mg, 0.112 mmol) in DMF was added **YUM336-2** (19 mg, 0.037 mmol). The reaction mixture was heated at 50 °C for 16 hrs, and then cooled down to room temperature. The mixture was diluted with EtOAc, washed with water and brine, dried over Na<sub>2</sub>SO<sub>4</sub>, and

concentrated. The crude product was purified by column chromatography (DCM, DCM:0.5M NH<sub>4</sub> in MeOH=10:1) to obtain **YUM513**. MS (ESI)  $m/z$  = 783 (M+H)<sup>+</sup>, 781 (M-H)<sup>-</sup>. HPLC (mobile phase A): purity 94%.

#### Scheme 4. The synthesis of DX2-145

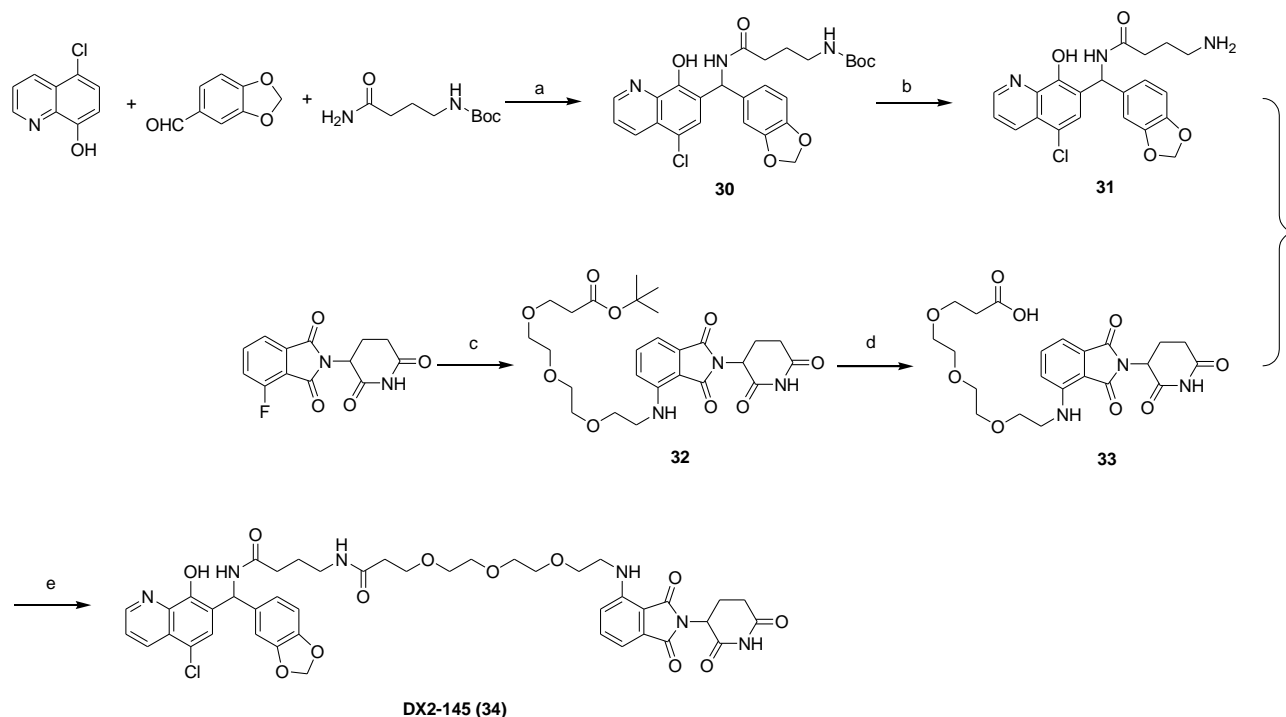

Reagents and conditions: a) neat, microwave, 140°C, overnight; b) TFA, DCM, rt, 2h; c) *tert*-butyl 3-(2-(2-(2-aminoethoxy)ethoxy)ethoxy)propanoate, DIEA, DMF, 90°C, overnight; d) TFA, DCM, 3h, rt; e) HATU, DIEA, DMF, overnight.

The synthesis of the PROTAC molecule **DX2-145** consists of the generation of both the modified **YUM70** derivative **31** as well as a PEG3-pomalidomide chimera part **33**. The synthesis of **31**, with an additional amino group on the side chain of **YUM70** to facilitate the attachment with the linker part, started with a three-component Betti reaction under a neat condition generating intermediate **30**. A subsequent acidic deprotection with TFA yielded **31**. A S<sub>N</sub>Ar reaction between 2-(2,6-dioxopiperidin-3-yl)-4-fluoroisindoline-1,3-dione and *tert*-butyl 3-(2-(2-(2-

aminoethoxy)ethoxy)ethoxy)propanoate gave rise to **32**. The *tert*-butyl ester of **32** was then hydrolyzed with TFA in DCM to give the other key intermediate **33**. The coupling reaction between **31** and **33** in the presence of HATU and DIEA in DMF yielded the final product **DX2-145**.

***tert*-Butyl (4-((benzo[*d*][1,3]dioxol-5-yl(5-chloro-8-hydroxyquinolin-7-yl)methyl)amino)-4-oxobutyl)carbamate (30)**. A mixture of 5-chloro-8-hydroxyquinoline (500 mg, 2.78 mmol), benzo[*d*][1,3]dioxole-5-carbaldehyde (1.25 g, 8.33 mmol) and *tert*-butyl (4-amino-4-oxobutyl)carbamate (510 mg, 2.52 mmol) were mixed and heated at 140 °C. The solids melted upon heating to generate a brown mixture that was stirred at the same temperature overnight. The mixture was taken up by EtOAc, filtered and washed with EtOAc to give **30** as a white solid (748 mg, 52%). <sup>1</sup>H NMR (400 MHz, DMSO-*d*<sub>6</sub>) δ 10.31 (s, 1H), 8.96 (dd, *J* = 4.2, 1.6 Hz, 1H), 8.69 (d, *J* = 8.7 Hz, 1H), 8.49 (dd, *J* = 8.6, 1.6 Hz, 1H), 7.75 – 7.70 (m, 2H), 6.86 – 6.82 (m, 2H), 6.80 (t, *J* = 5.6 Hz, 1H), 6.74 – 6.70 (m, 1H), 6.61 (d, *J* = 8.7 Hz, 1H), 5.97 (s, 2H), 2.92 (q, *J* = 6.7 Hz, 2H), 2.21 (td, *J* = 7.4, 2.7 Hz, 2H), 1.62 (p, *J* = 7.3 Hz, 2H), 1.37 (s, 9H). LC-MS (ESI) *m/z* 514.2 [M + H]<sup>+</sup>.

**4-Amino-N-(benzo[*d*][1,3]dioxol-5-yl(5-chloro-8-hydroxyquinolin-7-yl)methyl)butanamide (31)**. To a solution of **30** (67 mg, 0.13 mmol) in DCM (2 mL) was added TFA (0.4 mL). The resulting solution was stirred at room temperature for 2h and concentrated to give **31** as a light yellow gel (50 mg, 92%), which was used in the next step without further purification. <sup>1</sup>H NMR (300 MHz, MeOD) δ 8.95 (dd, *J* = 4.4, 1.5 Hz, 1H), 8.68 (dd, *J* = 8.6, 1.5 Hz, 1H), 7.75 (dd, *J* = 8.6, 4.4 Hz, 1H), 7.58 (s, 1H), 6.83 – 6.74 (m, 3H), 6.68 (s, 1H), 5.94 (s, 2H), 2.99 (t, *J* = 7.6 Hz, 2H), 2.51 (td, *J* = 7.1, 2.1 Hz, 2H), 2.05 – 1.86 (m, 2H). LC-MS (ESI) *m/z* 414.1 [M + H]<sup>+</sup>.

**tert-Butyl 3-(2-(2-(2-((2-(2,6-dioxopiperidin-3-yl)-1,3-dioxoisindolin-4-yl)amino)ethoxy)ethoxy)ethoxy)propanoate (32).** To a solution of 2-(2,6-dioxopiperidin-3-yl)-4-fluoroisindoline-1,3-dione (80 mg, 0.29 mmol) and *tert*-butyl 3-(2-(2-(2-aminoethoxy)ethoxy)ethoxy)propanoate (80 mg, 0.29 mmol) in DMF (4 mL) was added DIEA (75 mg, 0.58 mmol) and the mixture was heated at 90 °C overnight. The mixture was then diluted with EtOAc, washed with water, brine, dried over anhydrous Na<sub>2</sub>SO<sub>4</sub>, and purified with flash chromatography (50% EtOAc in hexane) to give **32** (57 mg, 37%) as a white solid. <sup>1</sup>H NMR (300 MHz, MeOD) δ 7.53 (dd, *J* = 8.5, 7.2 Hz, 1H), 7.05 (t, *J* = 7.9 Hz, 2H), 5.07 (dd, *J* = 12.3, 5.4 Hz, 1H), 3.77 – 3.55 (m, 12H), 3.49 (t, *J* = 5.3 Hz, 2H), 2.92 – 2.62 (m, 3H), 2.46 (td, *J* = 6.2, 0.9 Hz, 2H), 2.19 – 2.09 (m, 1H), 1.44 (s, 9H). LC-MS (ESI) *m/z* 534.2 [M + H]<sup>+</sup>.

**3-(2-(2-(2-((2-(2,6-Dioxopiperidin-3-yl)-1,3-dioxoisindolin-4-yl)amino)ethoxy)ethoxy)ethoxy)propanoic acid (33).** To a solution of **32** (57 mg, 0.11 mmol) in DCM (2 mL) was added TFA (0.4 mL). The resulting solution was stirred at room temperature for 3h and concentrated to give **33** as a light yellow gel (51 mg, 98%), which was used in the next step without further purification. LC-MS (ESI) *m/z* 478.1 [M + H]<sup>+</sup>.

***N*-(Benzo[*d*][1,3]dioxol-5-yl(5-chloro-8-hydroxyquinolin-7-yl)methyl)-4-(3-(2-(2-(2-((2-(2,6-dioxopiperidin-3-yl)-1,3-dioxoisindolin-4-yl)amino)ethoxy)ethoxy)ethoxy)propanamido)butanamide (DX2-145).** To a solution of **33** (57 mg, 0.12 mmol) and HATU (68 mg, 0.18 mmol) in DMF (2 mL) was added **31** (49 mg, 0.12 mmol) followed by DIEA (46 mg, 0.16 mmol). The resulting mixture was stirred at room temperature overnight. The mixture was then diluted with EtOAc, washed with water, brine, dried over anhydrous Na<sub>2</sub>SO<sub>4</sub>, and purified with preparative HPLC (10-95% CH<sub>3</sub>CN in H<sub>2</sub>O, 0.05% formic acid as additive) to give **DX2-145** (57 mg, 37%) as a white solid. <sup>1</sup>H NMR (400 MHz, MeOD) δ 8.88 (dt, *J* = 4.1, 1.9 Hz, 1H), 8.49 (ddd, *J* = 8.6, 2.7, 1.

5 Hz, 1H), 7.61 (dddd,  $J = 8.6, 4.3, 2.3, 0.9$  Hz, 1H), 7.55 (s, 1H), 7.51 (dddd,  $J = 8.4, 7.1, 3.6, 1.2$  Hz, 1H), 7.02 (td,  $J = 6.9, 2.8$  Hz, 2H), 6.84 – 6.74 (m, 3H), 6.68 – 6.65 (m, 1H), 5.91 (d,  $J = 1.2$  Hz, 2H), 5.04 (ddt,  $J = 12.4, 5.4, 1.1$  Hz, 1H), 3.72 – 3.64 (m, 4H), 3.64 – 3.54 (m, 8H), 3.44 (td,  $J = 5.3, 2.4$  Hz, 2H), 3.24 (t,  $J = 6.8$  Hz, 2H), 2.91 – 2.63 (m, 3H), 2.44 – 2.33 (m, 4H), 2.14 – 2.06 (m, 1H), 1.83 (p,  $J = 7.2$  Hz, 2H). LC-MS (ESI)  $m/z$  873.3  $[M + H]^+$ . Purity 99.6%.

## **MATERIALS and METHODS**

### **MTT assay**

Cytotoxicity was assessed by 3-(4,5-dimethylthiazol-2-yl)-2, 5-diphenyltetrazolium bromide (MTT) assay as previously described (7). Cells were seeded in 96-well plates at 3000-7000 cells/well depending on the cell line. After overnight incubation, cells were treated with indicated compounds for 72 hr. After treatment, MTT (0793, VWR) solution was added to the wells to a final concentration of 0.3 mg/ml and incubated for 4 hr at 37 °C. The supernatant was removed and 100  $\mu$ l of DMSO was added to wells. Then the plates were shaken for 15 min at room temperature and absorbance was measured at 570 nm.

### **Colony formation assay**

Cells were plated in 96-well plates at 200 cells/well. After overnight attachment, compounds were added to the wells at sequential dilutions. Cells were kept in culture until visible colonies formed in control wells. Colonies were then fixed, stained with 0.05% crystal violet solution (2% formaldehyde, 40% methanol in distilled water), washed with water to remove excess stain, and imaged with Odyssey Imaging Systems (LI-COR Biosciences, Lincoln, NE).

### **Human liver microsomal stability study *in vitro***

Microsomal stability of YUM70 (1  $\mu$ M) was determined at 37 °C in 0.5 mg/mL human liver microsomes and 1 mM NADPH cofactor in a total volume of 400  $\mu$ L of 100 mM potassium



phosphate buffer (pH 7.4 containing 3.3 mM MgCl<sub>2</sub>). The reactions were stopped at 0, 5, 10, 15, 30, and 60 min, by adding threefold the volume of CH<sub>3</sub>CN. The collected fractions were centrifuged for 5 min at 14000 rpm and the supernatant (5 µl) was collected for LC–MS/MS analyses. The amount of parent compound remaining was determined. The natural logarithm of the amount of parent compound remaining was plotted against time to calculate the rate of disappearance and half-life of the tested compounds.

### **Short pharmacokinetic study**

Plasma concentration of YUM70 was determined in CD-1 mouse following intravenous (IV) and *per os* (PO) administration of YUM70. The drug solution was directly prepared in citrate buffer at 2 mg/mL, and then was diluted with sterile saline (1:1), 1 mg/mL drug solution was obtained for oral gavage (30 mg/Kg) and IV injection (15 mg/kg). At the given time point, blood samples were collected using heparinized calibrated pipettes. Samples were centrifuged at 15000 rpm for 10 min. Subsequently, blood plasma was collected from the upper layer. The plasma was frozen at -80 °C for later analysis.

### **Protein expression and purification**

The His-tagged recombinant proteins were expressed in *E.Coli*. BL21 (DE3) pRARE2 (Rosetta 2 (DE3); Novagen) and purified as described previously (8). Briefly, GRP78 plasmids were transformed into Rosetta 2 cells, which were then grown in TB broth supplemented with 8 g/L glycerol, 50 µg/mL kanamycin or 100 µg/mL ampicillin at 37 °C to an OD<sub>600</sub> of approximately 1.5-2. The culture was allowed to cool to 18 °C over a period of 1 h and induced with 0.5 mM isopropyl thio-β-D-galactoside for 18 hr. Bacterial cells were harvested by centrifugation at 4000 × g for 20 min at 4 °C and the cell pellet was resuspended in lysis buffer (100 mM HEPES, 500 mM NaCl, 10% glycerol, 10 mM imidazole, 0.5 mM TCEP, pH 8.0

supplemented with EDTA-free protease inhibitor and Benzonase® nuclease (Sigma, 2000 U); 15 mL lysis buffer/g cell pellet). Cells were lysed by sonication and the cleared supernatant was purified using 1 mL Ni-NTA resin washed sequentially with buffer (20 mM HEPES pH 7.5, 500 mM NaCl, 10% glycerol, and 0.5 mM TCEP) containing increasing concentrations of imidazole (10 mM, 25 mM and 500 mM). The recombinant enzyme was purified using PD-10 desalting column (GE Healthcare) with filtration buffer (20 mM HEPES, 300 mM NaCl, 10% glycerol, 0.5 mM TCEP, pH 7.5). Protein purity was assessed by SDS-PAGE.

### **Partial proteolysis**

GRP78 (5 µg for SDS-PAGE analysis) was incubated with 1 mM ATP, 1 mM ADP, 100 µM YUM70, 100 µM YUM70 + 1 mM ATP, 100 µM YUM70 + 1 mM ADP, 100 µM VER, 100 µM VER+1 mM ATP, 100 µM VER + 1mM ADP for 30 min at room temperature. GRP78 was digested by adding 0.1 µg trypsin (Promega, V5280) per 2 µg protein and incubated at 37 °C for 30 min. Samples were quenched by the addition of 5X loading buffer and boiling and separated on a 4-20% pre-made SDS-PAGE gel (Bio-Rad). Gels were visualized by coomassie stain.

### **Pathway analysis**

Bru-seq data sets of MIA PaCa-2 cells treated with YUM70 were filtered using the cut-off values  $> 10$  normalized counts and mean reads per kilobase per million (RPKM)  $> 0.5$ . After filter, a total of 8,949 genes were ranked based on fold change values versus DMSO control. The ranked-order gene list was analyzed using GSEA for pathway identification. GSEA was performed based on the Kolmogorov– Smirnov statistics (9). For each gene set, the ES (enrichment scores) were normalized to account for differences in gene set size. The false discovery rate (FDR) was calculated relative to the normalized enrichment score (NES) values. DAVID (Database for Annotation, Visualization, and Integrated Discovery) functional annotation analysis (10) was

performed on the list of up- and downregulated genes with a fold change  $\geq 2$  (216 upregulated and 92 downregulated). Only those terms that reported a *p*-value of  $\leq 0.05$  and count number  $\geq 6$  genes were selected for analysis.

### **Connectivity map**

Connectivity map (CMap) is a web resource that uses transcriptional expression profiles to identify relationships between other expression profiles, diseases, and therapeutics (<https://clue.io/cmap>). The changes in gene expression from a disease, gene knockdown or overexpression or treatment with a small molecule are compared for similarity to all available signatures in the database. We used the top 150 upregulated and downregulated genes as input to search for compounds and genes showing a similar signature. Compound or genes were selected based on the connectivity score  $>90.0$ .

### **Competitive binding assay**

Competition between PACMA 57 (a PDI-selective probe) and YUM70 was determined as described (11). Briefly, 0.3  $\mu\text{M}$  recombinant PDI protein was incubated with 100, 10, and 1  $\mu\text{M}$  of YUM70 for 1 h at 37 °C followed by 1 h incubation with 500nM of PACMA 57. Solutions were mixed with 5x SDS sample buffer and analyzed by SDS/PAGE. After fluorescence scanning gels were stained with coomassie blue. PACMA 31 is a PDI inhibitor (11) used as a positive control.

Competition between CMFDA (a GSTO1-selective probe) and YUM70 was determined as described (12). Briefly, 1  $\mu\text{M}$  recombinant GSTO1 protein was incubated with 100, 10, and 1  $\mu\text{M}$  of YUM70 for 1 hr at 37 °C followed by 1 hr incubation with 500nM of CMFDA. Solutions were mixed with 5x SDS sample buffer and analyzed by SDS/PAGE, and then gels were scan and stain as stated above. The reported GSTO1 inhibitor, C127 (12) was used as a positive control.

### **PDI reductase assay**

Recombinant PDI protein (0.4  $\mu\text{M}$ ) was incubated with indicated compounds at 37°C for 1 hr in sodium phosphate buffer (100 mM sodium phosphate, 2mM EDTA, and 8  $\mu\text{M}$  DTT, pH 7.0). Then the reaction mixture consisting of DTT (500  $\mu\text{M}$ ) and bovine insulin (130  $\mu\text{M}$ ) was added to the incubated PDI protein. The reduction reaction was catalyzed by PDI at room temperature, and the resulting aggregation of reduced insulin B chains was measured at 620 nm. % PDI activity was calculated from absorbance values at T= 0 to 80 min as described (11).

### **Molecular docking**

YUM70, along with an inactive analog, YUM117 were docked into the substrate binding site as well as the novolactone-binding site of GRP78 (PDB: 5E85) using GOLD (Genetic Optimization for Ligand Docking) software package, version 4.0 (Cambridge Crystallographic Data Centre, Cambridge, U.K.). NR-peptide was removed from the substrate-binding pocket of the protein as a part of the protein preparation procedure for docking. Prior to docking, 10 different conformations were generated for each ligand using OMEGA v3.0.0 (OpenEye Scientific, Santa Fe, NM), a systematic, knowledge-based conformer generator (13). Docking studies were performed using the standard default settings with 100 genetic algorithms (GA) runs on each molecule and allowing side-chain flexibility of important allosteric site residues within their rotamer library.

### **Isolation of RNA and cDNA preparation**

Cells were treated with the compounds at indicated dose and time. Total RNA was isolated from each cell line using the RNeasy Mini Kit (Qiagen, 74104) according to the manufacturer's protocol. The concentrations of the RNA preparations were determined by NanoDrop<sup>TM</sup> (Thermo Fisher Scientific). The total RNA was reversed transcribed into cDNA using 1  $\mu\text{g}$  of total RNA in the presence of random primers, dNTPs, and reverse transcriptase (cDNA Reverse Transcription Kit, 4374966, Applied Biosystem,) following the manufacturer's protocol.

**PCR:** After first-strand cDNA synthesis, 5 µl of the reaction mixture was used to prepare a 20 µl PCR mix containing Phusion® High-Fidelity DNA polymerase (New England Bio Labs, M0530S) using 2 min at 98 °C, 30 cycles at 98 °C for 20 sec, 56 °C for 30 sec, 72 °C for 20 sec, 1 min at 72 °C, 4 °C forever. PCR reactions were then subjected to electrophoresis on 1 % agarose gel. Actin was used as an internal control. Band intensity was calculated in ImageJ (NIH) software. All primer sequences are presented below.

### **RT-PCR primer information**

The specific primer pair for actin comprised a sense primer 5'TTG CCG ACA GGA TGC AGA A-3' and an anti-sense primer 5'GCC GAT CCA CAC GGA GTA CT-3'. The specific primer pair for GRP78 comprised a sense primer 5'-GCCTGTATTTCTAGACCTGCC-3' and an anti-sense primer 5'-TTCATCTTGCCAGCCAGTTG-3'. The specific primer pair for CHAC-1 comprised of a sense primer 5' CCTGAAGTACCTGAATGTGCGAGA 3' and an anti-sense primer 5' GCAGCAAGTATTCAAGGTTGTGGC 3'. The specific primer pair for DDIT3 comprised of a sense primer 5'TCTTGACCCTGCTTCTCTGG3' and an anti-sense primer 5'GCTGTGCCACTTTCCTTTCA3'.

### **siRNA**

GRP78 siRNAs (Silencer® Select siRNA, Ambion Inc, s6979, s6980) and non specific control siRNA (Silencer® Select siRNA, Ambion Inc, AM4611) were purchased from Thermo Fisher Scientific. siRNA transfection was carried out with Lipofectamine® RNAiMAX transfection reagent (Invitrogen, 13778-075) following the manufacturer's protocol.

## References

1. Cardellicchio C, Capozzi MAM, Naso F. The Betti base: the awakening of a sleeping beauty. *Tetrahedron-Asymmetry* **2010**;21:507-17
2. McLean LR, Zhang Y, Li H, Li Z, Lukasczyk U, Choi YM, *et al.* Discovery of covalent inhibitors for MIF tautomerase via cocrystal structures with phantom hits from virtual screening. *Bioorg Med Chem Lett* **2009**;19:6717-20
3. Nesvadba P. Easy large scale syntheses of 2,6-di-t-butyl-7-cyano-, 7-carboxy- and 7-methoxycarbonyl quinone methides. *Synthetic Commun* **2000**;30:2825-32
4. Tramonti.M. Advances in chemistry of Mannich bases. *Synthesis-Stuttgart* **1973**:703-75
5. Gilbert AM, Bursavich, M. G., Lombardi, S., Georgiadis, K. E., Reifenberg, E., Flannery, C. R., and Morris, E. A. . N-((8-hydroxy-5-substituted-quinolin-7-yl)(phenyl)methyl)-2-phenyloxy/amino-aceta mide inhibitors of ADAMTS-5 (Aggrecanase-2). *Bioorg Med Chem Lett* **2008**;18:6454-7
6. Kenyon V, Rai, G., Jadhav, A., Schultz, L., Armstrong, M., Jameson, J. B., 2nd, Perry, S., Joshi, N., Bougie, J. M., Leister, W., Taylor-Fishwick, D. A., Nadler, J. L., Holinstat, M., Simeonov, A., Maloney, D. J., and Holman, T. R. Discovery of potent and selective inhibitors of human platelet-type 12- lipoxygenase. *J Med Chem* **2011**;54:5485-97
7. Carmichael J, DeGraff WG, Gazdar AF, Minna JD, Mitchell JB. Evaluation of a tetrazolium-based semiautomated colorimetric assay: assessment of chemosensitivity testing. *Cancer Res* **1987**;47:936-42
8. Wisniewska M, Karlberg T, Lehtio L, Johansson I, Kotenyova T, Moche M, *et al.* Crystal structures of the ATPase domains of four human Hsp70 isoforms: HSPA1L/Hsp70-hom, HSPA2/Hsp70-2, HSPA6/Hsp70B', and HSPA5/BiP/GRP78. *PLoS One* **2010**;5:e8625

9. Subramanian A, Tamayo P, Mootha VK, Mukherjee S, Ebert BL, Gillette MA, *et al.* Gene set enrichment analysis: a knowledge-based approach for interpreting genome-wide expression profiles. *Proc Natl Acad Sci U S A* **2005**;102:15545-50
10. Huang da W, Sherman BT, Lempicki RA. Systematic and integrative analysis of large gene lists using DAVID bioinformatics resources. *Nat Protoc* **2009**;4:44-57
11. Xu S, Butkevich AN, Yamada R, Zhou Y, Debnath B, Duncan R, *et al.* Discovery of an orally active small-molecule irreversible inhibitor of protein disulfide isomerase for ovarian cancer treatment. *Proc Natl Acad Sci U S A* **2012**;109:16348-53
12. Ramkumar K, Samanta S, Kyani A, Yang S, Tamura S, Ziemke E, *et al.* Mechanistic evaluation and transcriptional signature of a glutathione S-transferase omega 1 inhibitor. *Nat Commun* **2016**;7:13084
13. Hawkins PC, Skillman AG, Warren GL, Ellingson BA, Stahl MT. Conformer generation with OMEGA: algorithm and validation using high quality structures from the Protein Databank and Cambridge Structural Database. *J Chem Inf Model* **2010**;50:572-84

**Table S1.** Cytotoxicity of YUM70 analogs in pancreatic cancer cell lines

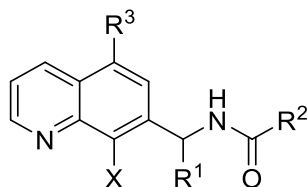

| Compds | X                | R <sup>1</sup> | R <sup>2</sup> | R <sup>3</sup> | IC <sub>50</sub> (μM) <sup>a</sup> |          |          |
|--------|------------------|----------------|----------------|----------------|------------------------------------|----------|----------|
|        |                  |                |                |                | MIA PaCa-2                         | PANC-1   | BxPC-3   |
| YUM70  | OH               |                |                | Cl             | 2.8±0.9                            | 4.5±1.1  | 9.6±0.7  |
| YUM72  | OH               |                |                | Cl             | 2.8±1.9                            | 4.9±1.2  | 8.7±1.8  |
| YUM75  | OH               |                |                | Cl             | 4.2±0.5                            | 3.7±0.2  | 6.1±1.7  |
| YUM79  | OH               |                |                | Cl             | 2.5±0.5                            | 3.0±1.6  | 2.9±0.6  |
| YUM82  | OH               |                |                | Cl             | 4.2±0.6                            | 6.4±1.7  | 5.0±2.2  |
| YUM86  | OH               |                |                | Cl             | 14.4±3.9                           | 18.2±0.3 | 13.8±0.9 |
| YUM89  | OH               |                |                | Cl             | 1.7±0.5                            | 13.1±1.9 | 8.2±0.3  |
| YUM91  | OH               |                |                | Cl             | 3.7±0.3                            | 5.8±0.2  | 13.9±2.3 |
| YUM92  | OH               |                |                | Cl             | >30.0                              | >30.0    | >30.0    |
| YUM94  | OH               |                |                | Cl             | 2.3±1.4                            | 8.1±1.8  | 9.2±1.1  |
| YUM166 | OH               |                |                | Cl             | 2.8±0.6                            | 3.0±0.6  | 8.9±4.2  |
| YUM227 | OCH <sub>3</sub> |                |                | Cl             | 3.3±0.3                            | 6.5±0.5  | 10.3±3.3 |
| YUM117 | OCH <sub>3</sub> |                |                | Cl             | >30.0                              | >30.0    | >30.0    |



Table S1. Continue ...

| Compds    | X                                                                                 | R <sup>1</sup>                                                                      | R <sup>2</sup>                                                                      | R <sup>3</sup> | IC <sub>50</sub> (μM) <sup>a</sup> |          |          |
|-----------|-----------------------------------------------------------------------------------|-------------------------------------------------------------------------------------|-------------------------------------------------------------------------------------|----------------|------------------------------------|----------|----------|
|           |                                                                                   |                                                                                     |                                                                                     |                | MIA PaCa-2                         | PANC-1   | BxPC-3   |
| YUM245    | OCH <sub>3</sub>                                                                  | 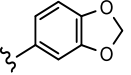   |    | Cl             | >30.0                              | >30.0    | >30.0    |
| YUM137    |  |    |    | Cl             | >30                                | >30      | >30      |
| YUM168    | OH                                                                                |    |    | Cl             | >30                                | >30      | >30      |
| YUM272    | OH                                                                                |    |    | H              | 0.8±0.9                            | 1.9±0.4  | 6.2±2.9  |
| YUM347A   | OH                                                                                |   |   | Cl             | 28.6±1.9                           | >30      | >30      |
| YUM354    | OH                                                                                |  |  | Cl             | 28±2.9                             | >30      | >30      |
| YUM401    | OH                                                                                |  |  | Cl             | 5.8±0.7                            | 13.8±0.5 | 11.6±3.1 |
| YUM402    | OH                                                                                |  |  | Cl             | 1±0.7                              | 6.7±4.5  | 21.3±3.2 |
| YUM411    | OH                                                                                |  |  | Br             | 1.3±1.1                            | 4±1.5    | 13.4±1   |
| VER155008 |                                                                                   |                                                                                     |                                                                                     |                | 14.6                               | >30.0    | >30.0    |

<sup>a</sup> IC<sub>50</sub> is defined as the compound concentration causing 50% decrease in cell growth and the values expressed as mean ± SD are from three independent experimnts.

**Table S2.** Top 20 transcriptionally upregulated genes in response to YUM70 treatment in MIA PaCa-2 cells. Nascent RNA Bru-seq was used to assess the effect of YUM70 on genome-wide transcription in two biological replicates of MIA PaCa-2 cells, data of replicate 1 is presented here.

| <b>Gene Symbol</b> | <b>Gene Name (Description)</b>                                               | <b>Fold change</b> |
|--------------------|------------------------------------------------------------------------------|--------------------|
| FAM129A            | Family with sequence similarity 129, member A                                | 23.0               |
| GDF15              | Growth differentiation factor 15                                             | 23.1               |
| UNC5B              | Unc-5 netrin receptor B                                                      | 23.9               |
| TRIB3              | Tribbles homolog 3 (Drosophila)                                              | 13.9               |
| SLC1A4             | Solute carrier family 1 (glutamate/neutral amino acid transporter), member 4 | 13.7               |
| ATF3               | Activating transcription factor 3                                            | 13.8               |
| ASNS               | Asparagine synthetase (Glutamine-Hydrolyzing)                                | 11.2               |
| SLFN5              | Schlafen family member 5                                                     | 9.7                |
| CHAC1              | ChaC, cation transport regulator homolog 1 (E. coli)                         | 9.0                |
| C6orf226           | Chromosome 6 open reading frame 226                                          | 8.0                |
| DDIT4              | DNA-damage-inducible transcript 4                                            | 7.9                |
| AC068580.4         | Uncharacterized protein                                                      | 7.2                |
| SESN2              | Sestrin 2                                                                    | 6.9                |
| BBC3               | BCL2 binding component 3                                                     | 6.5                |
| JDP2               | Jun dimerization protein 2                                                   | 6.5                |
| EIF4EBP3           | Eukaryotic translation initiation factor 4E binding protein 3                | 5.9                |
| DDIT3              | DNA-damage-inducible transcript 3                                            | 5.6                |
| PHGDH              | Phosphoglycerate dehydrogenase                                               | 5.4                |
| AKNA               | AT-hook transcription factor                                                 | 5.3                |
| UPP1               | Uridine phosphorylase 1                                                      | 5.0                |

**Table S3.** Top 20 transcriptionally downregulated genes in response to YUM70 treatment in MIA PaCa-2 cells. Nascent RNA Bru-seq was used to assess the effect of YUM70 on genome-wide transcription in two biological replicates of MIA PaCa-2 cells, data of replicate 1 is presented here.

| <b>Gene Symbol</b> | <b>Gene Name (Description)</b>                                                | <b>Fold change</b> |
|--------------------|-------------------------------------------------------------------------------|--------------------|
| AC120114.5         | Uncategorized gene                                                            | -8.6               |
| BSCL2              | BSCL2 lipid droplet biogenesis associated, seipin                             | -4.6               |
| BRINP3             | BMP/retinoic acid inducible neural specific 3                                 | -4.6               |
| HIST1H3H           | Histone cluster 1 H3 family member H                                          | -4.0               |
| TM4SF18            | Transmembrane 4 L six family member 18                                        | -3.7               |
| IPO4               | Importin 4                                                                    | -3.7               |
| HIST1H2BO          | Histone cluster 1 H2B family member O                                         | -3.7               |
| DPH6               | Diphthamine biosynthesis 6                                                    | -3.7               |
| TAS2R14            | Taste 2 receptor member 14                                                    | -3.7               |
| C1orf50            | Chromosome 1 open reading frame 50                                            | -3.5               |
| HIST1H2BL          | Histone cluster 1 H2B family member L                                         | -3.5               |
| CYB5D1             | Cytochrome B5 domain containing 1                                             | -3.2               |
| HIST2H2AB          | Histone cluster 2 H2A family member B                                         | -3.2               |
| TCTEX1D2           | Tctex1 domain containing 2                                                    | -3.2               |
| ATP23              | ATP23 metallopeptidase and ATP synthase assembly factor homolog               | -3.2               |
| HIST1H2AJ          | Histone cluster 1 H2A family member J                                         | -3.2               |
| SHOX2              | Short stature homeobox 2                                                      | -3.2               |
| HIST1H2BF          | Histone cluster 1 H2B fmember F                                               | -3.2               |
| BORCS7             | BLOC-1 related complex subunit 7                                              | -3.0               |
| TFAP2A             | Transcription factor AP-2 alpha (activating enhancer binding protein 2 alpha) | -2.8               |

**Table S4.** Top 24 up-regulated gene set in GSEA of Hallmark pathways. Nascent RNA Bru-seq was used to assess the effect of YUM70 on genome-wide transcription in two biological replicates of MIA PaCa-2 cells, data of replicate 1 is presented here.

| Name                                       | SIZE       | NES        | FDR<br>q-val | NOM<br>p-val |
|--------------------------------------------|------------|------------|--------------|--------------|
| HALLMARK_TNFA_SIGNALING_VIA_NFKB           | 163        | 2.9        | 0.00         | 0.000        |
| HALLMARK_HYPOXIA                           | 155        | 2.7        | 0.00         | 0.000        |
| HALLMARK_P53_PATHWAY                       | 176        | 2.6        | 0.00         | 0.000        |
| <b>HALLMARK_UNFOLDED_PROTEIN_RESPONSE</b>  | <b>106</b> | <b>2.5</b> | <b>0.00</b>  | <b>0.000</b> |
| HALLMARK_INTERFERON_GAMMA_RESPONSE         | 139        | 2.2        | 0.00         | 0.000        |
| HALLMARK_APOPTOSIS                         | 132        | 2.2        | 0.00         | 0.000        |
| HALLMARK_INFLAMMATORY_RESPONSE             | 107        | 2.2        | 0.00         | 0.000        |
| HALLMARK_INTERFERON_ALPHA_RESPONSE         | 76         | 2.1        | 0.00         | 0.000        |
| HALLMARK_IL2_STAT5_SIGNALING               | 141        | 2.1        | 0.00         | 0.000        |
| HALLMARK_MTORC1_SIGNALING                  | 191        | 2.1        | 0.00         | 0.000        |
| HALLMARK_CHOLESTEROL_HOMEOSTASIS           | 66         | 2.0        | 0.00         | 0.000        |
| HALLMARK_MYOGENESIS                        | 124        | 1.9        | 0.00         | 0.000        |
| HALLMARK_COAGULATION                       | 74         | 1.8        | 0.00         | 0.000        |
| HALLMARK_EPITHELIAL_MESENCHYMAL_TRANSITION | 148        | 1.8        | 0.00         | 0.000        |
| HALLMARK_XENOBIOTIC_METABOLISM             | 141        | 1.7        | 0.00         | 0.000        |
| HALLMARK_COMPLEMENT                        | 133        | 1.7        | 0.01         | 0.000        |
| HALLMARK_GLYCOLYSIS                        | 178        | 1.6        | 0.01         | 0.002        |
| HALLMARK_PI3K_AKT_MTOR_SIGNALING           | 91         | 1.6        | 0.01         | 0.002        |
| HALLMARK_ESTROGEN_RESPONSE_EARLY           | 164        | 1.6        | 0.01         | 0.000        |
| HALLMARK_TGF_BETA_SIGNALING                | 50         | 1.5        | 0.01         | 0.009        |
| HALLMARK_IL6_JAK_STAT3_SIGNALING           | 52         | 1.5        | 0.02         | 0.025        |
| HALLMARK_ALLOGRAFT_REJECTION               | 100        | 1.5        | 0.03         | 0.010        |
| HALLMARK_KRAS_SIGNALING_UP                 | 117        | 1.4        | 0.03         | 0.014        |
| HALLMARK_ESTROGEN_RESPONSE_LATE            | 155        | 1.4        | 0.04         | 0.009        |

**Table S5.** Top 24 up-regulated gene set in GSEA of Gene Ontology. Nascent RNA Bru-seq was used to assess the effect of YUM70 on genome-wide transcription in two biological replicates of MIA PaCa-2 cells, data of replicate 1 is presented here.

| Name                                                                                          | SIZE | NES | FDR<br>q-val | NOM<br>p-val |
|-----------------------------------------------------------------------------------------------|------|-----|--------------|--------------|
| <b>GO_INTRINSIC_APOPTOTIC_SIGNALING_PATHWAY_IN_RESPONSE_TO_ENDOPLASMIC_RETICULUM_STRESS</b>   | 29   | 2.6 | 0.00         | 0.000        |
| GO_CELLULAR_RESPONSE_TO_TOPOLOGICALLY_INCORRECT_PROTEIN                                       | 102  | 2.5 | 0.00         | 0.000        |
| <b>GO_RESPONSE_TO_ENDOPLASMIC_RETICULUM_STRESS</b>                                            | 203  | 2.5 | 0.00         | 0.000        |
| GO_POSITIVE_REGULATION_OF_TRANSCRIPTION_FROM_RNA_POLYMERASE_II_PROMOTER_IN_RESPONSE_TO_STRESS | 20   | 2.4 | 0.00         | 0.000        |
| GO_REGULATION_OF_DNA_TEMPLATED_TRANSCRIPTION_IN_RESPONSE_TO_STRESS                            | 58   | 2.4 | 0.00         | 0.000        |
| GO_L_AMINO_ACID_TRANSMEMBRANE_TRANSPORTER_ACTIVITY                                            | 34   | 2.3 | 0.00         | 0.000        |
| GO_CELLULAR_RESPONSE_TO_GLUCOSE_STARVATION                                                    | 29   | 2.3 | 0.00         | 0.000        |
| GO_NEUTRAL_AMINO_ACID_TRANSPORT                                                               | 20   | 2.3 | 0.00         | 0.000        |
| GO_L_AMINO_ACID_TRANSPORT                                                                     | 38   | 2.3 | 0.00         | 0.000        |
| GO_REGULATION_OF_ENDOPLASMIC_RETICULUM_STRESS_INDUCED_INTRINSIC_APOPTOTIC_SIGNALING_PATHWAY   | 25   | 2.3 | 0.00         | 0.000        |
| GO_RESPONSE_TO_STARVATION                                                                     | 117  | 2.3 | 0.00         | 0.000        |
| GO_INTRINSIC_APOPTOTIC_SIGNALING_PATHWAY                                                      | 133  | 2.3 | 0.00         | 0.000        |
| GO_RESPONSE_TO_TOPOLOGICALLY_INCORRECT_PROTEIN                                                | 136  | 2.2 | 0.00         | 0.000        |
| GO_CELLULAR_RESPONSE_TO_STARVATION                                                            | 94   | 2.2 | 0.00         | 0.000        |
| GO_RESPONSE_TO_TYPE_I_INTERFERON                                                              | 46   | 2.2 | 0.00         | 0.001        |
| GO_ER_NUCLEUS_SIGNALING_PATHWAY                                                               | 30   | 2.2 | 0.00         | 0.001        |
| GO_CELLULAR_RESPONSE_TO_EXTRACELLULAR_STIMULUS                                                | 141  | 2.2 | 0.00         | 0.001        |
| GO_AUTOPHAGOSOME_MEMBRANE                                                                     | 22   | 2.2 | 0.00         | 0.001        |
| GO_IRE1_MEDIATED_UNFOLDED_PROTEIN_RESPONSE                                                    | 52   | 2.2 | 0.00         | 0.002        |
| GO_SERINE_FAMILY_AMINO_ACID_METABOLIC_PROCESS                                                 | 31   | 2.1 | 0.00         | 0.002        |
| GO_CELLULAR_RESPONSE_TO_EXTERNAL_STIMULUS                                                     | 190  | 2.1 | 0.00         | 0.002        |
| GO_CELLULAR_RESPONSE_TO_OXYGEN_LEVELS                                                         | 107  | 2.1 | 0.00         | 0.002        |
| GO_INTERFERON_GAMMA_MEDIATED_SIGNALING_PATHWAY                                                | 41   | 2.1 | 0.00         | 0.002        |
| GO_CELLULAR_RESPONSE_TO_INTERFERON_GAMMA                                                      | 57   | 2.1 | 0.00         | 0.003        |

**Table S6.** Top 24 upregulated transcription factors in response to YUM70 treatment in MIA PaCa-2 cells. Nascent RNA Bru-seq was used to assess the effect of YUM70 on genome-wide transcription in two biological replicates of MIA PaCa-2 cells, data of replicate 1 is presented here.

| <b>Name</b>          | <b>SIZE</b> | <b>NES</b> | <b>FDR q-val</b> | <b>NOM p-val</b> |
|----------------------|-------------|------------|------------------|------------------|
| <b>ATF3_Q6</b>       | 176         | 2.1        | 0.00             | 0.000            |
| <b>CHOP_01</b>       | 171         | 2.0        | 0.00             | 0.002            |
| CREB_Q2              | 210         | 1.9        | 0.00             | 0.004            |
| TGASTMAGC_NFE2_01    | 135         | 1.8        | 0.00             | 0.011            |
| BACH2_01             | 200         | 1.8        | 0.00             | 0.009            |
| TGAYRTCA_ATF3_Q6     | 357         | 1.8        | 0.00             | 0.020            |
| ATF1_Q6              | 160         | 1.8        | 0.00             | 0.020            |
| AP2ALPHA_01          | 185         | 1.7        | 0.00             | 0.020            |
| CREBP1_01            | 136         | 1.7        | 0.00             | 0.019            |
| ATF_01               | 194         | 1.7        | 0.00             | 0.019            |
| CREB_Q4              | 213         | 1.7        | 0.00             | 0.020            |
| NFE2_01              | 188         | 1.7        | 0.00             | 0.020            |
| HEB_Q6               | 180         | 1.7        | 0.00             | 0.021            |
| SRF_01               | 34          | 1.7        | 0.01             | 0.022            |
| CREBP1_Q2            | 191         | 1.7        | 0.00             | 0.023            |
| GGGNNTTCC_NFKB_Q6_01 | 95          | 1.7        | 0.00             | 0.023            |
| CREB_Q4_01           | 168         | 1.7        | 0.00             | 0.021            |
| AP1_Q4_01            | 190         | 1.7        | 0.00             | 0.021            |
| AP2GAMMA_01          | 190         | 1.7        | 0.00             | 0.021            |
| BACH1_01             | 192         | 1.7        | 0.00             | 0.021            |
| HNF3B_01             | 125         | 1.6        | 0.00             | 0.024            |
| AP4_01               | 184         | 1.6        | 0.00             | 0.027            |
| ATF6_01              | 91          | 1.6        | 0.00             | 0.027            |
| TCANNTGAY_SREBP1_01  | 362         | 1.6        | 0.00             | 0.026            |

**Table S7.** Top 24 up-regulated micro RNAs in response to YUM70 treatment in MIA PaCa-2 cells. Nascent RNA Bru-seq was used to assess the effect of YUM70 on genome-wide transcription in two biological replicates of MIA PaCa-2 cells, data of replicate 1 is presented here.

| <b>Symbol</b> | <b>Related pathways/ disease associated with</b>                                                                                          | <b>Fold change</b> |
|---------------|-------------------------------------------------------------------------------------------------------------------------------------------|--------------------|
| MIR3191       | Activation of BH3-only proteins and Apoptosis Modulation and Signaling.                                                                   | 31.2               |
| MIR24-2       | Hepatocellular Carcinoma and Thyroid Cancer, Nonmedullary, 1.                                                                             | 25.9               |
| MIR6734       | alpha-linolenic acid (ALA) metabolism and Regulation of lipid metabolism by Peroxisome proliferator-activated receptor alpha (PPARalpha). | 6.2                |
| MIR589        | miRNA targets in ECM and membrane receptors.                                                                                              | 5.2                |
| MIR621        | Hyperornithinemia-Hyperammonemia-Homocitrullinuria Syndrome.                                                                              | 4.5                |
| MIR643        | Unknown                                                                                                                                   | 4.1                |
| MIR4263       | Unknown                                                                                                                                   | 3                  |
| MIR944        | Unknown                                                                                                                                   | 2.9                |
| MIR193A       | Oral Squamous Cell Carcinoma and Melanoma.                                                                                                | 2.9                |
| MIR1236       | Formation of HIV-1 elongation complex containing HIV-1 Tat and Gene Expression.                                                           | 2.8                |
| MIR6739       | Unknown                                                                                                                                   | 2.6                |
| MIR6850       | Viral mRNA Translation and Influenza Viral RNA Transcription and Replication.                                                             | 2.6                |
| MIR4258       | Unknown                                                                                                                                   | 2.4                |
| MIR570        | Unknown                                                                                                                                   | 2.4                |
| MIR616        | Unknown                                                                                                                                   | 2.4                |
| MIR6515       | Unknown                                                                                                                                   | 2.3                |
| MIR1273C      | Unknown                                                                                                                                   | 2.2                |
| MIR1289-1     | Unknown                                                                                                                                   | 2                  |
| MIR6783       | Unknown                                                                                                                                   | 1.9                |
| MIR7111       | Unknown                                                                                                                                   | 1.8                |
| MIR423        | Mesothelioma, Malignant and Muscular Dystrophy, Duchenne Type. Among its related pathways are MicroRNAs in cancer.                        | 1.7                |
| MIR3609       | Unknown                                                                                                                                   | 1.5                |
| MIR6797       | Diamond-Blackfan Anemia 1 and Diamond-Blackfan Anemia.                                                                                    | 1.4                |
| MIR5047       | mRNA Splicing - Major Pathway                                                                                                             | 1.2                |

**Table S8.** Top 24 down-regulated micro RNAs in response to YUM70 treatment in MIA PaCa-2 cells. Nascent RNA Bru-seq was used to assess the effect of YUM70 on genome-wide transcription in two biological replicates of MIA PaCa-2 cells, data of replicate 1 is presented here.

| Symbol        | Related pathways/ disease associated with                                                                            | Log 2Fold change |
|---------------|----------------------------------------------------------------------------------------------------------------------|------------------|
| <b>MIR30A</b> | <b>MicroRNAs in cancer and Parkinsons Disease Pathway/ Leiomyoma, Uterine and Nonalcoholic Fatty Liver Disease.</b>  | <b>-7.0</b>      |
| MIR3942       | Unknown                                                                                                              | -5.3             |
| MIR3657       | Unknown                                                                                                              | -3.2             |
| MIR576        | Unknown                                                                                                              | -3.1             |
| MIR3192       | Unknown                                                                                                              | -2.1             |
| MIR15B        | cardiomyocyte hypertrophy and miRNAs involved in DNA damage response/ Glioma and Gastric Cancer                      | -1.9             |
| MIR6874       | Unknown                                                                                                              | -1.9             |
| MIR378J       | Unknown                                                                                                              | -1.8             |
| MIR641        | Unknown                                                                                                              | -1.8             |
| MIR4755       | Unknown                                                                                                              | -1.5             |
| MIR454        | Colorectal Cancer.                                                                                                   | -1.4             |
| MIR3137       | Unknown                                                                                                              | -1.4             |
| MIR4753       | Unknown                                                                                                              | -1.3             |
| MIR6728       | Unknown                                                                                                              | -0.9             |
| MIRLET7D      | miRNAs involved in DNA damage response and Metastatic brain tumor/ Acute Promyelocytic Leukemia and Ovarian Cancer.  | -0.9             |
| MIRLET7F1     | miRNAs involved in DNA damage response and Metastatic brain tumor/ Pituitary Adenoma and Pancreatic Cancer.          | -0.9             |
| MIR6832       | Unknown                                                                                                              | -0.9             |
| MIR6807       | Familial Colorectal Cancer.                                                                                          | -0.7             |
| MIR640        | Unknown                                                                                                              | -0.7             |
| MIR25         | miRNAs involved in DNA damage response and MicroRNAs in cancer/ Gastric Cancer and Brain Cancer.                     | -0.7             |
| MIR590        | Unknown                                                                                                              | -0.6             |
| MIR1304       | Activated PKN1 stimulates transcription of AR (androgen receptor) regulated genes KLK2 and KLK3 and Gene Expression. | -0.5             |
| MIR3153       | Unknown                                                                                                              | -0.4             |
| MIR3064       | mRNA Splicing - Major Pathway and Circadian rythm related genes.                                                     | -0.4             |



**Table S9.** Top 24 up-regulated LINC RNAs in response to YUM70 treatment in MIA PaCa-2 cells. Nascent RNA Bru-seq was used to assess the effect of YUM70 on genome-wide transcription in two biological replicates of MIA PaCa-2 cells, data of replicate 1 is presented here.

| <b>Symbol</b> | <b>Related pathways/ disease associated with</b>                            | <b>Fold change</b> |
|---------------|-----------------------------------------------------------------------------|--------------------|
| LINC01629     | Unknown                                                                     | 7.6                |
| C20orf203     | Unknown                                                                     | 7                  |
| AL138895.1    | Unknown                                                                     | 5.7                |
| AC006504.1    | Unknown                                                                     | 3                  |
| AC112721.2    | Unknown                                                                     | 2.9                |
| AC112721.1    | Unknown                                                                     | 2.9                |
| AL357153.2    | Unknown                                                                     | 2.5                |
| AL160408.1    | Unknown                                                                     | 2.4                |
| LINC00662     | Unknown                                                                     | 2.3                |
| LUCAT1        | Clear Cell Renal Cell Carcinoma and Squamous Cell Carcinoma, Head And Neck. | 2.3                |
| CASC21        | Unknown                                                                     | 2.1                |
| AL034417.2    | Unknown                                                                     | 2                  |
| SRP14-AS1     | Unknown                                                                     | 2                  |
| LINC01089     | Gemistocytic Astrocytoma and Astrocytoma.                                   | 2                  |
| AC016831.5    | Unknown                                                                     | 1.8                |
| LINC01006     | Unknown                                                                     | 1.8                |
| LINC00941     | Lung Cancer Susceptibility 3 and Gastric Cancer                             | 1.8                |
| AL359710.1    | Unknown                                                                     | 1.8                |
| AC087762.1    | Unknown                                                                     | 1.8                |
| LINC02100     | Unknown                                                                     | 1.8                |
| LINC01301     | Unknown                                                                     | 1.8                |
| AC016831.1    | Unknown                                                                     | 1.7                |
| GMDS-AS1      | Unknown                                                                     | 1.7                |
| MIR22HG       | Unknown                                                                     | 1.7                |

**Table S10.** Top 24 down-regulated LINC RNAs in response to YUM70 treatment in MIA PaCa-2 cells. Nascent RNA Bru-seq was used to assess the effect of YUM70 on genome-wide transcription in two biological replicates of MIA PaCa-2 cells, data of replicate 1 is presented here.

| <b>Symbol</b> | <b>Related pathways/ disease associated with</b> | <b>Log 2 Fold change</b> |
|---------------|--------------------------------------------------|--------------------------|
| AL139383.1    |                                                  | -1.7                     |
| LINC02101     |                                                  | -1.6                     |
| AC003984.1    |                                                  | -1.5                     |
| DPH6-AS1      |                                                  | -1.4                     |
| AC124657.1    |                                                  | -1.4                     |
| AL136164.2    |                                                  | -1.4                     |
| AC067956.1    |                                                  | -1.3                     |
| AC021231.1    |                                                  | -1.2                     |
| AC012625.1    |                                                  | -1.1                     |
| LINC00473     | Mucoepidermoid Carcinoma and Wilms Tumor 1.      | -1.1                     |
| AC010983.1    |                                                  | -1.1                     |
| AL031599.1    |                                                  | -1                       |
| AC103746.1    |                                                  | -1                       |
| LINC00376     |                                                  | -0.9                     |
| AL356124.1    |                                                  | -0.9                     |
| AC073529.1    |                                                  | -0.8                     |
| AL161716.1    |                                                  | -0.8                     |
| AC104823.1    |                                                  | -0.8                     |
| MIR137HG      |                                                  | -0.8                     |
| AC087477.2    |                                                  | -0.8                     |
| AL359313.1    |                                                  | -0.7                     |
| AP005230.1    |                                                  | -0.7                     |
| AC010235.1    |                                                  | -0.7                     |
| AC048341.2    |                                                  | -0.6                     |

**Table S11.** Top 29 enriched functions from the upregulated genes in response to YUM70 treatment in MIA PaCa-2 using STRING protein-protein interaction network. Nascent RNA Bru-seq was used to assess the effect of YUM70 on genome-wide transcription in two biological replicates of MIA PaCa-2 cells, data of replicate 1 is presented here.

| GO term           | Description                                                                                                             | Genes mapped | Enrichment Scores | FDR q-val    |
|-------------------|-------------------------------------------------------------------------------------------------------------------------|--------------|-------------------|--------------|
| GO:0034436        | glycoprotein transport                                                                                                  | 3            | 3.44              | 0.006        |
| GO:1901329        | regulation of odontoblast differentiation                                                                               | 3            | 3.39              | 0.007        |
| <b>GO:0036499</b> | <b>PERK-mediated unfolded protein response</b>                                                                          | <b>10</b>    | <b>2.51</b>       | <b>0.000</b> |
| <b>GO:1990440</b> | <b>positive regulation of transcription from RNA polymerase II promoter in response to endoplasmic reticulum stress</b> | <b>12</b>    | <b>2.51</b>       | <b>0.000</b> |
| GO:0006564        | L-serine biosynthetic process                                                                                           | 7            | 2.34              | 0.001        |
| GO:0015825        | L-serine transport                                                                                                      | 7            | 2.11              | 0.002        |
| <b>GO:0036500</b> | <b>ATF6-mediated unfolded protein response</b>                                                                          | <b>9</b>     | <b>1.96</b>       | <b>0.000</b> |
| GO:0032329        | serine transport                                                                                                        | 8            | 1.90              | 0.002        |
| <b>GO:0036003</b> | <b>positive regulation of transcription from RNA polymerase II promoter in response to stress</b>                       | <b>24</b>    | <b>1.88</b>       | <b>0.001</b> |
| GO:0009070        | serine family amino acid biosynthetic process                                                                           | 15           | 1.76              | 0.000        |
| GO:0006563        | L-serine metabolic process                                                                                              | 10           | 1.70              | 0.001        |
| <b>GO:0070059</b> | <b>intrinsic apoptotic signaling pathway in response to endoplasmic reticulum stress</b>                                | <b>30</b>    | <b>1.53</b>       | <b>0.001</b> |
| GO:0015804        | neutral amino acid transport                                                                                            | 24           | 1.48              | 0.000        |
| <b>GO:1902236</b> | <b>negative regulation of endoplasmic reticulum stress-induced intrinsic apoptotic signaling pathway</b>                | <b>16</b>    | <b>1.36</b>       | <b>0.000</b> |
| <b>GO:1902235</b> | <b>regulation of endoplasmic reticulum stress-induced intrinsic apoptotic signaling pathway</b>                         | <b>29</b>    | <b>1.30</b>       | <b>0.001</b> |
| GO:0031065        | positive regulation of histone deacetylation                                                                            | 17           | 1.04              | 0.004        |
| <b>GO:1905898</b> | <b>positive regulation of response to endoplasmic reticulum stress</b>                                                  | <b>35</b>    | <b>0.92</b>       | <b>0.009</b> |
| GO:1902475        | L-alpha-amino acid transmembrane transport                                                                              | 41           | 0.90              | 0.001        |
| GO:0015807        | L-amino acid transport                                                                                                  | 41           | 0.90              | 0.001        |
| GO:0035794        | positive regulation of mitochondrial membrane permeability                                                              | 20           | 0.89              | 0.008        |
| GO:1905710        | positive regulation of membrane permeability                                                                            | 20           | 0.89              | 0.008        |
| GO:0031063        | regulation of histone deacetylation                                                                                     | 25           | 0.86              | 0.006        |
| GO:0002931        | response to ischemia                                                                                                    | 27           | 0.79              | 0.005        |
| <b>GO:1905897</b> | <b>regulation of response to endoplasmic reticulum stress</b>                                                           | <b>74</b>    | <b>0.78</b>       | <b>0.000</b> |
| <b>GO:0034620</b> | <b>cellular response to unfolded protein</b>                                                                            | <b>103</b>   | <b>0.77</b>       | <b>0.001</b> |
| GO:0060333        | interferon-gamma-mediated signaling pathway                                                                             | 41           | 0.77              | 0.002        |
| <b>GO:0030968</b> | <b>endoplasmic reticulum unfolded protein response</b>                                                                  | <b>91</b>    | <b>0.77</b>       | <b>0.002</b> |
| <b>GO:0036498</b> | <b>IRE1-mediated unfolded protein response</b>                                                                          | <b>49</b>    | <b>0.75</b>       | <b>0.010</b> |
| GO:0042772        | DNA damage response, signal transduction resulting in transcription                                                     | 17           | 0.72              | 0.008        |

**Table S12.** Top 14 enriched cellular component from the up-regulated genes upon YUM70 treatment in MIA PaCa-2 using STRING protein-protein interaction network. Nascent RNA Bru-seq was used to assess the effect of YUM70 on genome-wide transcription in two biological replicates of MIA PaCa-2 cells, data of replicate 1 is presented here.

| GO term    | Description                                                                 | Genes mapped | Enrichment Scores | FDR q-val |
|------------|-----------------------------------------------------------------------------|--------------|-------------------|-----------|
| GO:0035976 | <b>transcription factor AP-1 complex</b>                                    | 5            | 2.19              | 0.004     |
| GO:0097413 | Lewy body                                                                   | 7            | 1.85              | 0.003     |
| GO:0034663 | <b>endoplasmic reticulum chaperone complex</b>                              | 9            | 1.50              | 0.005     |
| GO:0098553 | <b>luminal side of endoplasmic reticulum membrane</b>                       | 14           | 0.76              | 0.010     |
| GO:0071556 | <b>integral component of luminal side of endoplasmic reticulum membrane</b> | 14           | 0.76              | 0.010     |
| GO:0005884 | actin filament                                                              | 53           | 0.49              | 0.000     |
| GO:0031225 | anchored component of membrane                                              | 64           | 0.35              | 0.009     |
| GO:0030670 | phagocytic vesicle membrane                                                 | 62           | 0.35              | 0.004     |
| GO:0031902 | late endosome membrane                                                      | 109          | 0.31              | 0.000     |
| GO:0043202 | lysosomal lumen                                                             | 65           | 0.29              | 0.000     |
| GO:0005770 | late endosome                                                               | 199          | 0.26              | 0.004     |
| GO:0005775 | vacuolar lumen                                                              | 117          | 0.25              | 0.000     |
| GO:0031012 | extracellular matrix                                                        | 163          | 0.21              | 0.003     |
| GO:0030667 | secretory granule membrane                                                  | 200          | 0.20              | 0.008     |

**Table S13.** Top 21 enriched reactome pathways from the up-regulated genes upon YUM70 treatment in MIA PaCa-2 using STRING protein-protein interaction network. Nascent RNA Bru-seq was used to assess the effect of YUM70 on genome-wide transcription in two biological replicates of MIA PaCa-2 cells, data of replicate 1 is presented here.

| Pathways    | Description                                                              | Genes mapped | Enrichment Scores | FDR q-val |
|-------------|--------------------------------------------------------------------------|--------------|-------------------|-----------|
| HSA-977347  | Serine biosynthesis                                                      | 8            | 2.04              | 0.000     |
| HSA-381183  | ATF6 (ATF6-alpha) activates chaperone genes                              | 9            | 1.41              | 0.001     |
| HSA-381033  | ATF6 (ATF6-alpha) activates chaperones                                   | 11           | 0.99              | 0.008     |
| HSA-381042  | <b>PERK regulates gene expression</b>                                    | 26           | 0.97              | 0.001     |
| HSA-352230  | Amino acid transport across the plasma membrane                          | 22           | 0.94              | 0.002     |
| HSA-380994  | <b>ATF4 activates genes</b>                                              | 23           | 0.93              | 0.002     |
| HSA-379716  | Cytosolic tRNA aminoacylation                                            | 24           | 0.83              | 0.004     |
| HSA-4755510 | SUMOylation of immune response proteins                                  | 10           | 0.82              | 0.005     |
| HSA-381070  | IRE1alpha activates chaperones                                           | 53           | 0.67              | 0.001     |
| HSA-381119  | Unfolded Protein Response (UPR)                                          | 88           | 0.65              | 0.001     |
| HSA-909733  | Interferon alpha/beta signaling                                          | 45           | 0.62              | 0.001     |
| HSA-877300  | Interferon gamma signaling                                               | 52           | 0.61              | 0.001     |
| HSA-381038  | XBP1(S) activates chaperone genes                                        | 51           | 0.57              | 0.002     |
| HSA-425393  | Transport of inorganic cations/anions and amino acids/oligopeptides      | 66           | 0.52              | 0.005     |
| HSA-2024096 | HS-GAG degradation                                                       | 20           | 0.46              | 0.003     |
| HSA-6785807 | Interleukin-4 and Interleukin-13 signaling                               | 59           | 0.43              | 0.003     |
| HSA-198933  | Immunoregulatory interactions between a Lymphoid and a non-Lymphoid cell | 38           | 0.40              | 0.004     |
| HSA-6794361 | Neurexins and neuroligins                                                | 44           | 0.35              | 0.009     |
| HSA-400253  | Circadian Clock                                                          | 63           | 0.30              | 0.004     |
| HSA-1474244 | Extracellular matrix organization                                        | 186          | 0.25              | 0.000     |
| HSA-1638091 | Heparan sulfate/heparin (HS-GAG) metabolism                              | 41           | 0.25              | 0.002     |

**Table S14.** Top 4 enriched INTERPRO Protein Domains and Features from the up-regulated genes in response to YUM70 treatment in MIA PaCa-2 using STRING protein-protein interaction network. Nascent RNA Bru-seq was used to assess the effect of YUM70 on genome-wide transcription in two biological replicates of MIA PaCa-2 cells, data of replicate 1 is presented here.

| <b>Domain</b> | <b>Description</b>                   | <b>Genes mapped</b> | <b>Enrichment Scores</b> | <b>FDR q-val</b> |
|---------------|--------------------------------------|---------------------|--------------------------|------------------|
| IPR000837     | <b>AP-1 transcription factor</b>     | 8                   | 2.22                     | 0.003            |
| IPR004827     | Basic-leucine zipper domain          | 48                  | 1.30                     | 0.000            |
| IPR020846     | Major facilitator superfamily domain | 67                  | 0.38                     | 0.009            |
| IPR007110     | Immunoglobulin-like domain           | 198                 | 0.13                     | 0.007            |

**Table S15.** Connectivity map analysis of YUM70. Top bioactive compound or compound perturbagens (CP), Gene knock-down perturbagens (KD) with positive connectivity score are listed.

| <b>Type</b> | <b>Name</b>  | <b>Description</b>                  | <b>CS</b> |
|-------------|--------------|-------------------------------------|-----------|
| CP          | Tunicamycin  | GLCNAC phosphotransferase inhibitor | 99.93     |
| CP          | Thapsigargin | ATPase inhibitor                    | 99.82     |
| CP          | MG-132       | Proteasome inhibitor                | 99.26     |
| CP          | Irinotecan   | Topoisomerase inhibitor             | 99.40     |
| CP          | SCH-79797    | Proteasome inhibitor                | 99.29     |
| CP          | MLN-2238     | Proteasome inhibitor                | 98.41     |
| CP          | z-leu3-VS    | Proteasome inhibitor                | 98.32     |
| CP          | JNJ-26854165 | HDAC inhibitor                      | 98.27     |
| CP          | THM-I-94     | HDAC inhibitor                      | 97.60     |
| CP          | Panobinostat | HDAC inhibitor                      | 97.53     |
| CP          | Topotecan    | Topoisomerase inhibitor             | 93.34     |
| CP          | Vorinostat   | HDAC inhibitor                      | 92.23     |
| KD          | VCP          | ATPases / AAA-type                  | 99.95     |
| KD          | HSPA5        | Heat shock proteins / HSP70         | 99.53     |

CS is the connectivity score (from -100 to 100). A positive higher score means more positive connection between the bioactive compound and YUM70.

**Table S16.** Top 9 down-regulated gene set in GSEA of Hallmark pathways. Nascent RNA Bru-seq was used to assess the effect of YUM70 on genome-wide transcription in two biological replicates of MIA PaCa-2 cells, data of replicate 1 is presented here.

| <b>Name</b>                        | <b>SIZE</b> | <b>NES</b> | <b>FDR<br/>q-val</b> | <b>NOM<br/>p-val</b> |
|------------------------------------|-------------|------------|----------------------|----------------------|
| HALLMARK_E2F_TARGETS               | 195         | -2.9       | 0.00                 | 0.000                |
| HALLMARK_G2M_CHECKPOINT            | 193         | -2.9       | 0.00                 | 0.000                |
| HALLMARK_MYC_TARGETS_V1            | 196         | -2.7       | 0.00                 | 0.000                |
| HALLMARK_MITOTIC_SPINDLE           | 195         | -2.1       | 0.00                 | 0.000                |
| HALLMARK_SPERMATOGENESIS           | 78          | -2.0       | 0.00                 | 0.000                |
| HALLMARK_MYC_TARGETS_V2            | 58          | -1.9       | 0.00                 | 0.000                |
| HALLMARK_OXIDATIVE_PHOSPHORYLATION | 193         | -1.7       | 0.00                 | 0.003                |
| HALLMARK_PEROXISOME                | 86          | -1.4       | 0.05                 | 0.066                |
| HALLMARK_FATTY_ACID_METABOLISM     | 127         | -1.3       | 0.06                 | 0.120                |



**Table S17.** Top 24 down-regulated gene set in GSEA of gene ontology (GO). Nascent RNA Br-  
seq was used to assess the effect of YUM70 on genome-wide transcription in two biological  
replicates of MIA PaCa-2 cells, data of replicate 1 is presented here.

| Name                                                            | SIZE | NES  | FDR<br>q-val | NOM<br>p-val |
|-----------------------------------------------------------------|------|------|--------------|--------------|
| GO_SISTER_CHROMATID_SEGREGATION                                 | 154  | -2.8 | 0.00         | 0.000        |
| GO_NUCLEAR_CHROMOSOME_SEGREGATION                               | 186  | -2.7 | 0.00         | 0.000        |
| GO_CHROMOSOME_SEGREGATION                                       | 228  | -2.7 | 0.00         | 0.000        |
| GO_MITOTIC_SISTER_CHROMATID_SEGREGATION                         | 83   | -2.6 | 0.00         | 0.000        |
| GO_MITOTIC_NUCLEAR_DIVISION                                     | 319  | -2.6 | 0.00         | 0.000        |
| GO_CONDENSED_CHROMOSOME                                         | 162  | -2.6 | 0.00         | 0.000        |
| GO_CHROMOSOMAL_REGION                                           | 284  | -2.6 | 0.00         | 0.000        |
| GO_CHROMOSOME_CENTROMERIC_REGION                                | 154  | -2.6 | 0.00         | 0.000        |
| GO_SISTER_CHROMATID_COHESION                                    | 95   | -2.6 | 0.00         | 0.000        |
| GO_CONDENSED_CHROMOSOME_CENTROMERIC_REGION                      | 85   | -2.6 | 0.00         | 0.000        |
| GO_SPINDLE                                                      | 256  | -2.5 | 0.00         | 0.000        |
| GO_MITOTIC_SPINDLE_ORGANIZATION                                 | 58   | -2.5 | 0.00         | 0.000        |
| GO_ORGANELLE_FISSION                                            | 403  | -2.5 | 0.00         | 0.000        |
| GO_KINETOCHORE                                                  | 105  | -2.5 | 0.00         | 0.000        |
| GO_SPINDLE_POLE                                                 | 108  | -2.5 | 0.00         | 0.000        |
| GO_DNA_PACKAGING                                                | 141  | -2.5 | 0.00         | 0.000        |
| GO_CENTROMERE_COMPLEX_ASSEMBLY                                  | 38   | -2.4 | 0.00         | 0.000        |
| GO_CONDENSED_NUCLEAR_CHROMOSOME                                 | 65   | -2.4 | 0.00         | 0.000        |
| GO_REGULATION_OF_MICROTUBULE_POLYMERIZATION_OR_DEPOLYMERIZATION | 147  | -2.4 | 0.00         | 0.000        |
| GO_REGULATION_OF_CHROMOSOME_SEGREGATION                         | 74   | -2.4 | 0.00         | 0.000        |
| GO_RNA_SPLICING_VIA_TRANSESTERIFICATION_REACTIONS               | 248  | -2.4 | 0.00         | 0.000        |
| GO_RIBONUCLEOPROTEIN_COMPLEX_LOCALIZATION                       | 105  | -2.3 | 0.00         | 0.000        |
| GO_NEGATIVE_REGULATION_OF_PROTEIN_COMPLEX_DISASSEMBLY           | 135  | -2.3 | 0.00         | 0.000        |
| GO_DNA_CONFORMATION_CHANGE                                      | 217  | -2.3 | 0.00         | 0.000        |

**Table S18.** Top 24 down-regulated transcription factors upon YUM70 treatment in MIA PaCa-2 cells. Nascent RNA Bru-seq was used to assess the effect of YUM70 on genome-wide transcription in two biological replicates of MIA PaCa-2 cells, data of replicate 1 is presented here.

| <b>Name</b>             | <b>SIZE</b> | <b>NES</b> | <b>FDR<br/>q-val</b> | <b>NOM p-<br/>val</b> |
|-------------------------|-------------|------------|----------------------|-----------------------|
| E2F1_Q6                 | 205         | -2.4       | 0.00                 | 0.000                 |
| E2F4DP2_01              | 202         | -2.3       | 0.00                 | 0.000                 |
| E2F_Q6                  | 205         | -2.3       | 0.00                 | 0.000                 |
| E2F_02                  | 203         | -2.3       | 0.00                 | 0.000                 |
| E2F1_Q3                 | 207         | -2.3       | 0.00                 | 0.000                 |
| E2F1_Q6_01              | 206         | -2.3       | 0.00                 | 0.000                 |
| E2F1DP2_01              | 202         | -2.3       | 0.00                 | 0.000                 |
| E2F4DP1_01              | 206         | -2.3       | 0.00                 | 0.000                 |
| E2F1DP1_01              | 202         | -2.3       | 0.00                 | 0.000                 |
| E2F_Q4                  | 206         | -2.3       | 0.00                 | 0.000                 |
| E2F1DP1RB_01            | 196         | -2.2       | 0.00                 | 0.000                 |
| E2F_Q3                  | 191         | -2.2       | 0.00                 | 0.000                 |
| E2F1_Q4_01              | 194         | -2.2       | 0.00                 | 0.000                 |
| SGCGSSAAA_E2F1DP2_01    | 149         | -2.2       | 0.00                 | 0.000                 |
| E2F_Q3_01               | 199         | -2.2       | 0.00                 | 0.000                 |
| E2F_01                  | 58          | -2.0       | 0.00                 | 0.000                 |
| E2F_Q4_01               | 197         | -2.0       | 0.00                 | 0.000                 |
| NFMUE1_Q6               | 216         | -2.0       | 0.00                 | 0.000                 |
| GCCATNTTG_YY1_Q6        | 388         | -1.9       | 0.00                 | 0.000                 |
| E2F_Q6_01               | 196         | -1.9       | 0.00                 | 0.000                 |
| TCCCRNNRTGC_UNKNOWN     | 179         | -1.9       | 0.00                 | 0.000                 |
| GCGSCMNTTT_UNKNOWN      | 66          | -1.9       | 0.00                 | 0.000                 |
| KRCTCNNNNMANAGC_UNKNOWN | 54          | -1.9       | 0.00                 | 0.000                 |
| TMTCGCGANR_UNKNOWN      | 152         | -1.8       | 0.00                 | 0.001                 |

**Table S19.** Top 29 enriched function term from the down-regulated genes in response to YUM70 treatment in MIA PaCa-2 using STRING protein-protein interaction network. Nascent RNA Bru-seq was used to assess the effect of YUM70 on genome-wide transcription in two biological replicates of MIA PaCa-2 cells, data of replicate 1 is presented here.

| <b>GO term</b> | <b>Description</b>                                                       | <b>Genes mapped</b> | <b>Enrichment Scores</b> | <b>FDR q-val</b> |
|----------------|--------------------------------------------------------------------------|---------------------|--------------------------|------------------|
| GO:0010032     | meiotic chromosome condensation                                          | 5                   | 3.18                     | 0.002            |
| GO:0070601     | centromeric sister chromatid cohesion                                    | 7                   | 2.78                     | 0.001            |
| GO:0051988     | regulation of attachment of spindle microtubules to kinetochore          | 12                  | 2.42                     | 0.000            |
| GO:0090267     | positive regulation of mitotic cell cycle spindle assembly checkpoint    | 7                   | 2.24                     | 0.009            |
| GO:0090232     | positive regulation of spindle checkpoint                                | 7                   | 2.24                     | 0.009            |
| GO:1904851     | positive regulation of establishment of protein localization to telomere | 10                  | 2.19                     | 0.000            |
| GO:0070203     | regulation of establishment of protein localization to telomere          | 11                  | 2.13                     | 0.000            |
| GO:0030261     | chromosome condensation                                                  | 24                  | 2.10                     | 0.001            |
| GO:2000816     | negative regulation of mitotic sister chromatid separation               | 23                  | 2.08                     | 0.000            |
| GO:1905819     | negative regulation of chromosome separation                             | 23                  | 2.08                     | 0.000            |
| GO:0051383     | kinetochore organization                                                 | 17                  | 2.08                     | 0.000            |
| GO:0007076     | mitotic chromosome condensation                                          | 14                  | 2.06                     | 0.000            |
| GO:0031577     | spindle checkpoint                                                       | 23                  | 2.05                     | 0.000            |
| GO:1902100     | negative regulation of metaphase/anaphase transition of cell cycle       | 22                  | 2.03                     | 0.000            |
| GO:0045841     | negative regulation of mitotic metaphase/anaphase transition             | 22                  | 2.03                     | 0.000            |
| GO:0070202     | regulation of establishment of protein localization to chromosome        | 12                  | 2.03                     | 0.000            |
| GO:0071174     | mitotic spindle checkpoint                                               | 21                  | 2.00                     | 0.000            |
| GO:0071173     | spindle assembly checkpoint                                              | 21                  | 2.00                     | 0.000            |
| GO:0007094     | mitotic spindle assembly checkpoint                                      | 21                  | 2.00                     | 0.000            |
| GO:0007077     | mitotic nuclear envelope disassembly                                     | 12                  | 1.99                     | 0.001            |
| GO:0051985     | negative regulation of chromosome segregation                            | 28                  | 1.97                     | 0.000            |
| GO:0033046     | negative regulation of sister chromatid segregation                      | 28                  | 1.97                     | 0.000            |
| GO:0051292     | nuclear pore complex assembly                                            | 10                  | 1.92                     | 0.000            |
| GO:0033048     | negative regulation of mitotic sister chromatid segregation              | 26                  | 1.92                     | 0.000            |
| GO:0006999     | nuclear pore organization                                                | 15                  | 1.84                     | 0.000            |
| GO:0071459     | protein localization to chromosome, centromeric region                   | 18                  | 1.80                     | 0.000            |
| GO:0010965     | regulation of mitotic sister chromatid separation                        | 51                  | 1.76                     | 0.000            |
| GO:0018206     | peptidyl-methionine modification                                         | 10                  | 1.72                     | 0.008            |
| GO:1905818     | regulation of chromosome separation                                      | 54                  | 1.71                     | 0.000            |

**Table S20.** Top 25 enriched cellular component from the down-regulated genes in response to YUM70 treatment in MIA PaCa-2 using STRING protein-protein interaction network. Nascent RNA Bru-seq was used to assess the effect of YUM70 on genome-wide transcription in two biological replicates of MIA PaCa-2 cells, data of replicate 1 is presented here.

| <b>GO term</b> | <b>Description</b>                             | <b>Genes mapped</b> | <b>Enrichment Scores</b> | <b>FDR q-val</b> |
|----------------|------------------------------------------------|---------------------|--------------------------|------------------|
| GO:0097149     | centralspindlin complex                        | 3                   | 4.80                     | 0.000            |
| GO:0000942     | condensed nuclear chromosome outer kinetochore | 4                   | 4.10                     | 0.000            |
| GO:0000796     | condensin complex                              | 7                   | 3.34                     | 0.000            |
| GO:0000940     | condensed chromosome outer kinetochore         | 11                  | 3.22                     | 0.000            |
| GO:0070937     | CRD-mediated mRNA stability complex            | 5                   | 2.37                     | 0.009            |
| GO:0000778     | condensed nuclear chromosome kinetochore       | 13                  | 2.30                     | 0.000            |
| GO:0002199     | zona pellucida receptor complex                | 7                   | 2.01                     | 0.002            |
| GO:0042382     | paraspeckles                                   | 6                   | 1.90                     | 0.005            |
| GO:0097431     | mitotic spindle pole                           | 23                  | 1.90                     | 0.001            |
| GO:0005726     | perichromatin fibrils                          | 5                   | 1.87                     | 0.007            |
| GO:0031618     | nuclear pericentric heterochromatin            | 8                   | 1.85                     | 0.004            |
| GO:0000777     | condensed chromosome kinetochore               | 101                 | 1.58                     | 0.000            |
| GO:0000779     | condensed chromosome, centromeric region       | 114                 | 1.54                     | 0.000            |
| GO:0005876     | spindle microtubule                            | 44                  | 1.45                     | 0.000            |
| GO:0000776     | kinetochore                                    | 127                 | 1.44                     | 0.000            |
| GO:0072686     | mitotic spindle                                | 81                  | 1.43                     | 0.000            |
| GO:0005832     | chaperonin-containing T-complex                | 10                  | 1.42                     | 0.007            |
| GO:0000775     | chromosome, centromeric region                 | 182                 | 1.35                     | 0.000            |
| GO:0101031     | chaperone complex                              | 18                  | 1.28                     | 0.005            |
| GO:0000922     | spindle pole                                   | 141                 | 1.24                     | 0.000            |
| GO:0044815     | DNA packaging complex                          | 80                  | 1.21                     | 0.000            |
| GO:0005721     | pericentric heterochromatin                    | 18                  | 1.20                     | 0.009            |
| GO:0030894     | replisome                                      | 15                  | 1.20                     | 0.002            |
| GO:0034719     | SMN-Sm protein complex                         | 17                  | 1.18                     | 0.001            |
| GO:0000793     | condensed chromosome                           | 196                 | 1.17                     | 0.000            |

**Table S21.** Top 25 enriched reactome pathways from the down-regulated genes in response to YUM70 treatment in MIA PaCa-2 using STRING protein-protein interaction network. Nascent RNA Bru-seq was used to assess the effect of YUM70 on genome-wide transcription in two biological replicates of MIA PaCa-2 cells, data of replicate 1 is presented here.

| Pathways    | Description                                                                                                                 | Genes mapped | Enrichment Scores | FDR q-val |
|-------------|-----------------------------------------------------------------------------------------------------------------------------|--------------|-------------------|-----------|
| HSA-176417  | Phosphorylation of Emi1                                                                                                     | 6            | 3.15              | 0.000     |
| HSA-2514853 | Condensation of Prometaphase Chromosomes                                                                                    | 11           | 2.97              | 0.000     |
| HSA-2980767 | Activation of NIMA Kinases NEK9, NEK6, NEK7                                                                                 | 7            | 2.53              | 0.001     |
| HSA-113507  | E2F-enabled inhibition of pre-replication complex formation                                                                 | 9            | 2.28              | 0.000     |
| HSA-68884   | Mitotic Telophase/Cytokinesis                                                                                               | 14           | 2.21              | 0.000     |
| HSA-75035   | Chk1/Chk2(Cds1) mediated inactivation of Cyclin B:Cdk1 complex                                                              | 13           | 1.95              | 0.000     |
| HSA-156711  | Polo-like kinase mediated events                                                                                            | 16           | 1.84              | 0.000     |
| HSA-390450  | Folding of actin by CCT/TriC                                                                                                | 10           | 1.84              | 0.000     |
| HSA-2468052 | Establishment of Sister Chromatid Cohesion                                                                                  | 11           | 1.70              | 0.002     |
| HSA-2299718 | Condensation of Prophase Chromosomes                                                                                        | 34           | 1.66              | 0.000     |
| HSA-69273   | Cyclin A/B1/B2 associated events during G2/M transition                                                                     | 23           | 1.65              | 0.003     |
| HSA-2470946 | Cohesin Loading onto Chromatin                                                                                              | 10           | 1.63              | 0.005     |
| HSA-141444  | Amplification of signal from unattached kinetochores via a MAD2 inhibitory signal                                           | 89           | 1.57              | 0.000     |
| HSA-141424  | Amplification of signal from the kinetochores                                                                               | 89           | 1.57              | 0.000     |
| HSA-774815  | Nucleosome assembly                                                                                                         | 46           | 1.49              | 0.000     |
| HSA-606279  | Deposition of new CENPA-containing nucleosomes at the centromere                                                            | 46           | 1.49              | 0.000     |
| HSA-3301854 | Nuclear Pore Complex (NPC) Disassembly                                                                                      | 32           | 1.47              | 0.000     |
| HSA-2500257 | Resolution of Sister Chromatid Cohesion                                                                                     | 112          | 1.47              | 0.000     |
| HSA-69618   | Mitotic Spindle Checkpoint                                                                                                  | 104          | 1.45              | 0.000     |
| HSA-68877   | Mitotic Prometaphase                                                                                                        | 184          | 1.39              | 0.000     |
| HSA-141405  | Inhibition of the proteolytic activity of APC/C required for the onset of anaphase by mitotic spindle checkpoint components | 19           | 1.37              | 0.001     |
| HSA-141430  | Inactivation of APC/C via direct inhibition of the APC/C complex                                                            | 19           | 1.37              | 0.001     |
| HSA-4615885 | SUMOylation of DNA replication proteins                                                                                     | 40           | 1.34              | 0.000     |
| HSA-176412  | Phosphorylation of the APC/C                                                                                                | 18           | 1.34              | 0.002     |
| HSA-180746  | Nuclear import of Rev protein                                                                                               | 30           | 1.32              | 0.000     |

**Table S22.** Top 7 enriched INTERPRO Protein Domains and Features from the down-regulated genes in response to YUM70 treatment in MIA PaCa-2 using STRING protein-protein interaction network. Nascent RNA Bru-seq was used to assess the effect of YUM70 on genome-wide transcription in two biological replicates of MIA PaCa-2 cells, data of replicate 1 is presented here.

| <b>Domain</b> | <b>Description</b>                           | <b>Genes mapped</b> | <b>Enrichment Scores</b> | <b>FDR q-val</b> |
|---------------|----------------------------------------------|---------------------|--------------------------|------------------|
| IPR001494     | Importin-beta, N-terminal domain             | 17                  | 1.24                     | 0.009            |
| IPR003034     | SAP domain                                   | 20                  | 1.02                     | 0.006            |
| IPR007125     | Histone H2A/H2B/H3                           | 31                  | 0.97                     | 0.006            |
| IPR000504     | RNA recognition motif domain                 | 178                 | 0.72                     | 0.000            |
| IPR001650     | Helicase, C-terminal                         | 103                 | 0.51                     | 0.006            |
| IPR014001     | Helicase superfamily 1/2, ATP-binding domain | 105                 | 0.50                     | 0.006            |
| IPR011989     | Armadillo-like helical                       | 172                 | 0.50                     | 0.003            |

**Table S23.** Combination index (CI) values for drug combinations calculated in CompuSyn software.

| <b>YUM70<br/>(<math>\mu\text{M}</math>)</b> | <b>Topo<br/>(<math>\mu\text{M}</math>)</b> | <b>Effect</b> | <b>CI</b> | <b>YUM70<br/>(<math>\mu\text{M}</math>)</b> | <b>SAHA<br/>(<math>\mu\text{M}</math>)</b> | <b>Effect</b> | <b>CI</b> |
|---------------------------------------------|--------------------------------------------|---------------|-----------|---------------------------------------------|--------------------------------------------|---------------|-----------|
| 1.0                                         | 0.01                                       | 0.77          | 0.59      | 1.0                                         | 0.3                                        | 0.79          | 0.29      |
| 0.3                                         | 0.01                                       | 0.38          | 0.93      | 0.3                                         | 0.3                                        | 0.47          | 0.56      |
| 0.3                                         | 0.03                                       | 0.95          | 0.78      | 1.0                                         | 0.1                                        | 0.37          | 0.70      |

CI < 1 is defined as synergism

## Supplementary figure legends

**Figure S1. Cytotoxicity of YUM70 in a panel of cancer cell lines.** **A.** YUM 70 dose-dependently decreased PANC-1 and UM59 cell proliferation in 3D-culture systems. The diameters of the spheroids ( $n = 6$ ) generated from PANC-1 and UM59 cells were calculated using ImageJ software package (NIH). Data are presented as mean  $\pm$  SD of three or more spheroids from three independent experiments.  $*p < 0.01$ ,  $** p < 0.001$ ,  $***p < 0.0001$ . **B.**  $IC_{50}$  values were determined in a panel of 11 cell lines using MTT assay in 2D culture system. Data are presented as mean  $\pm$  SD of three independent experiments performed in duplicate. **C.** YUM70 dose-dependently decreased OVCAR-8 cell proliferation in 3D-culture systems. The cell viability of 3D spheroids was determined with CellTiter-Glo® 3D cell viability assay. Diameters were quantified as described in A.

**Figure S2. Microsomal stability and pharmacokinetic properties of YUM70.** **A.** Metabolic stability was assessed in human liver microsomes in the presence of NADPH. **B.** PK parameters were estimated using non-compartmentalized analysis using Phoenix/WINONLIN. YUM70 concentrations ( $ng/mL$ ) in mouse plasma were determined at various time points. For IV (intravenous) route, YUM70 was administered at 15 mg/kg and for PO (per os) route, YUM70 was administered at 30 mg/kg. **C.** PK parameters of YUM70 in plasma following IV and PO administration are as follows:  $C_0$  = Initial concentration,  $AUC(0-t_{ldc})$  = Area under the concentration-time curve from time zero to time of last detectable concentration,  $AUC(0-inf)$  = Area under the concentration-time curve from time zero to infinity,  $CL$  = Systemic clearance,  $V_{ss}$ : Volume of distribution at steady state,  $Bioavailability = (AUC_T \times Dose_{iv}) / (AUC_{iv} \times Dose_T) \times 100\%$ , Terminal elimination half-life ( $t_{1/2}$ ) was calculated based on data points ( $n = 3$ ) in the terminal phase.



**Figure S3.** DAVID functional annotation analysis was performed on nascent RNA Bru-seq data sets to generate signaling pathways upregulated (A) and downregulated (B) in response to YUM70 treatment. The analysis (10)(9)(12)(11)(10) was performed on the list of up- and downregulated genes with a fold change  $\geq 2$  of replicate 1. Of note .Genome-wide transcription was assessed in two biological replicates of MIA PaCa-2 cells treated with YUM70 (see Figure S5).

**Figure S4. ER stress related proteins and mRNA levels in pancreatic cancer cells in response to YUM70.** A. Lysates of MIA PaCa-2, PANC-1, and BxPC-3 cells treated with YUM70 at indicated doses were immunoblotted. Relative expression (fold change) of GRP78 and CHOP normalized to actin expression were calculated from the intensity of bands and are presented. A representative experiment out of three is shown in Figure 2. The band intensity was quantified in Image Studio Ver 3.1 software (LI-COR) from three independent experiments and presented as mean fold change  $\pm$  SD. The *p*-values were calculated using Student's *t*-test, \**p* < 0.05, \*\**p* < 0.01, \*\*\**p* < 0.001. B-C. mRNA levels of GRP78, CHOP, and CHAC1 in MIA PaCA-2 and PANC-1 cells treated with YUM70. The fold change of normalized mRNA levels were calculated by measuring band intensity. The band intensity quantified in ImageJ software from three independent experiments and presented as mean fold change  $\pm$  SD at the indicated time (hr) and dose ( $\mu$ M). The *p*-value was calculated using Student's *t*-test, \**p* < 0.05, \*\**p* < 0.01, \*\*\**p* < 0.001. D. Loading control for CHAC1 Western blot used in Figure 2C.

**Figure S5. GSEA analysis of transcription after YUM70 treatment reveals increased transcription of ER stress-related genes, UPR, and apoptosis signaling pathways; and decreased transcription of E2F and targets, MYC and targets, and G2M checkpoint.** Nascent RNA Bru-seq was used to assess the effect of YUM70 on genome-wide transcription in two biological replicates of MIA PaCa-2 cells. A. common up and down-regulated genes are shown for

two experiments. GSEA of Hallmark pathways and GO biological process using log<sub>2</sub>-fold rank-ordered upregulated genes in MIA PaCa-2 cells for Experiment 1 (**Ai and Aii**) and Experiment 2 (**Bi and Bii**), respectively. GSEA of Hallmark pathways and GO biological processes using log<sub>2</sub>-fold rank-ordered downregulated genes in MIA PaCa-2 cells for Experiment 1 (**Aiii and Aiv**) and Experiment 2 (**Biii and Biv**) cells, respectively.

**Figure S6. YUM70 treatment did not show significant effects on cell cycle progression. A.** GSEA plot for G2M checkpoint pathway. **B.** Cell-cycle analysis by flow cytometry of MIA PaCa-2 cells treated with YUM70 at indicated doses and time. **C.** Quantification from three independent experiments of cell-cycle analysis of MIA PaCa-2 cells at indicated doses and time.

**Figure S7. YUM70 upregulates proteins involved in the apoptotic pathway. A.** Top panel. Lysates of BxPC-3 cells treated with YUM70 at indicated doses and times were immunoblotted with indicated antibodies. Normalized relative densities computed using ImageJ (NIH) are shown above. Bottom panel. Effect of YUM70 on BxPC-3 cells assessed by the Annexin V-FITC apoptosis assay. YUM70 treated cells were stained with Annexin V-FITC and propidium iodide (PI) and analyzed by flow cytometry. Left, cells in the bottom left quadrant of each panel (Annexin V-negative, PI-negative) are viable, whereas cells in the bottom right quadrant (Annexin V-positive, PI-negative) are in the early apoptotic stage, and cells in the top right quadrant (Annexin V-positive, PI-positive) are in the late apoptotic/necrotic stage. Right, percentage of apoptotic cells is shown in a histogram. Data are representative of two independent experiments. **B-D.** Uncut blots for caspase 3 and PARP are shown for MIA PaCa-2, PANC-1, and BxPC-3 cell lines.

**Figure S8. YUM70 specifically targets GRP78.** YUM70 stabilized GRP78 full-length protein. Unfolding curves of GRP78 full-length protein at various concentrations of **A.** YUM70 **B.** VER and **C.** YUM117, in thermal shift assays. 1%DMSO was used as control. **D.** VER destabilized

GRP78 in PANC-1 cell lysate. Melt curves of GRP78 in a PANC-1 cell lysate treated with VER (100  $\mu$ M). 1% DMSO was used as control. Data presented as mean  $\pm$  SD are from 3 independent experiments. **E-F.** YUM70 showed increased cytotoxicity in GRP78 siRNA knocked down cells. MIA PaCa-2 cells were transfected with siRNA against GRP78 siRNAs or non-specific siRNA for the indicated time. Western blot was performed on collected cell lysate at the indicated time (hr) (**E**). 24 hr post-transfection, cells were treated with YUM70 or DMSO for 72hr. Cytotoxicity was measured using MTT assay. IC<sub>50</sub> values were calculated and presented as mean  $\pm$  SD from three independent experiments performed in duplicate (**F**). YUM70 does not bind to other ER proteins PDI and GSTO-1. **G.** Inhibition of PDI determined in PDI reductase assay at compound concentration of 40  $\mu$ M. Competition between PACMA57 (probe for PDI) and YUM70 on PDI; 0.3  $\mu$ M recombinant PDI protein and 500 nM of PACMA57 were used in the presence/absence of indicated doses of YUM70 and YUM79. Fluorescence scanning (upper), and coomassie blue stain (lower). PACMA 31 is a PDI inhibitor used as a positive control and YUM79 is an analog of YUM70. **H.** Competition between CMFDA (probe for GSTO1) and YUM70 for GSTO1; 1 $\mu$ M recombinant GSTO1 protein and 500 nM of CMFDA was used in the presence or absence of compounds. Fluorescence scanning (upper), and coomassie blue stain (lower). C127 is a GSTO1 inhibitor used as a positive control. **I.** YUM70 does not bind to HSP70. CETSA melt curves for HSP70 in PANC-1 cell lysate treated with YUM70 (100  $\mu$ M). A representative image from two independent experiments is shown.

**Figure S9. GRP78 degradation by YUM-PROTAC.** **A.** Chemical structure of DX2-145 (YUM70-PROTAC). **B.** Lysates of MIA PaCa-2 cells were immunoblotted with indicated antibodies. A representative experiment is shown. **C.** Degradation of GRP78 was quantified and presented as mean  $\pm$  SD from three independent experiments. **D.** Lysates of MIA PaCa-2 cells

treated with DX2-145 in the presence or absence of MG132 (1  $\mu$ M) pre-treatment (2 hr) were immunoblotted with indicated antibodies. **E.** Chemical structure of YUM513 (YUM401-PROTAC). **F.** Lysates of MIA PaCa-2 cells were immunoblotted with indicated antibodies. A representative experiment out of three independent experiments is shown. **G.** Degradation of GRP78 is quantified and presented as mean  $\pm$  SD of three independent experiments. The *p*-value was calculated against control using Student's *t*-test, \**p* < 0.05, \*\**p* < 0.01, \*\*\**p* < 0.001, **H.** MIA PaCa-2 cells were treated with YUM513 for the indicated times and lysate analyzed by SDS-PAGE-Coomassie staining. Two bands indicated by the red box were submitted separately to the UM Proteomics Core facility for proteomics analysis. **I.** One of the two proteins identified by mass spectrometry that showed over 2 fold degradation was confirmed as GRP78.

**Figure S10. Effect of YUM-PROTAC (DX2-145) in presence of parent compounds. A.**

Lysates of MIA PaCa-2 cells treated with DX2-145 (10 $\mu$ M) in the presence or absence of YUM70 and/or pomalidomide (1, 5, and 10  $\mu$ M) pre-treatment (2 hr) were immunoblotted with indicated antibodies. **B.** Normalized GRP78 expression was calculated and presented as mean  $\pm$  SD of three independent experiments. **C.** Degradation of GRP78 is quantified at selected doses and presented as mean  $\pm$  SD of three independent experiments. **D.** Lysates of MIA PaCa-2 cells treated with DX2-145 (10 $\mu$ M) in the presence or absence of YUM401 and/or YUM117 (1, 5, and 10  $\mu$ M) pre-treatment (2 hr) were immunoblotted with indicated antibodies. **E.** Normalized GRP78 expression was calculated and presented as mean  $\pm$  SD of three independent experiments. **F.** Degradation of GRP78 is quantified at selected doses and presented as mean  $\pm$  SD of three independent experiments. The *p*-value was calculated against no treatment (NT) using Student's *t*-test, \**p* < 0.05, \*\**p* < 0.01, \*\*\**p* < 0.001.

**Figure S11. Effect of cycloheximide (CHX) and actinomycin D (ACD) on the expression of GRP78 following YUM70 treatment.** MIA PaCa-2 and PANC-1 cells were treated with CHX (2.5  $\mu$ M) 2 hr prior to YUM70 treatment. Cells were treated with YUM70 for 24 hr at indicated doses. GRP78 expression was assessed by Western blot analysis. Similarly, MIA PaCa-2 and PANC-1 cells were treated with ACD (10 nM for MIA PaCa-2 cells and 20 nM for PANC-1 cell) 2 hr prior to YUM70 treatment. Cells were treated with YUM70 for 24 hr at indicated doses. Intensity of bands were measured using Image Studio software and normalized against GRP78 expression and plotted in GraphPad prism. Data represent mean  $\pm$  SD from three independent experiments. The *p*-value was calculated using Student's *t*-test, \**p* < 0.05, \*\**p* < 0.01, \*\*\**p* < 0.001.

**Figure S12. YUM70 does not bind to the truncated protein GRP78ATPase.** Protein unfolding melt curves of GRP78 ATPase protein at various concentrations of **A.** YUM70 **B.** VER and **C.** YUM117, 1%DMSO was used as control. **D-F.** Apparent melting temperature  $T_m$  derived from thermal shift assays was determined at various concentrations. Data are presented as mean  $\pm$  SD. **G.** YUM70 does not inhibit the ATPase activity of truncated protein GRP78 contains ATPase domain. VER 155008 (VER), an HSP70/GRP78 inhibitor, significantly inhibits the ATPase activity of truncated protein GRP78 ATPase in the presence of 2  $\mu$ M ATP and 200 nM purified protein using ADP Glo assay kit (Promega). YUM70 does not inhibit the ATPase activity of the GRP78ATPase protein in the presence of 2  $\mu$ M ATP and 200 nM purified protein. Experiments were performed in triplicate.

**Figure S13: Molecular docking of YUM70 into the peptide-binding site of GRP78 substrate-binding domain.** **A.** YUM70 docked into GRP78 substrate-binding domain. **B.** Zoomed image of

the docking conformation of YUM70 in the peptide-binding site shows YUM70 interacting with indicated residues. **C.** YUM70 (pink) is superimposed onto the NR peptide (yellow). **D.** 2D docking interactions plot of YUM70 and GRP78 substrate-binding domain. **E** and **F.** 3D and 2D docking interactions between inactive analog YUM117 and GRP78 substrate-binding domain, respectively. **G.** YUM70 protects full-length GRP78 protein in partial proteolysis by trypsin. Partial protein digestion pattern of GRP78 in the presence or absence of YUM70, ATP and ADP. SDS-PAGE and Coomassie stain showing results of digestion patterns of GRP78  $\pm$  YUM70 and ATP or ADP.

**Figure S14. Expression of select ER stress markers induced by YUM70 after knockdown of GRP78 in pancreatic cancer cell lines.** MIA PaCa-2, PANC-1, BxPC-3 cells were transfected with non-specific siRNA or GRP78 siRNA-1 (**A**) and GRP78 siRNA-2 (**B**) for 24 hr. Western blot was performed on collected cell lysate. Normalized relative densities computed in Image studio Ver 3.1 software (LI-COR), relative fold change (FC) are shown above. Data are representative of two independent experiments. A colon cancer cell line HT29 has wild-type KRAS was used to determine the GRP78 knockdown efficiency of the siRNAs other than pancreatic cells.

**Figure S15. GRP78 and cleaved caspase 3 levels in treated tumor tissue collected from MIA PaCa-2 pancreatic cancer xenograft.** **A.** Cleaved caspase 3 immunohistochemistry staining in control and treated tumor sections. The percent of cleaved caspase 3 positive cells was calculated as a number of cleaved caspase 3 positive cells in the total number of cells in each field. ( $n = 10$ , 5 fields of view from 2 tumors per group). Graphical data is presented as Mean  $\pm$  SD, the  $p$ -value was calculated using Student's  $t$ -test,  $*p < 0.05$ . **B.** GRP78 immunohistochemistry staining in

control and treated tumor sections. **C.** GRP78 mRNA levels in tumor tissues. Normalized relative densities computed in ImageJ are shown above.

**Figure S16. YUM70 showed cytotoxic synergistic effect with MG132 and additive effect with 5 FU, tosedostat, or DFO. A.** Cytotoxicity of the standard-of-care drugs in pancreatic cancer cell lines. Colony formation assay of YUM70 in combination with **B-C.** MG132. **D-I.** 5FU, Tosedostat, and DFO in MIA PaCa-2 cells. Cells were treated with YUM70 with/without compounds at indicated concentration and colonies were stained and imaged. Left panel, a representative image of each combination is shown. Right panel, the number of colonies was quantified using Image Studio ver3.1 software from three independent experiments. The red box indicates wells with additive effects from combination treatment. Graphical data is presented as Mean  $\pm$  SD, the *p*-value was calculated using Student's *t*-test, \**p* < 0.05, \*\**p* < 0.01.

**Figure S1.**

**A.**

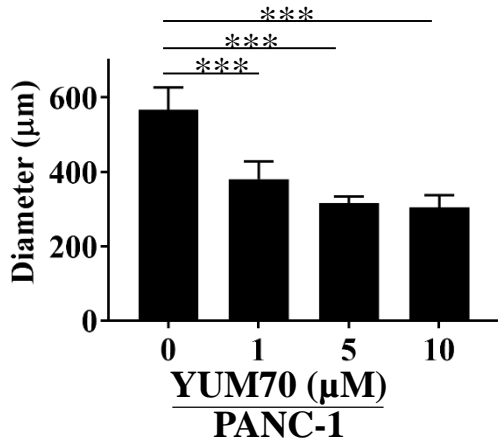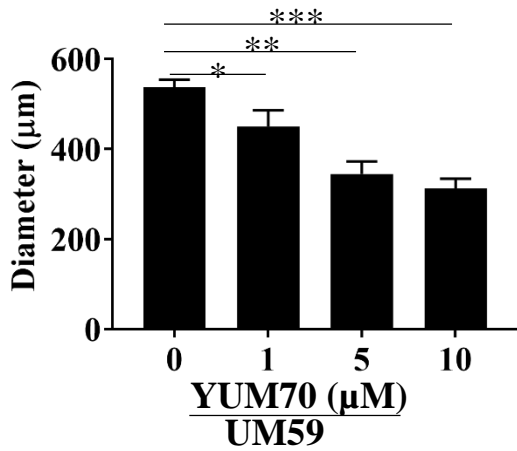

**B.**

| Cell lines    | Cytotoxicity<br>(IC <sub>50</sub> , μM) |
|---------------|-----------------------------------------|
|               | YUM70                                   |
| HCT116 p53+/+ | 4.6±0.2                                 |
| HCT116 p53-/- | 3.4±0.1                                 |
| H1299         | 4.3±1.3                                 |
| A549          | 15.7±3.5                                |
| MCF-7         | 15.3±5.4                                |
| OVCAR-8       | 3.5±0.7                                 |
| OVCAR-3       | 6.7±2.4                                 |
| Skov-3        | 21.5±0.1                                |
| SHEP-1        | 10.9±3.9                                |
| SHSY-5Y       | 4.4±0.4                                 |
| WM115         | 2.8±0.3                                 |

**C.**

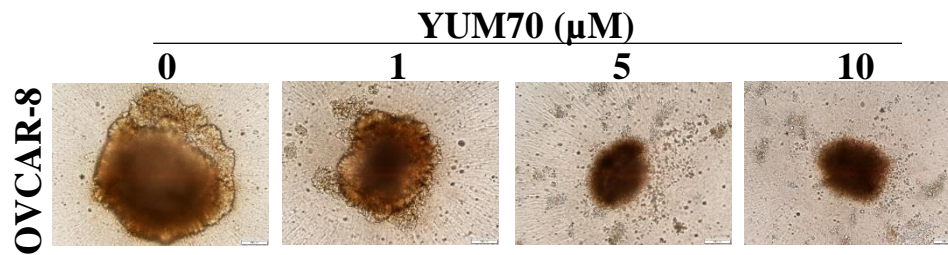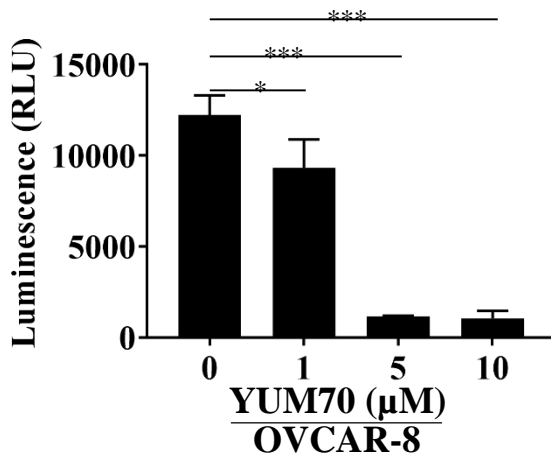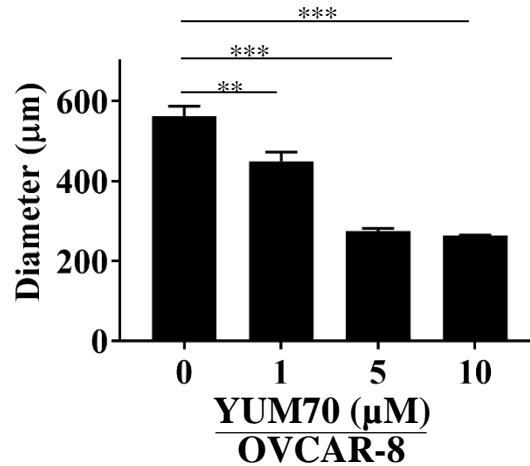





**Figure S3.**

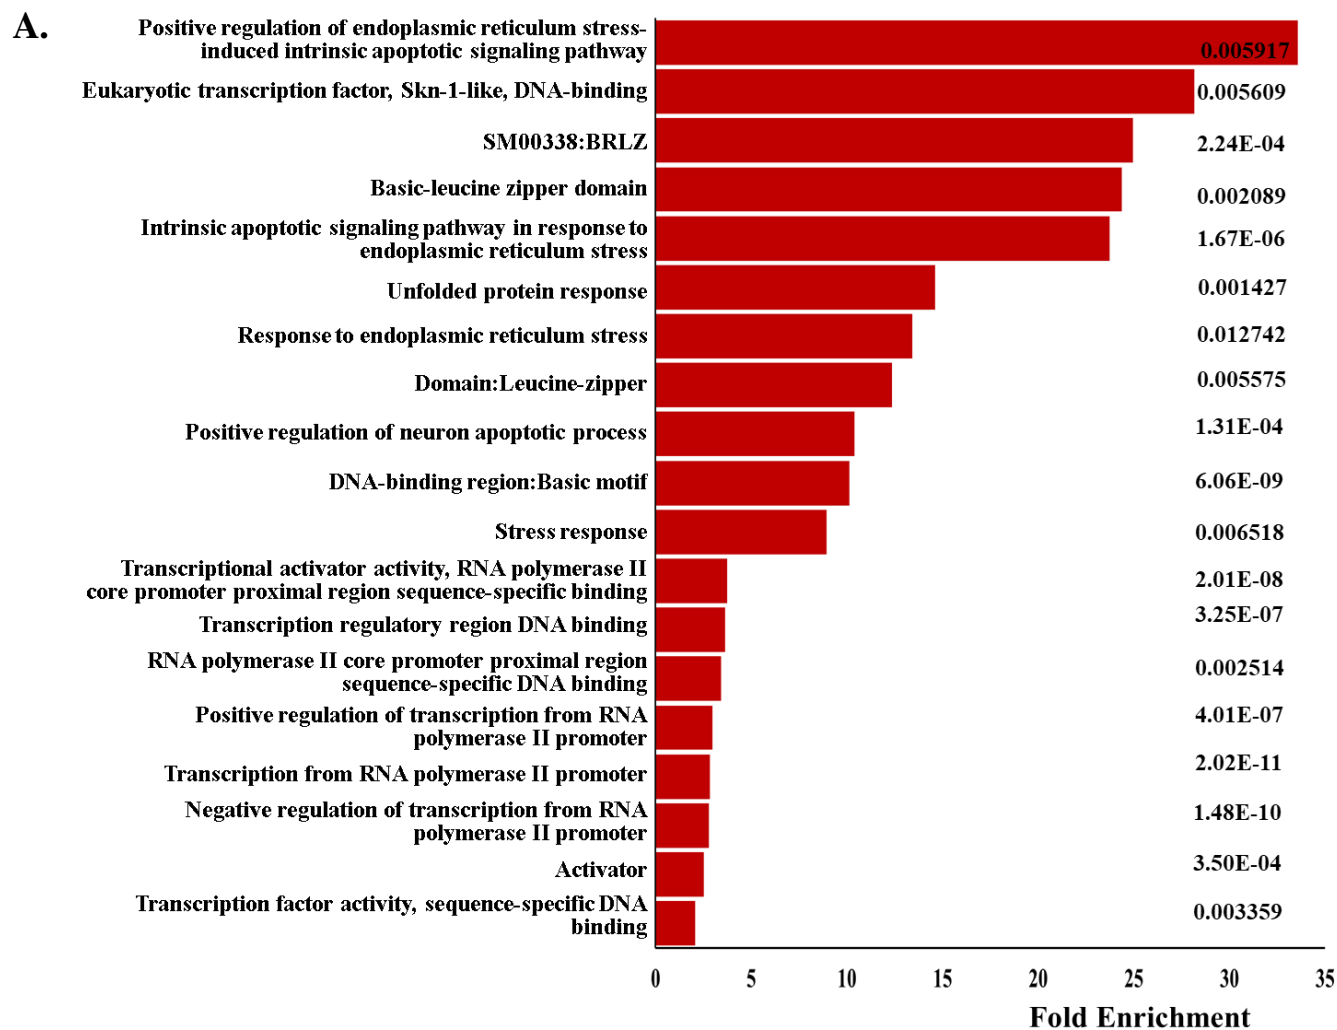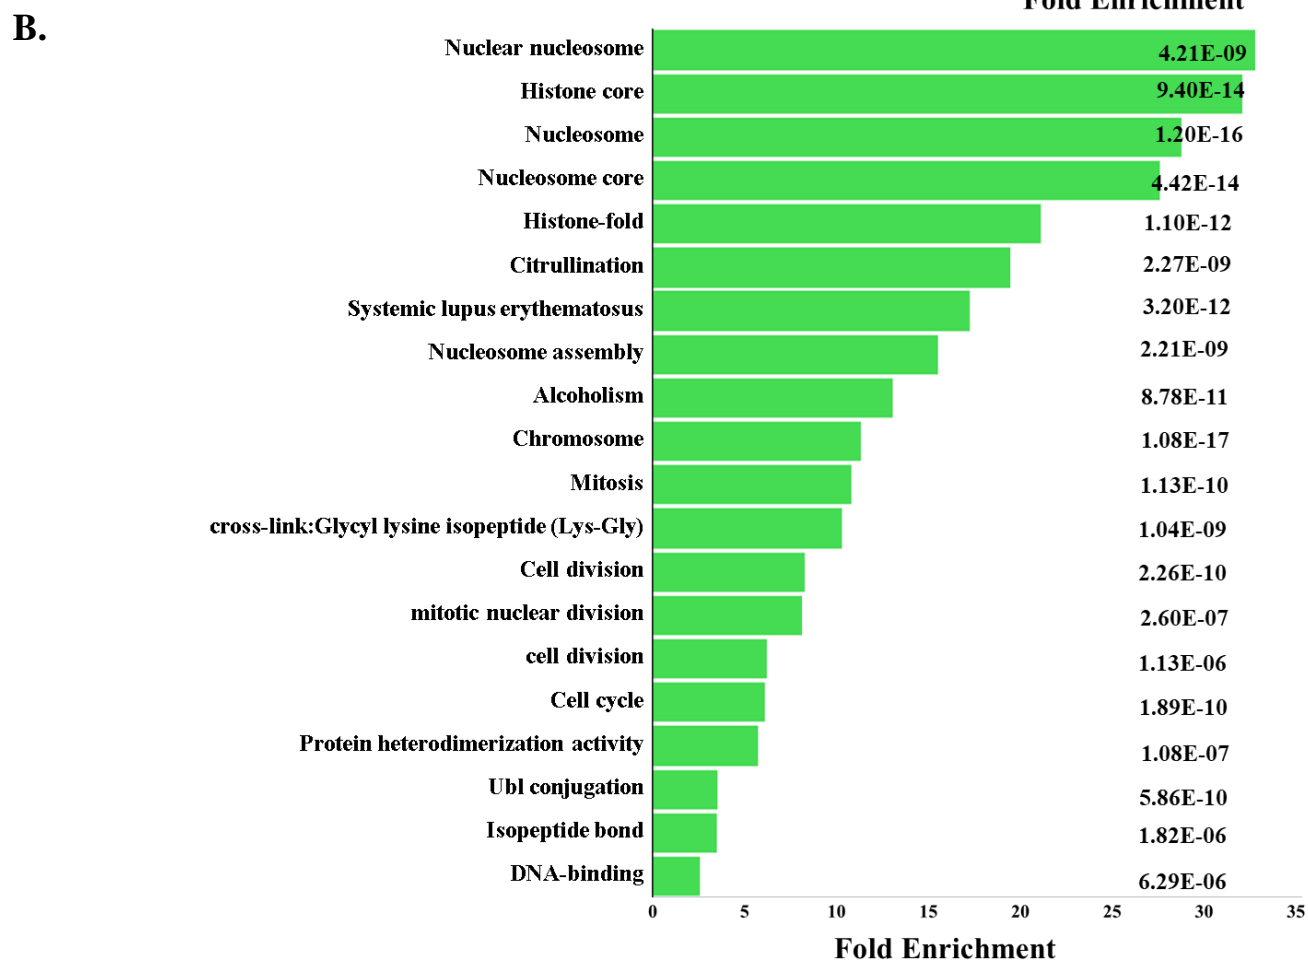

**Figure S4**

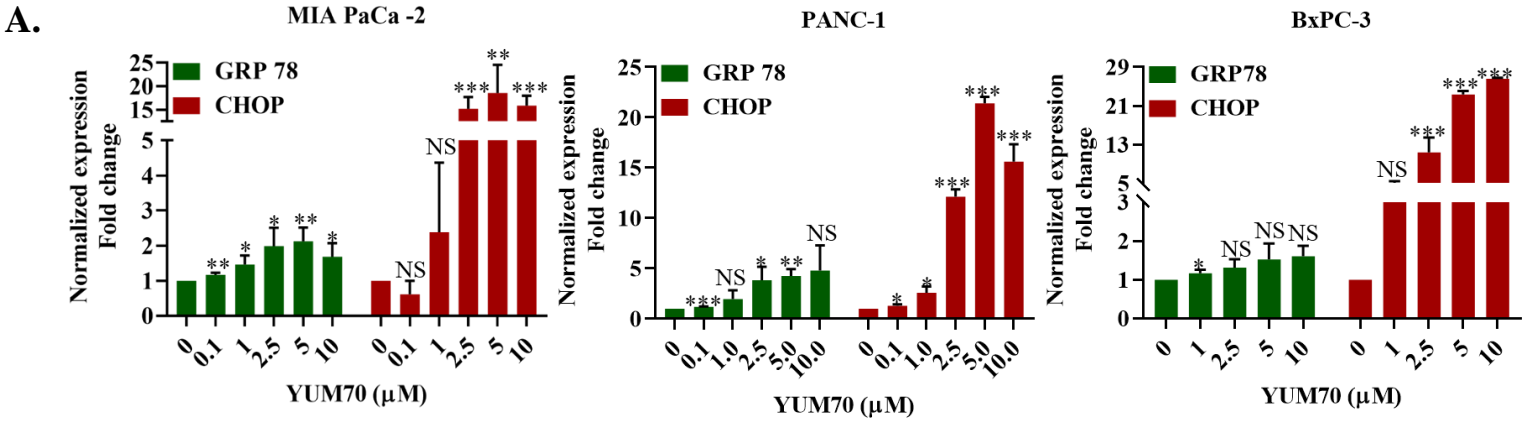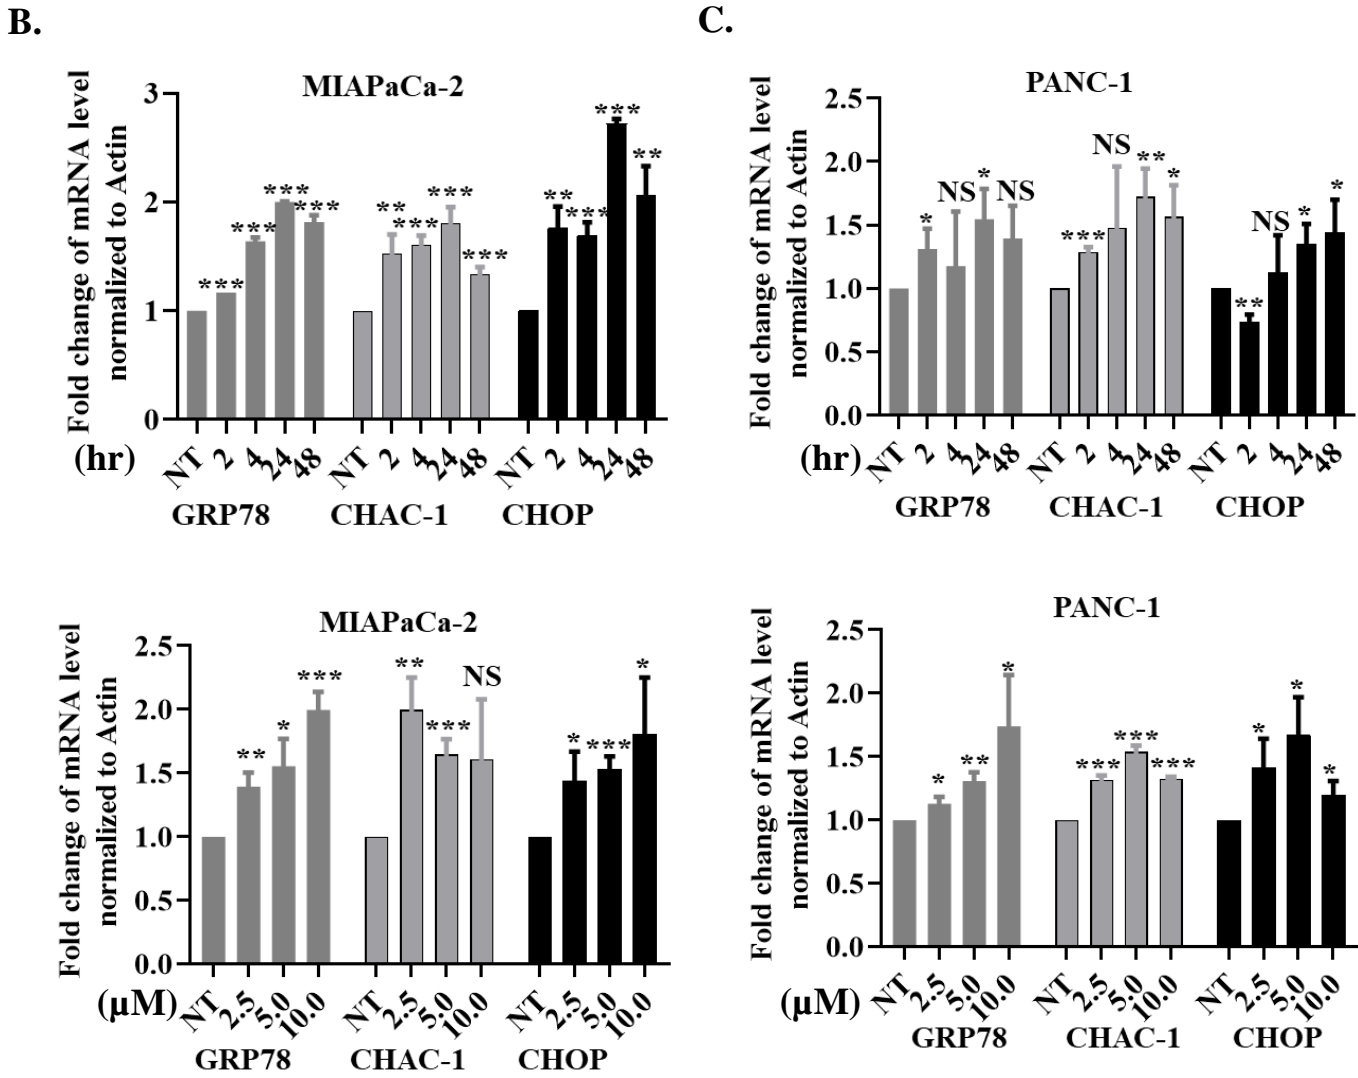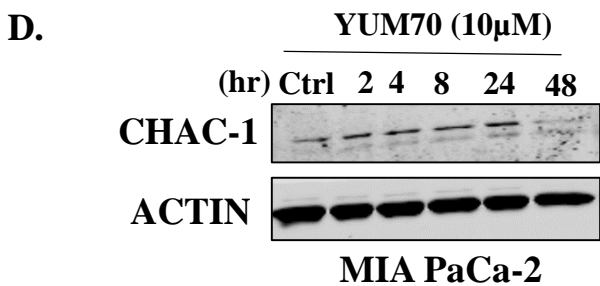

**Figure S5**

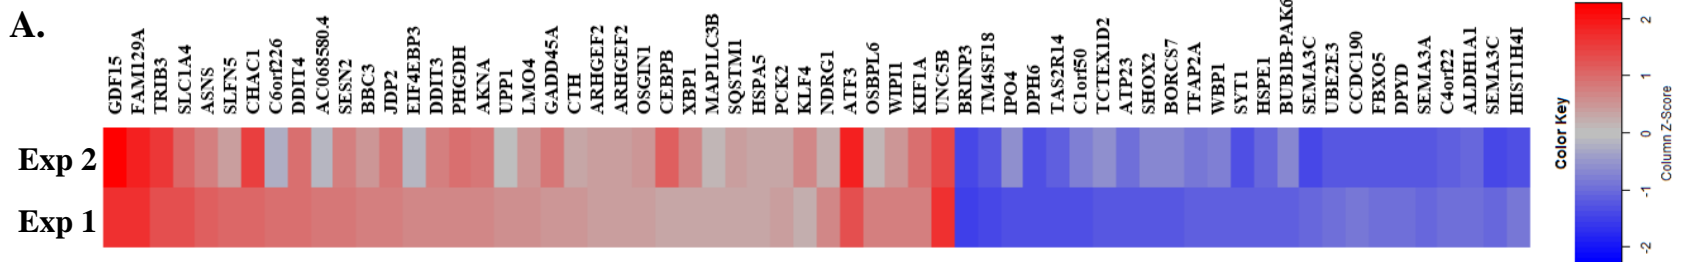

**B. Experiment 1**

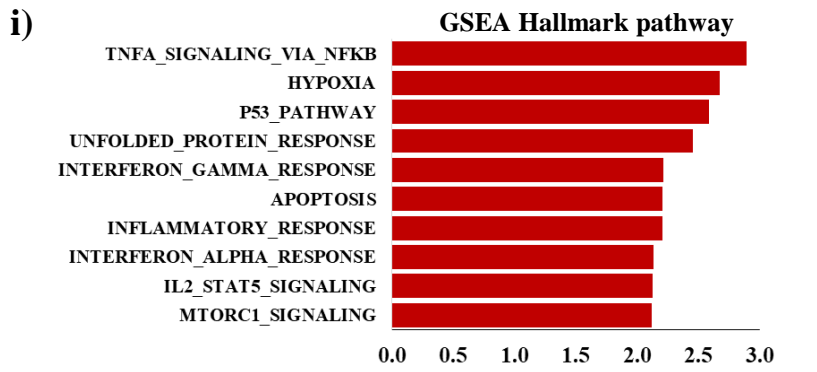

**C. Experiment 2**

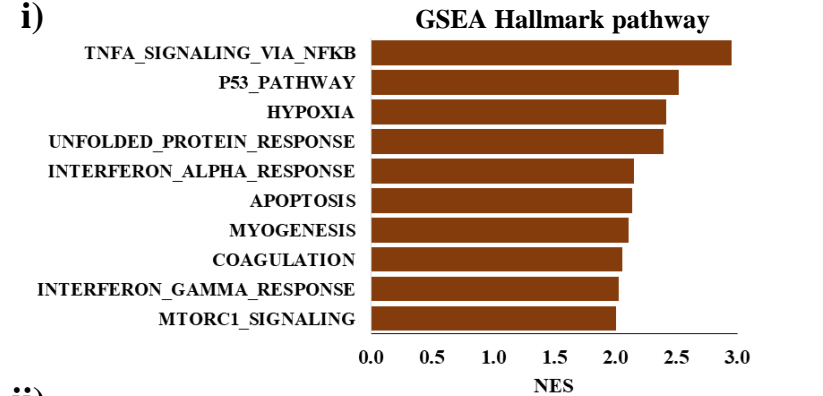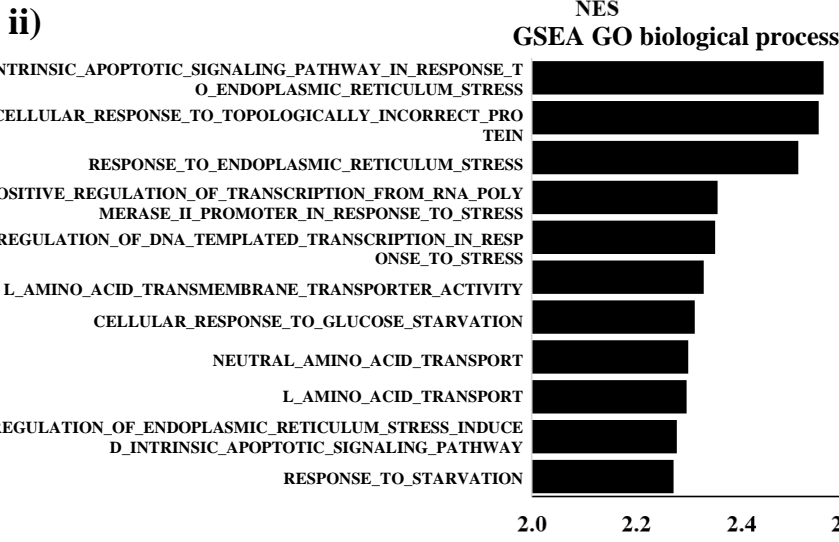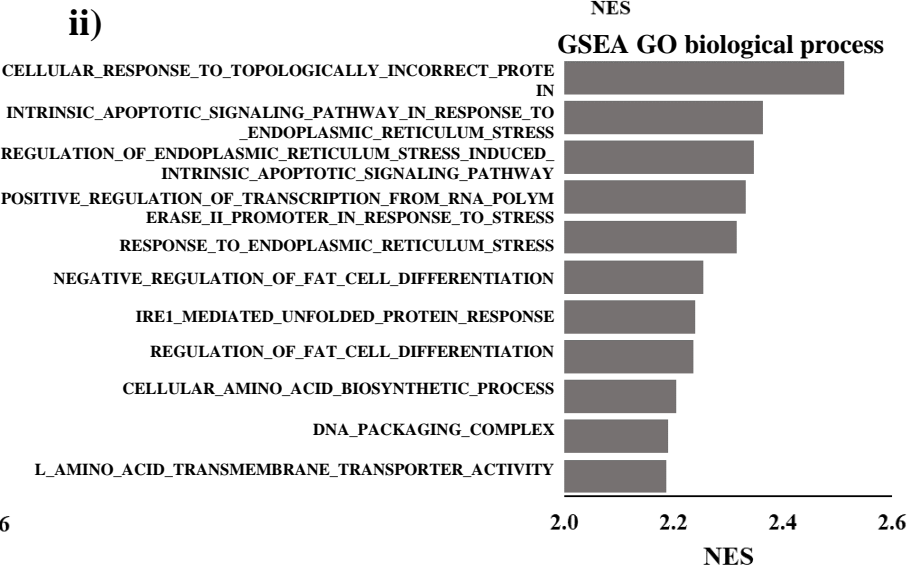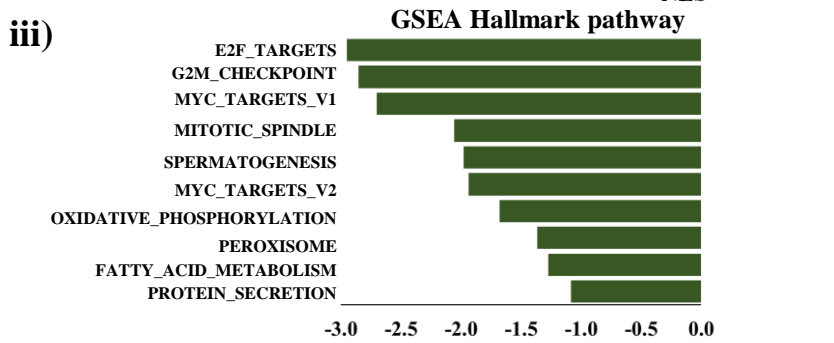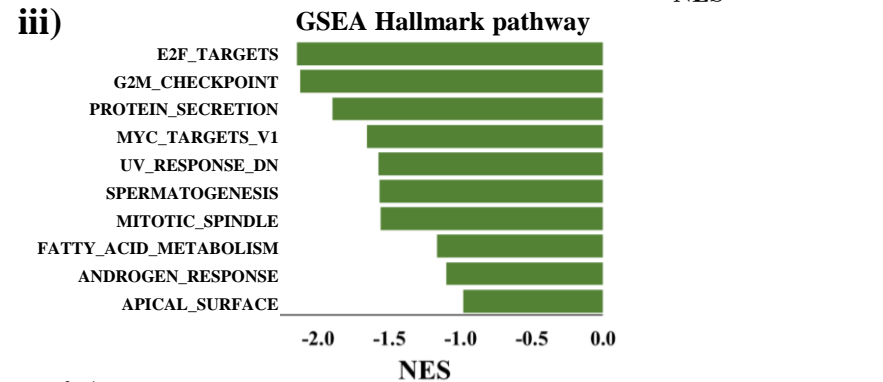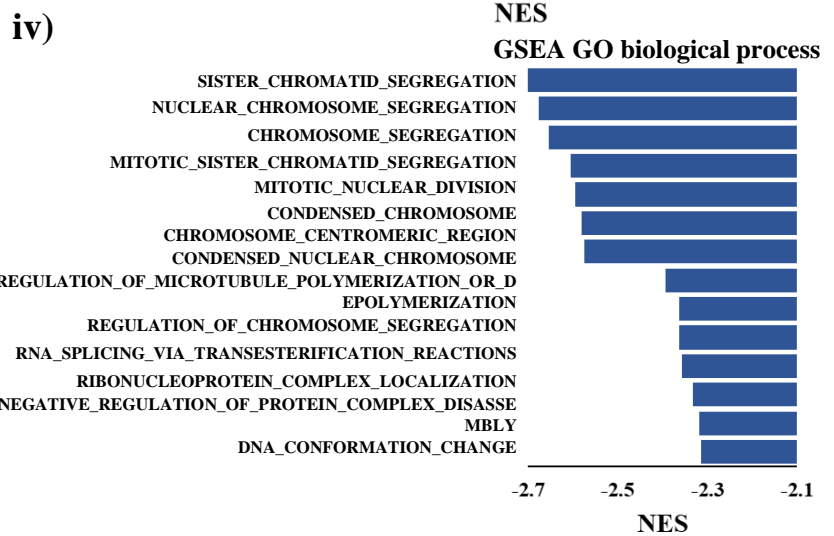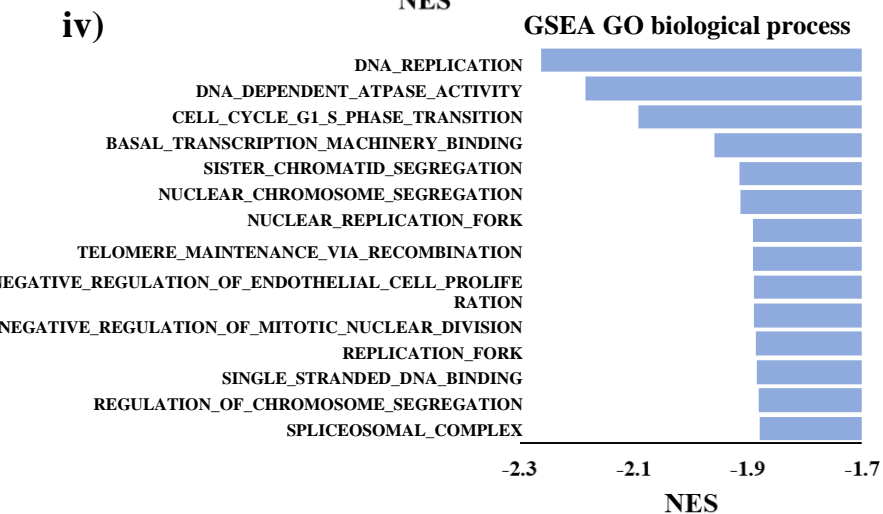

**Figure S6**

**A.**

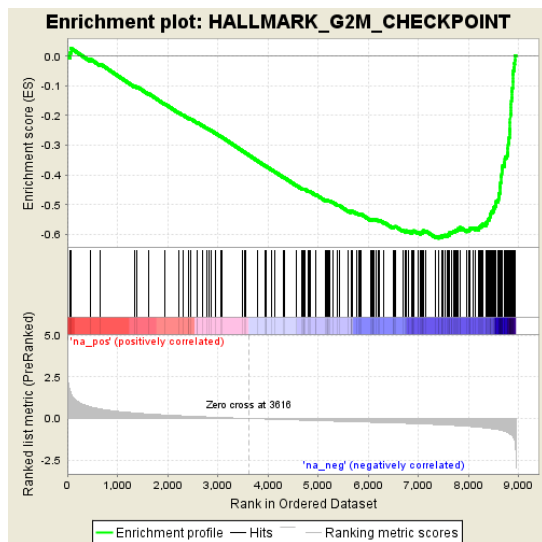

**C.**

| YUM70<br>( $\mu$ M) | 24hr |      |      |
|---------------------|------|------|------|
|                     | G1   | S    | G2   |
| 0                   | 57.3 | 29.7 | 12.9 |
| 5                   | 50.3 | 31.3 | 18.4 |
| 10                  | 51.1 | 30.5 | 18.4 |
| 15                  | 42.5 | 53.5 | 4.0  |

  

| YUM70<br>( $\mu$ M) | 48hr |      |      |
|---------------------|------|------|------|
|                     | G1   | S    | G2   |
| 0                   | 69.0 | 19.5 | 11.6 |
| 5                   | 52.0 | 33.0 | 15.0 |
| 10                  | 43.4 | 42.0 | 14.6 |
| 15                  | 33.7 | 65.4 | 0.9  |

**B.**

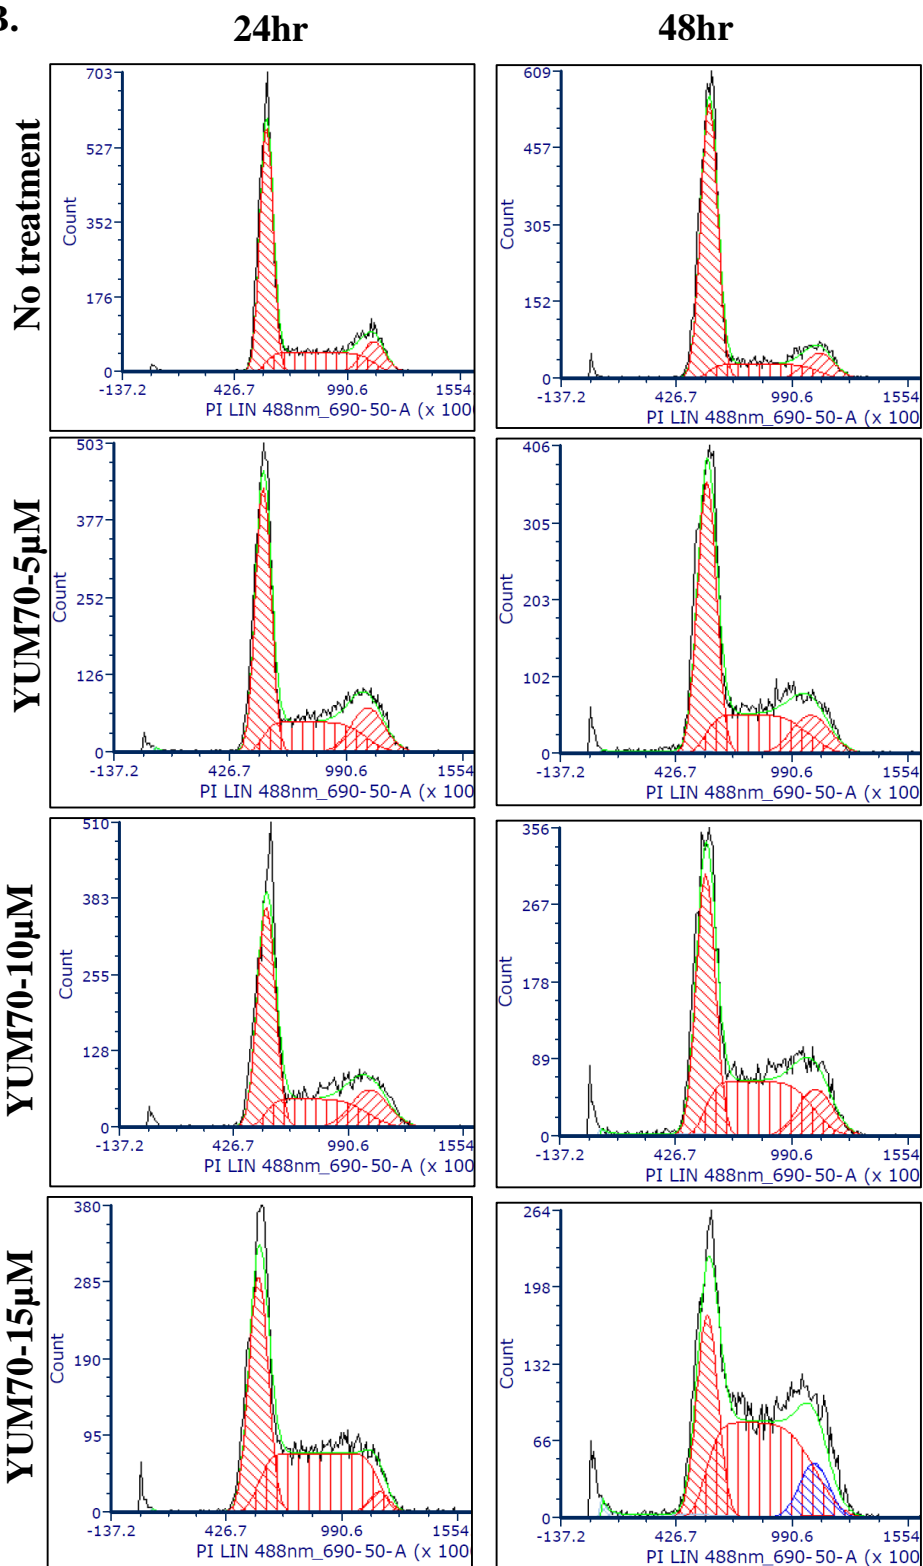

**Figure S7**

**A.**

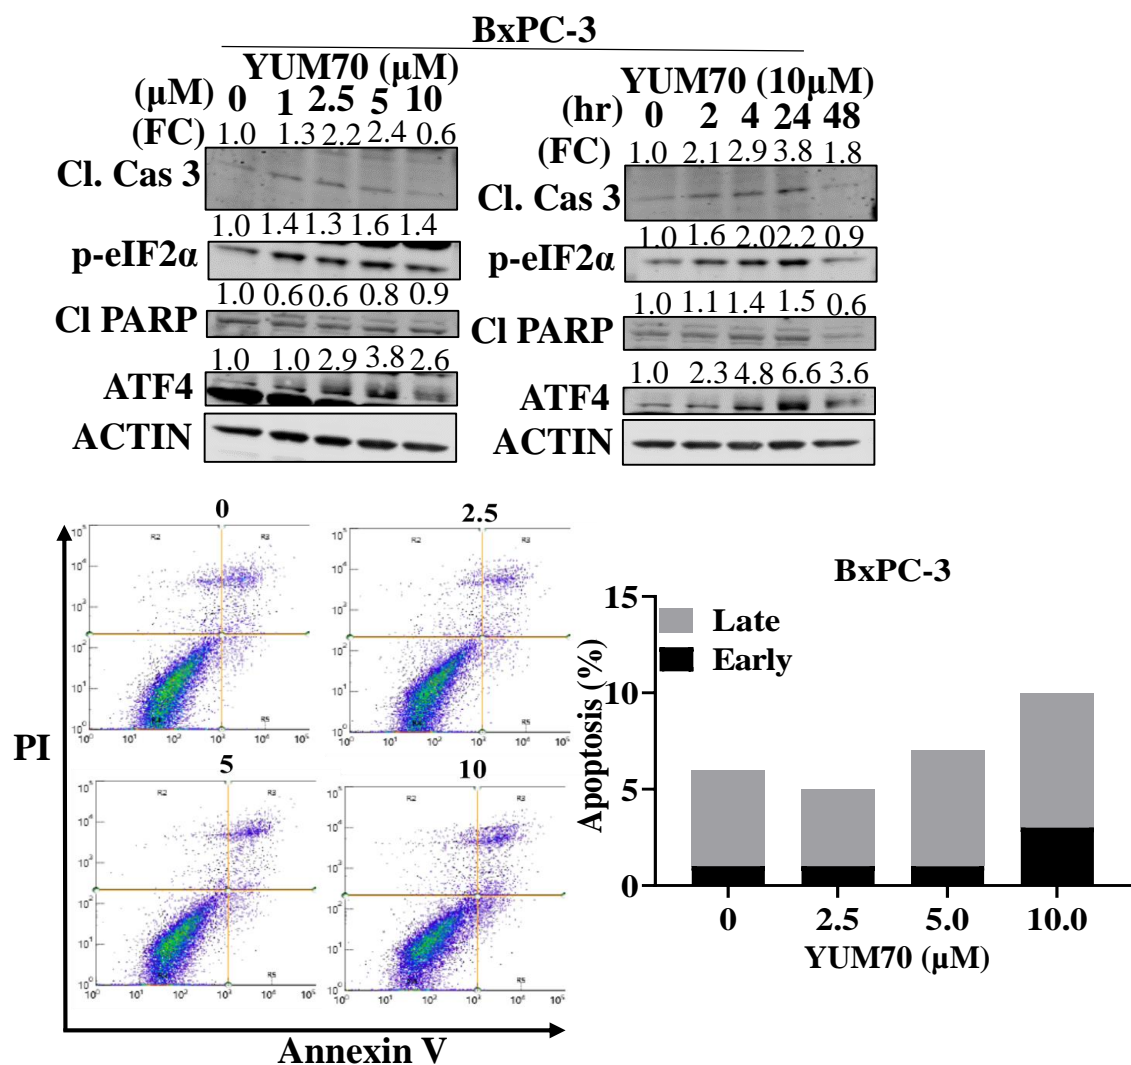

**B.**

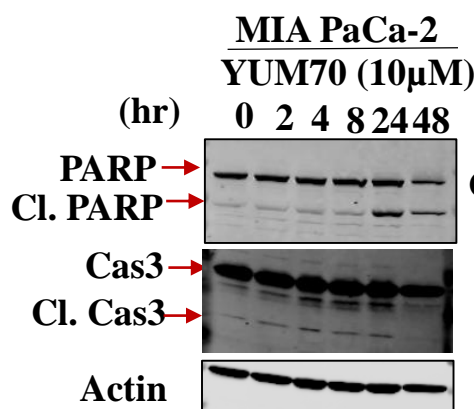

**C.**

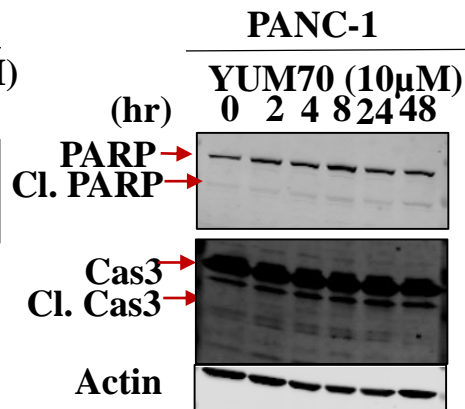

**D.**

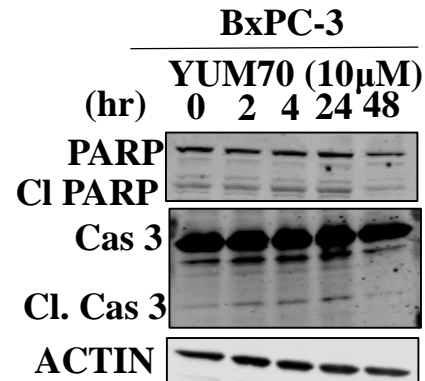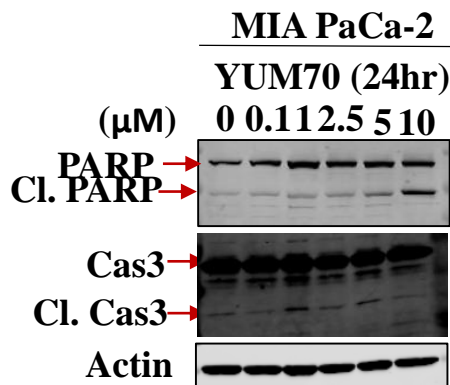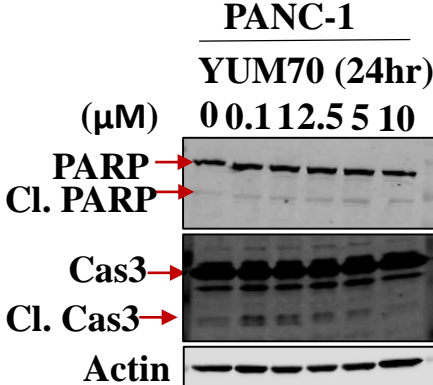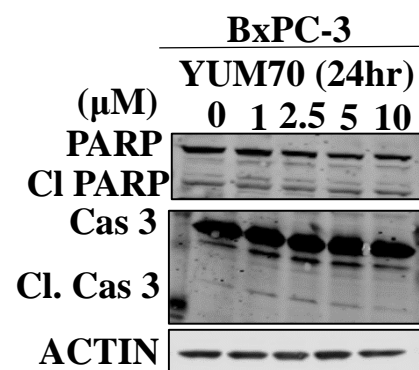

**Figure S8.**

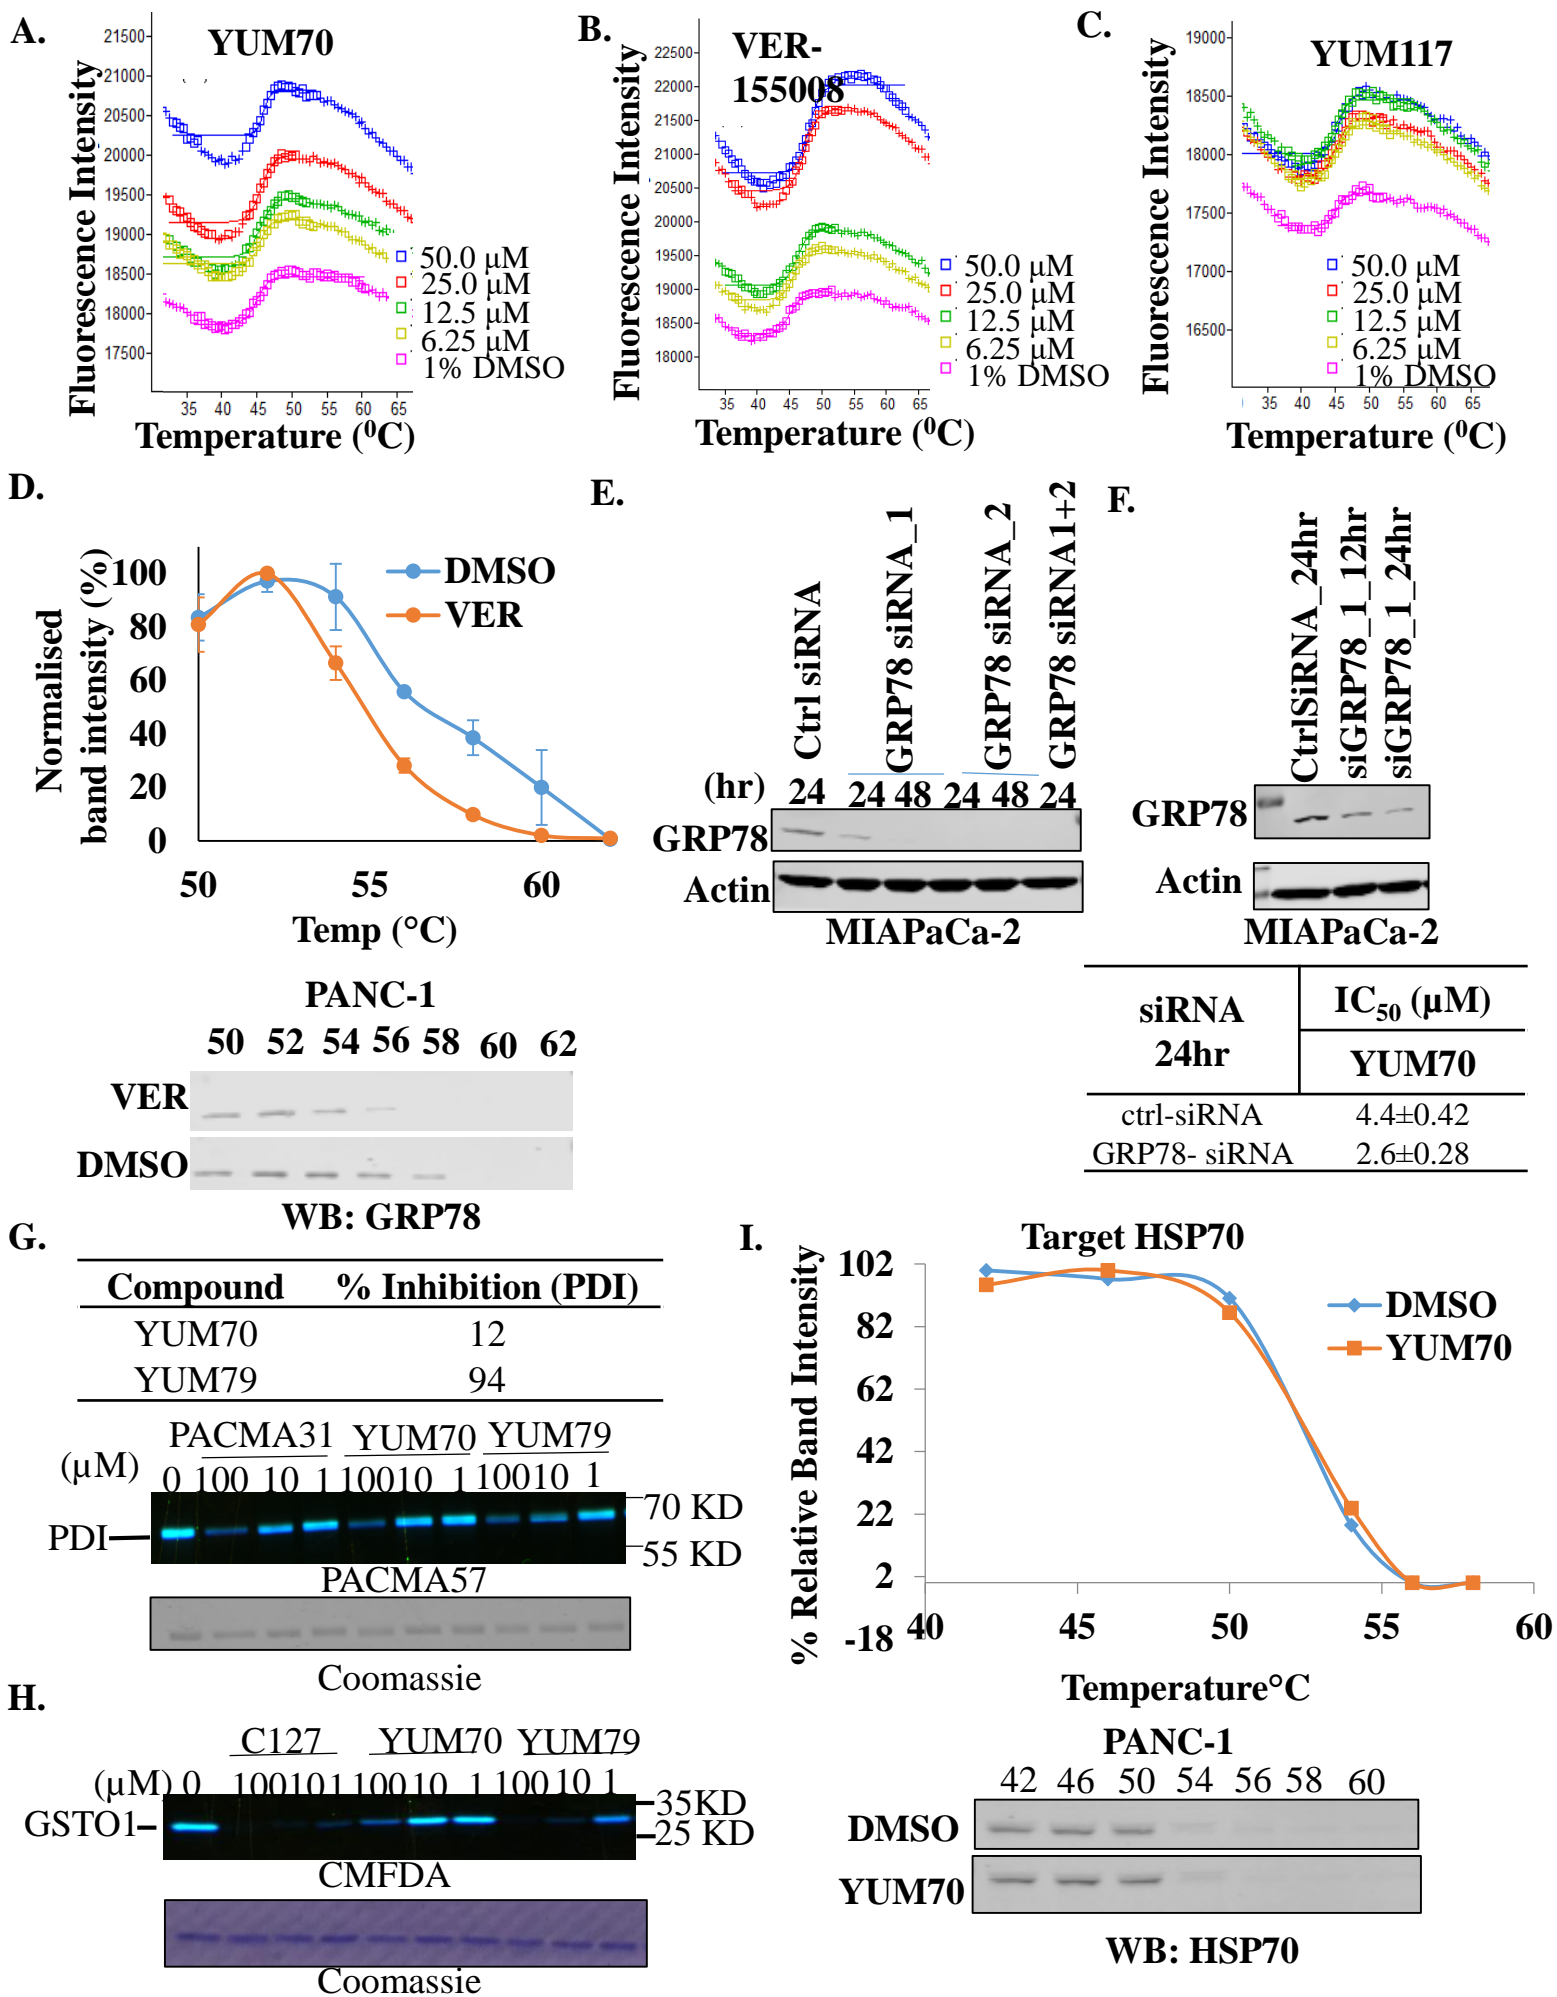

**Figure S9.**

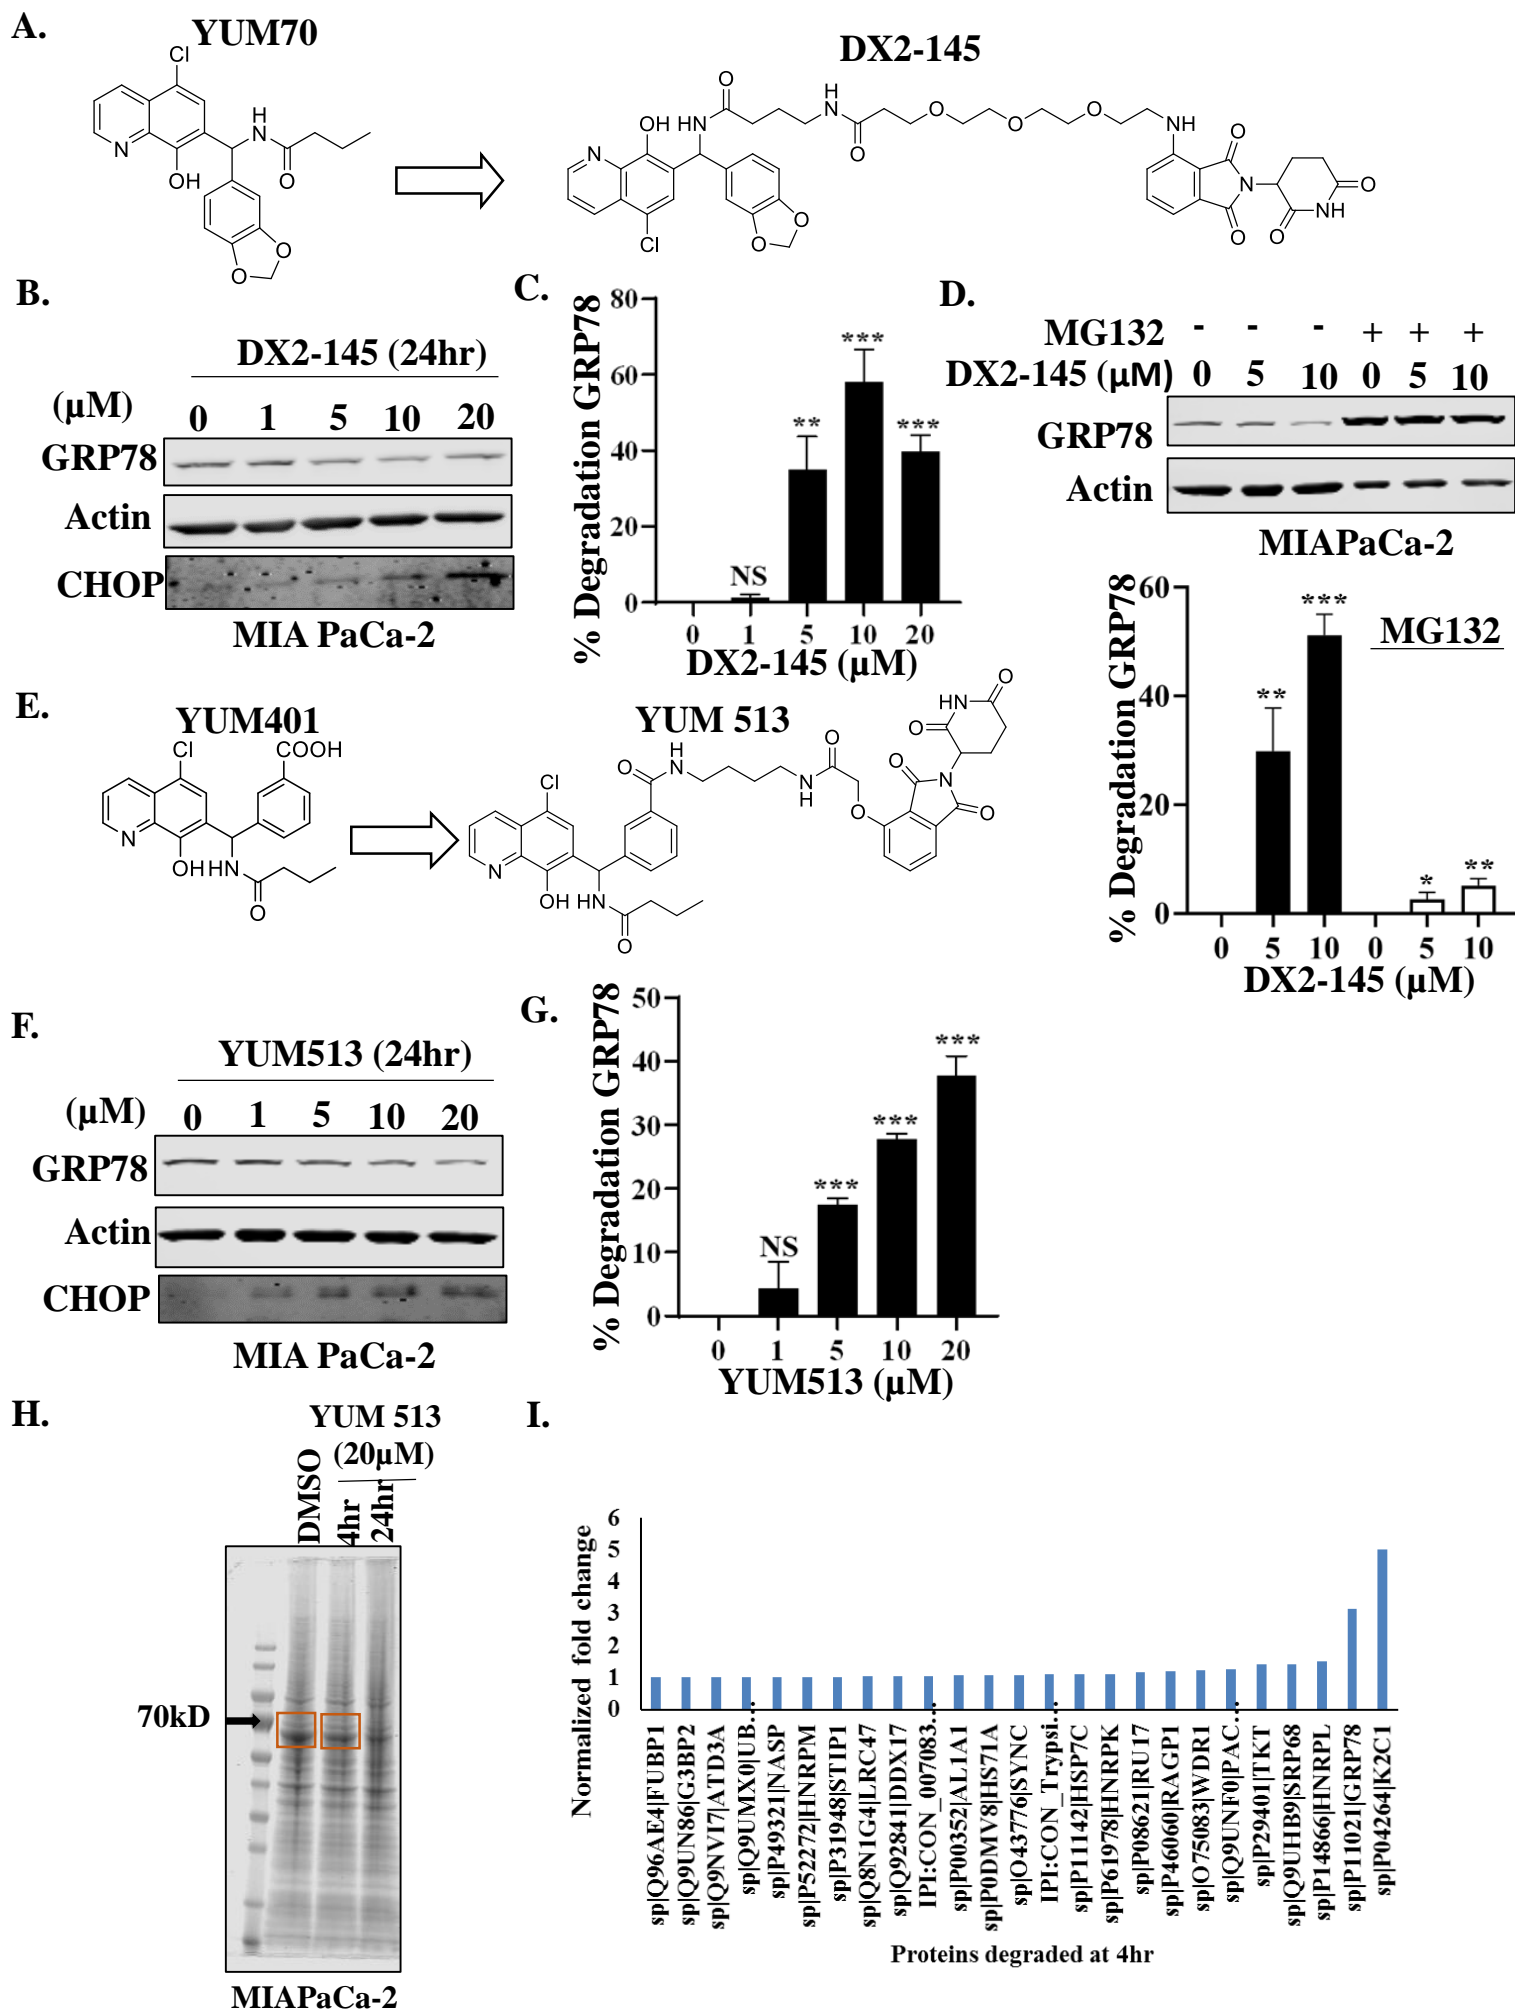



**Figure S10.**

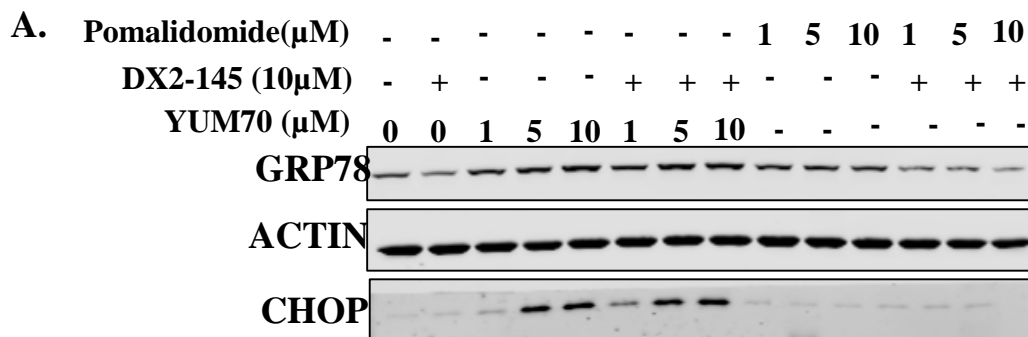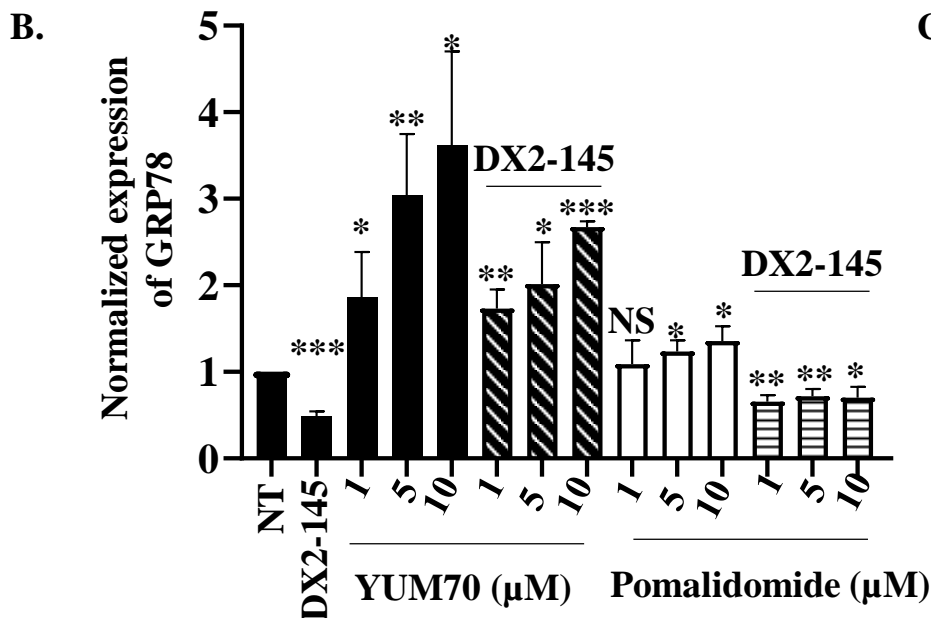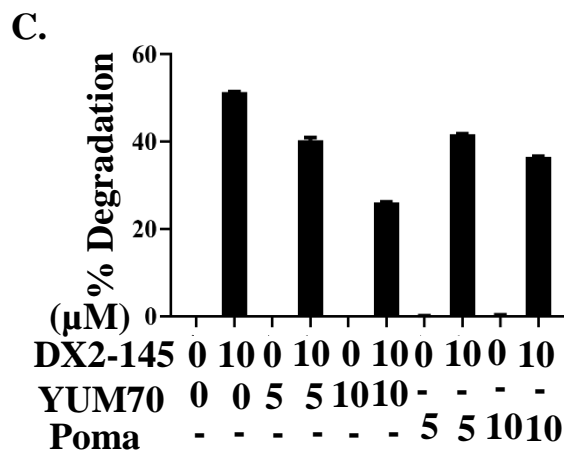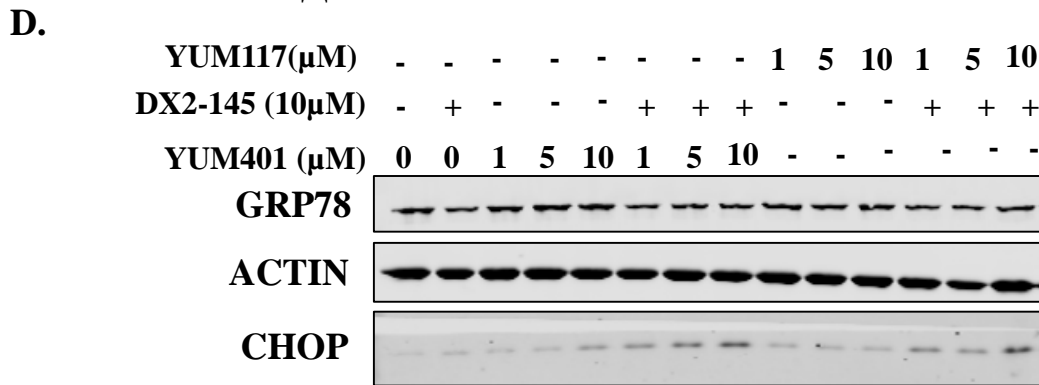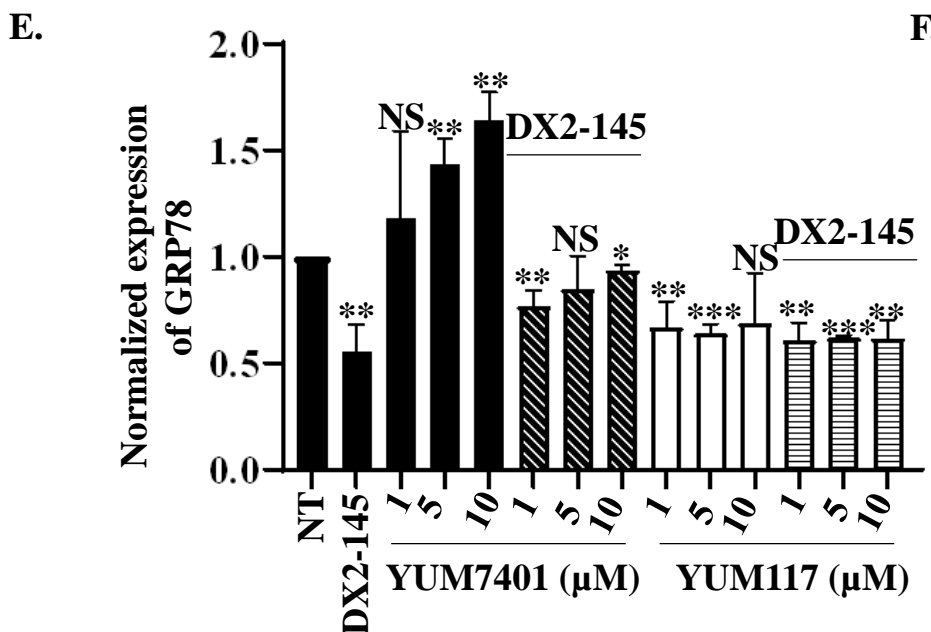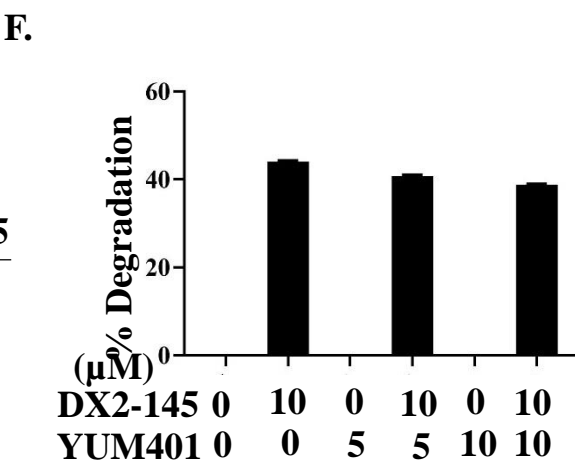

Figure S11.

A.

MIAPaCa-2

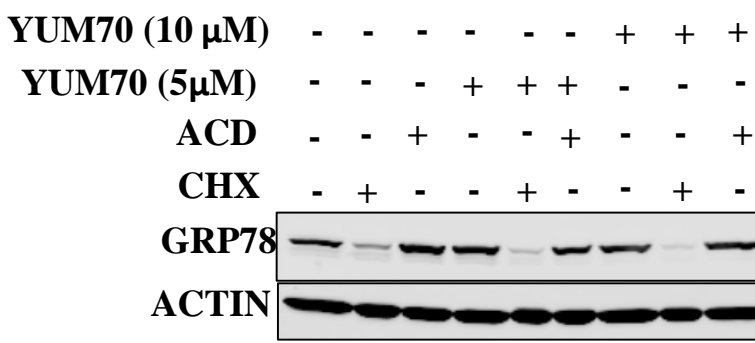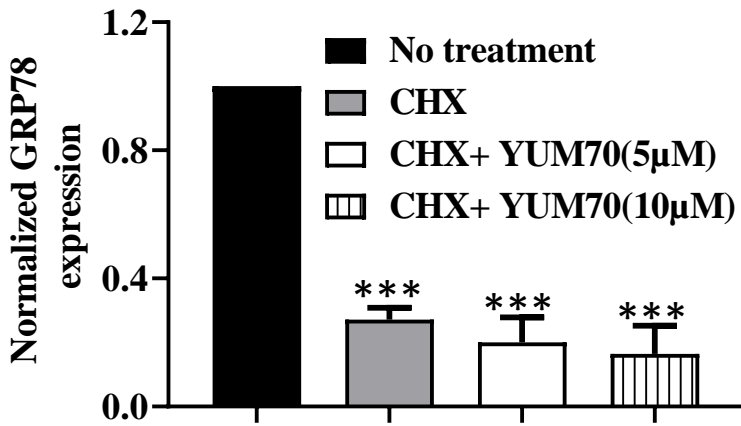

B.

PANC-1

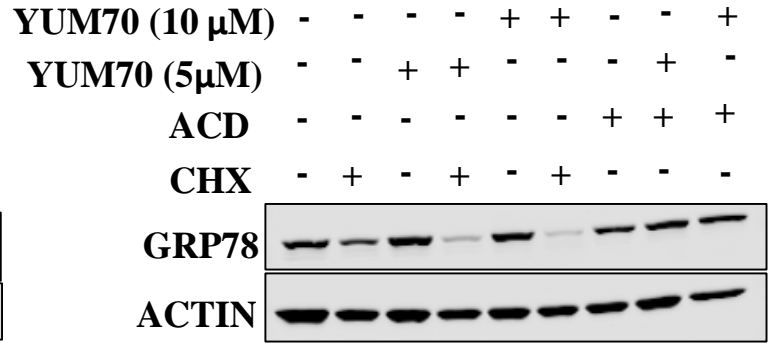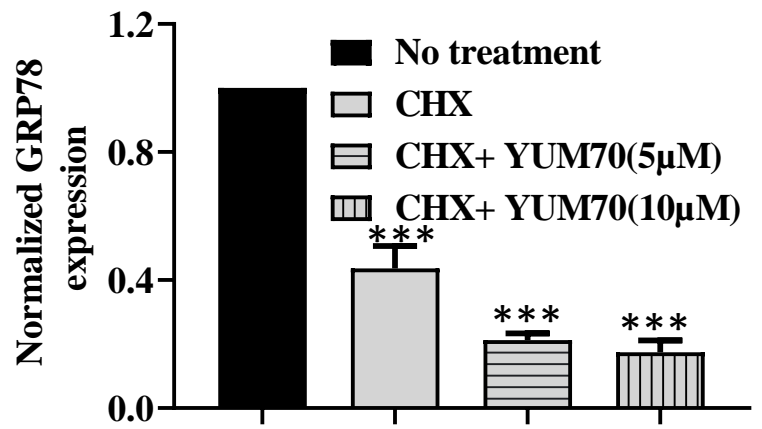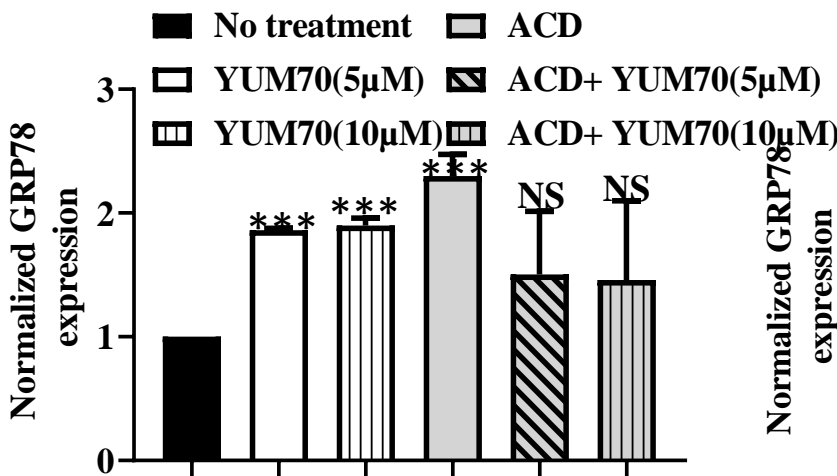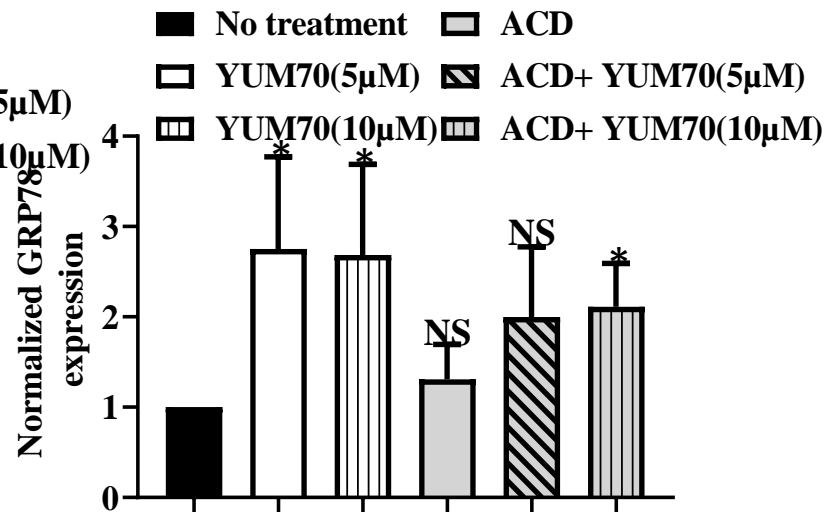

**Figure S12.**

**A.**

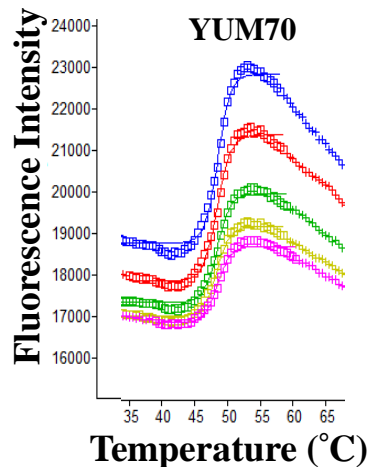

**B.**

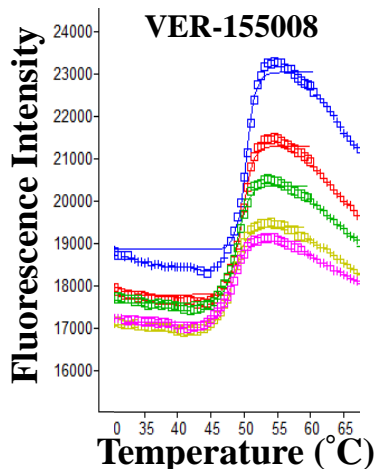

**C.**

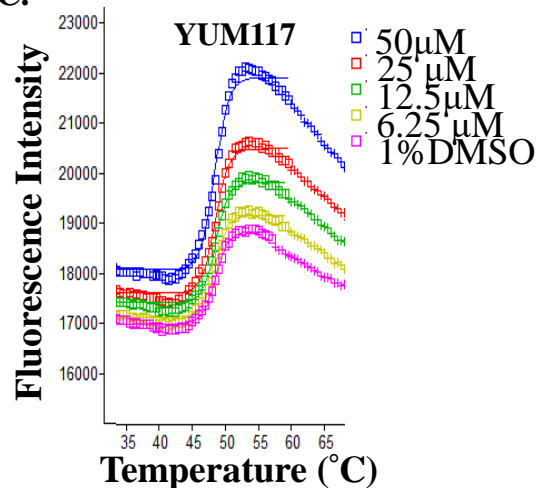

**D.**

| YUM70<br>(μM) | T <sub>m</sub><br>(Av, °C) | T <sub>m</sub><br>shift |
|---------------|----------------------------|-------------------------|
| 50.00         | 48.41±0.11                 | 0.01                    |
| 25.00         | 48.40±0.00                 | 0.00                    |
| 12.50         | 48.30±0.13                 | -0.10                   |
| 6.25          | 48.27±0.10                 | -0.13                   |
| 0.00          | 48.40±0.09                 |                         |

**E.**

| VER<br>(μM) | T <sub>m</sub><br>(Av, °C) | T <sub>m</sub><br>shift |
|-------------|----------------------------|-------------------------|
| 50.00       | 50.36±0.09                 | 2.02                    |
| 25.00       | 49.59±0.01                 | 1.25                    |
| 12.50       | 48.92±0.01                 | 0.58                    |
| 6.25        | 48.58±0.07                 | 0.24                    |
| 0.00        | 48.34±0.06                 |                         |

**F.**

| YUM117<br>(μM) | T <sub>m</sub><br>(Av, °C) | T <sub>m</sub><br>shift |
|----------------|----------------------------|-------------------------|
| 50.00          | 48.44±0.03                 | -0.10                   |
| 25.00          | 48.53±0.05                 | -0.01                   |
| 12.50          | 48.49±0.06                 | -0.05                   |
| 6.25           | 48.52±0.03                 | -0.02                   |
| 0.00           | 48.54±0.01                 |                         |

**G.**

| Cpds  | IC <sub>50</sub> (μM) |
|-------|-----------------------|
| VER   | 1.0±0.67              |
| YUM70 | >50.00                |

**Figure S13**

**A.**

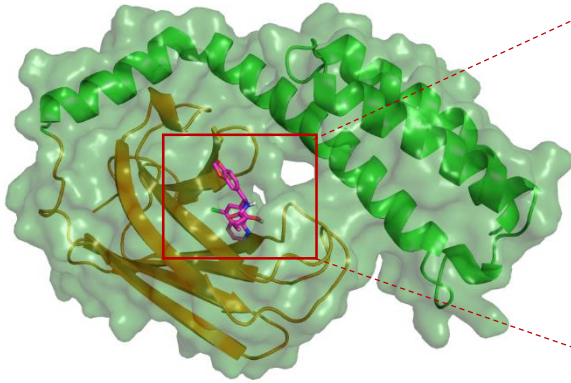

**B.**

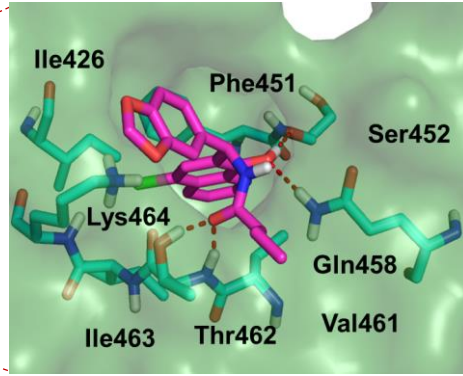

**C.**

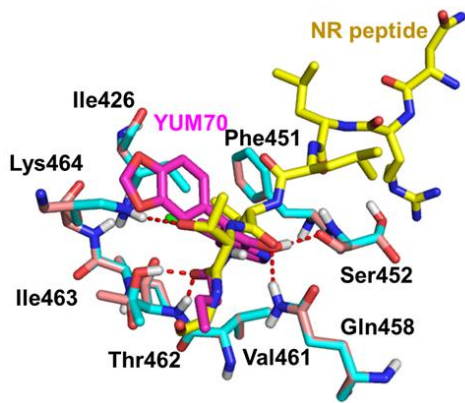

**D.**

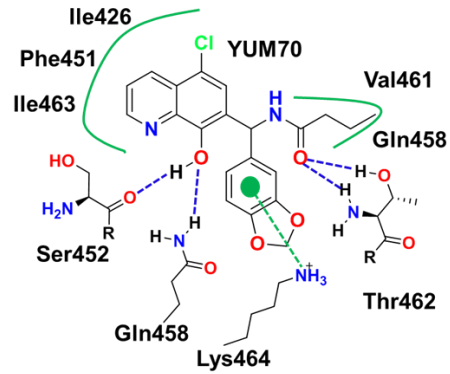

**E.**

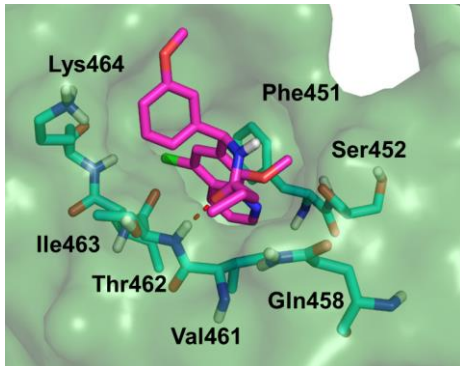

**F.**

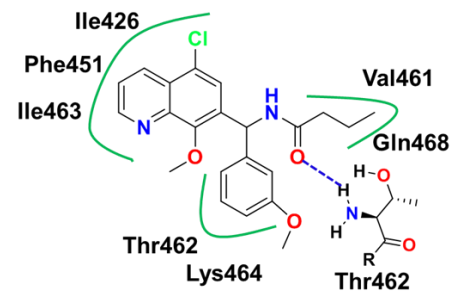

**G.**

|               |   |   |   |   |   |   |   |
|---------------|---|---|---|---|---|---|---|
| ADP (1mM)     | - | - | - | + | - | - | + |
| ATP (1mM)     | - | - | + | - | - | + | - |
| YUM70 (100µM) | - | - | - | - | + | + | + |
| Trypsin       | - | + | + | + | + | + | + |
| GRP78         | + | + | + | + | + | + | + |

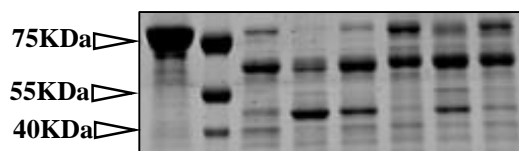

Figure S14

A.

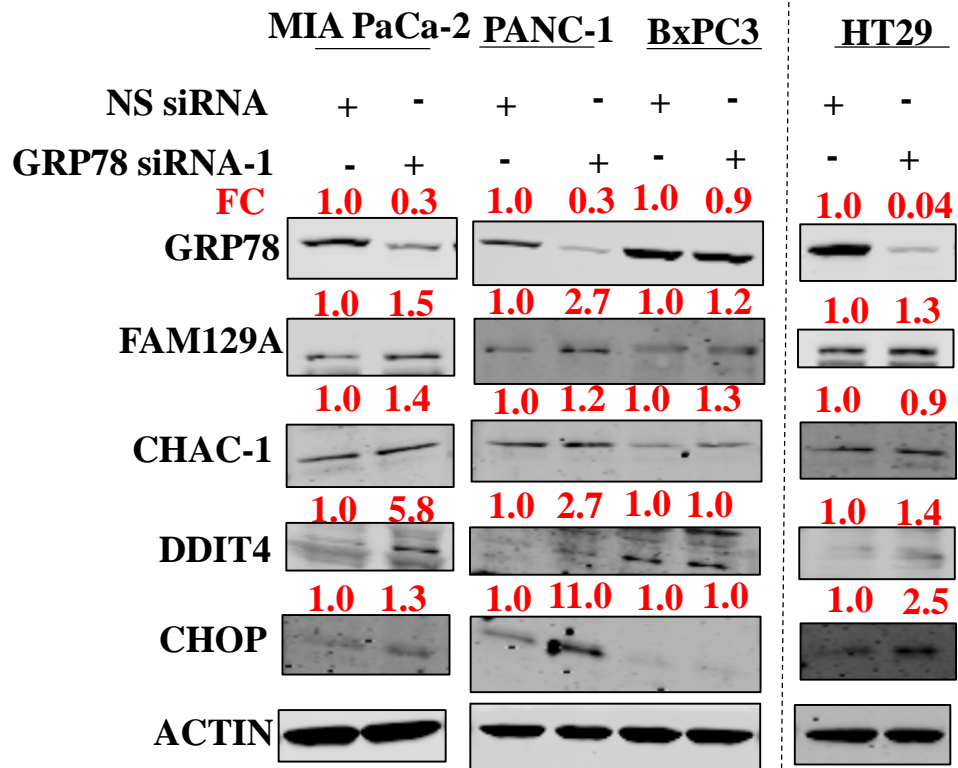

B.

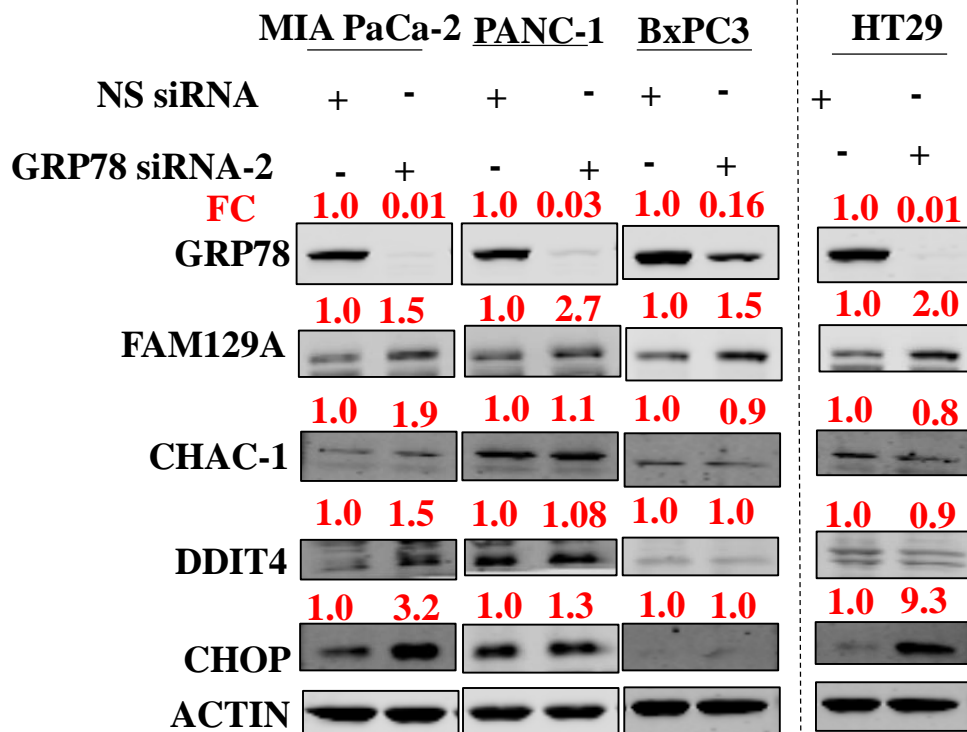

Figure S15

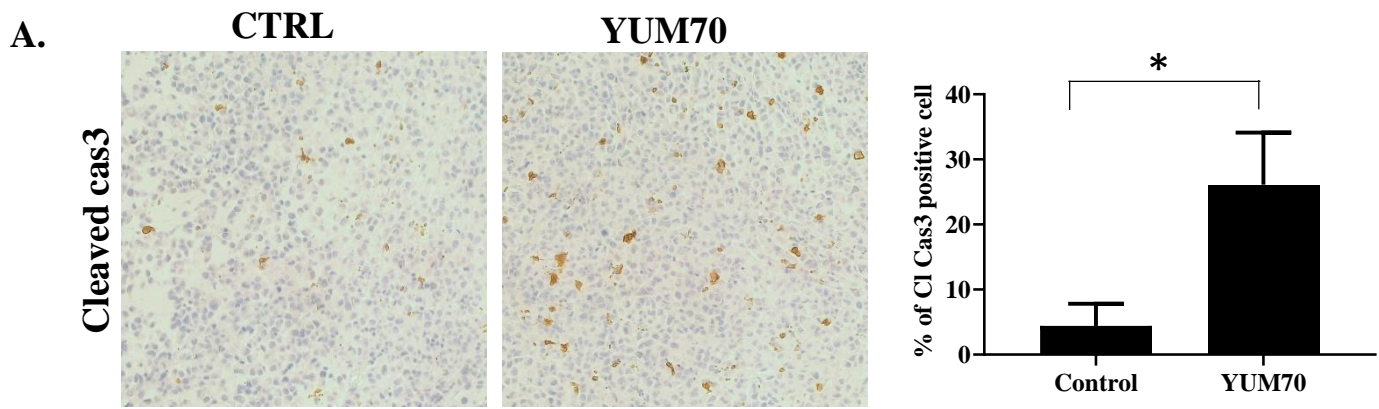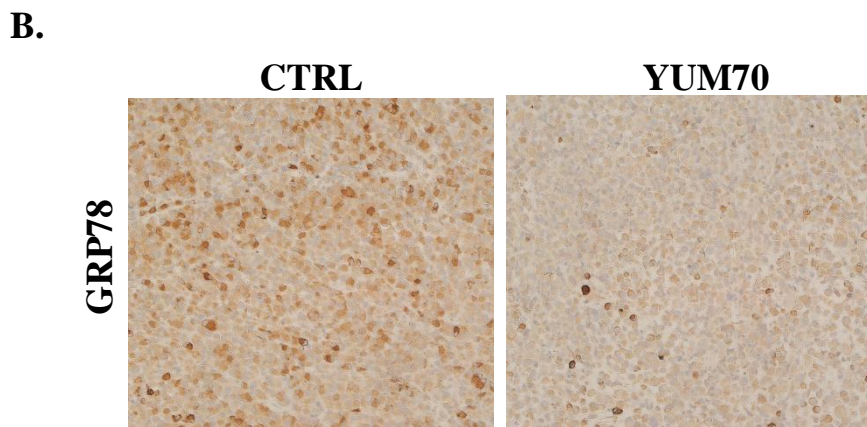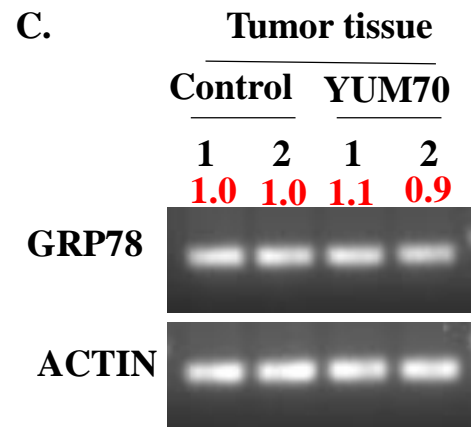

**Figure S16.**

**A.**

|             | IC <sub>50</sub> (μM) |           |            |
|-------------|-----------------------|-----------|------------|
|             | MIA PaCa-2            | PANC-1    | BxPC-3     |
| 5FU         | 11.47±2.03            | >30       | 14.15±3.46 |
| Paclitaxel  | 0.04±0.00             | 0.06±0.05 | 0.01±0.00  |
| Gemcitabine | 0.22±0.00             | >0.3      | 0.01±2.09  |

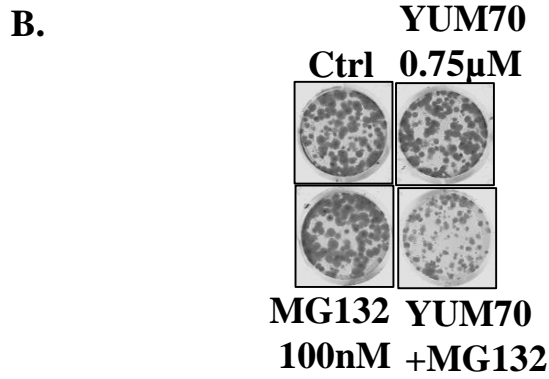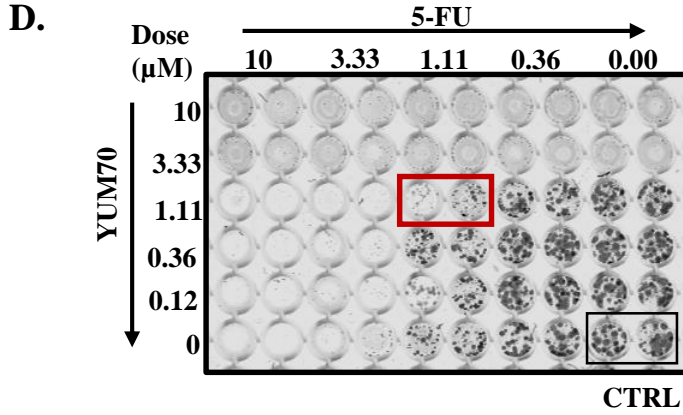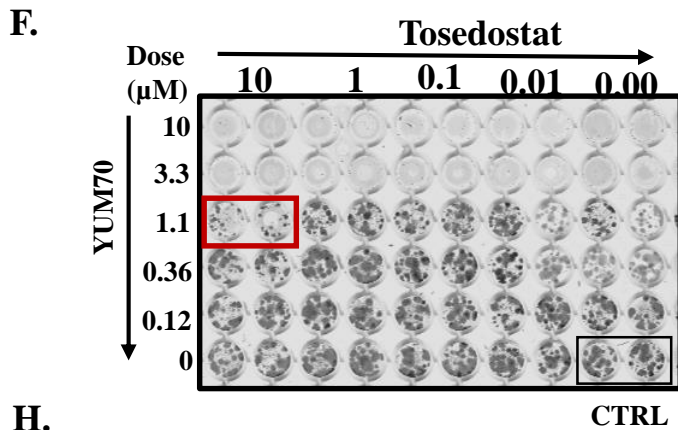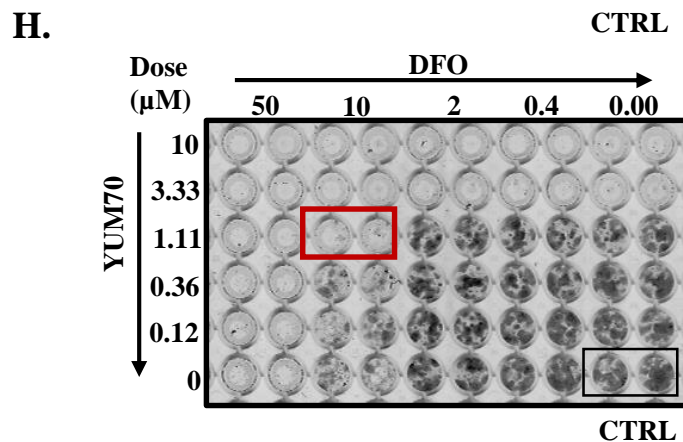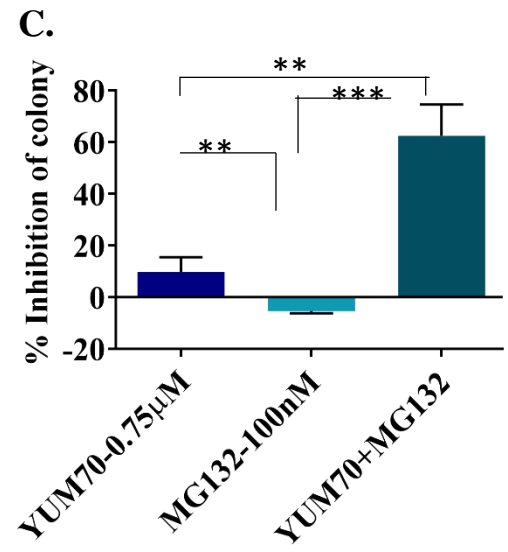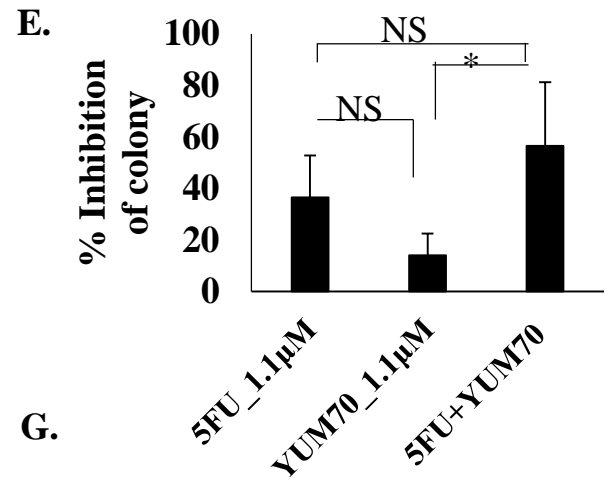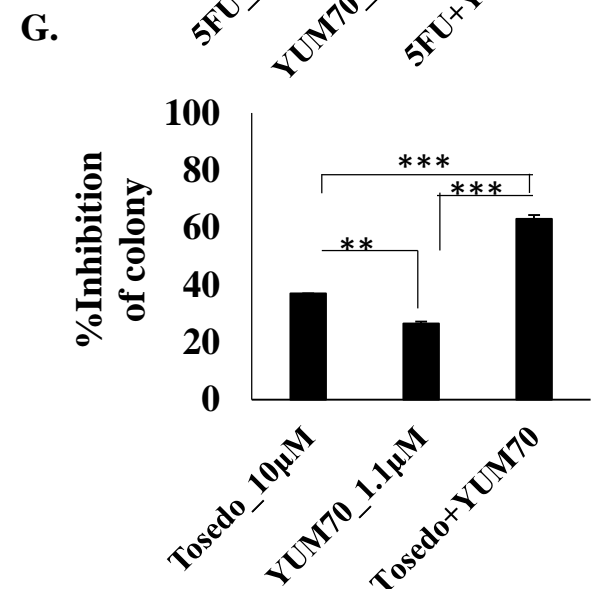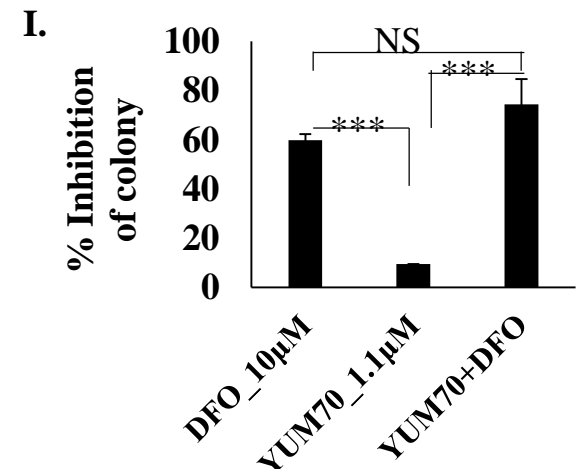

Supplement: NIHMS1671245-supplement-1.pdf [file NIHMS1671245-supplement-1.pdf]
